# Supplementary material
Source: publisher site journal article supplement (https://www.spandidos-publications.com/2473/downloadSupplementary)
Supplement: Supplementary file 1 [file downloadSupplementary]

## Sheet: CancervsNormal
													Table SII. Differentially expressed protein statistics. KEGG, Kyoto Encyclopedia of Genes and Genomes; PEP, maximal posterior error probability for peptides; KO, KEGG orthologs; IPR, ID in InterPro website; CORUM, collection of experimentally verified mammalian protein complexes; KOG, EuKaryotic Orthologous Groups.
Protein accession	Position	Amino acid	Protein description	Gene name	Cancer/normal ratio	Cancer/normal P-value	Regulated type	Quant category	Localization probability	PEP	Score	Modified sequence	Charge	Mass error [ppm]	Subcellular localization	Biological process	Cellular component	Molecular function	KEGG KO no.	KEGG gene	KEGG pathway	IPR ID	Domain description	CORUM complex	KOG category	KOG no.	KOG description
P08263	37	S	Glutathione S-transferase A1	GSTA1	0.123	0.0197	Down	Q1	1	0.000429	92.939	FIKS(1)AEDLDK	3	0.37248	cytoplasm	unsaturated fatty acid metabolic process; peptide metabolic process; cellular developmental process; single-organism process; biosynthetic process; cellular lipid metabolic process; organonitrogen compound biosynthetic process; response to stimulus; cellular metabolic process; sulfur compound biosynthetic process; organic substance metabolic process; cell differentiation; glutathione derivative m…	extracellular exosome; organelle; extracellular region part; cell part; intracellular; cytoplasm; vesicle; extracellular vesicle; intracellular part; cytosol; cell; membrane-bounded organelle; extracellular region; extracellular organelle; cytoplasmic part;	glutathione transferase activity; glutathione peroxidase activity; catalytic activity; binding; transferase activity, transferring alkyl or aryl (other than methyl) groups; antioxidant activity; protein binding; peroxidase activity; transferase activity; oxidoreductase activity, acting on peroxide as acceptor; oxidoreductase activity;	K00799	GST; glutathione S-transferase [EC:2.5.1.18]	hsa01524 Platinum drug resistance - Homo sapiens (human); hsa00480 Glutathione metabolism - Homo sapiens (human); hsa05200 Pathways in cancer - Homo sapiens (human); hsa05204 Chemical carcinogenesis - Homo sapiens (human); hsa00980 Metabolism of xenobiotics by cytochrome P450 - Homo sapiens (human); hsa05418 Fluid shear stress and atherosclerosis - Homo sapiens (human); hsa00982 Drug metabolism -…	IPR010987; IPR004046; IPR004045; IPR012336;	Glutathione S-transferase, C-terminal-like; Glutathione S-transferase, C-terminal; Glutathione S-transferase, N-terminal; Thioredoxin-like fold;		O	KOG1695	Glutathione S-transferase
P08240	473	S	Signal recognition particle receptor subunit alpha	SRPRA	0.143	0.0299	Down	Q1	1	0.00558	52.101	RLS(1)ALHPPEK	4	-0.85748	cytoplasm	regulation of cellular process; single organism signaling; intracellular transport; cellular response to stress; establishment of protein localization to organelle; response to endoplasmic reticulum stress; cellular response to topologically incorrect protein; cellular response to organic substance; single-organism process; IRE1-mediated unfolded protein response; cotranslational protein targetin…	membrane; extracellular region part; nuclear outer membrane-endoplasmic reticulum membrane network; endoplasmic reticulum; rough endoplasmic reticulum membrane; organelle membrane; membrane protein complex; vesicle; cytoplasm; macromolecular complex; intrinsic component of membrane; intracellular part; cell; organelle part; signal recognition particle receptor complex; extracellular exosome; intr…	nucleoside phosphate binding; hydrolase activity, acting on acid anhydrides; hydrolase activity; heterocyclic compound binding; organic cyclic compound binding; pyrophosphatase activity; ribonucleotide binding; catalytic activity; binding; purine ribonucleoside binding; GTPase activity; anion binding; guanyl nucleotide binding; hydrolase activity, acting on acid anhydrides, in phosphorus-containi…	K13431	SRPR; signal recognition particle receptor subunit alpha	hsa03060 Protein export - Homo sapiens (human);	IPR003593; IPR007222; IPR013822; IPR027417; IPR000897; IPR011012;	AAA+ ATPase domain; Signal recognition particle receptor, alpha subunit, N-terminal; Signal recognition particle, SRP54 subunit, helical bundle; P-loop containing nucleoside triphosphate hydrolase; Signal recognition particle, SRP54 subunit, GTPase domain; Longin-like domain;		U	KOG0781	Signal recognition particle receptor, alpha subunit
P08238	452	S	Heat shock protein HSP 90-beta	HSP90AB1	0.147	0.0277	Down	Q1	1	0.000793	113.71	RLS(1)ELLR	3	-0.070288	cytoplasm	single organism signaling; cellular component biogenesis; regulation of cell death; reproductive process; regulation of neuron apoptotic process; positive regulation of biosynthetic process; regulation of defense response; cellular metabolic process; regulation of cell cycle process; regulation of protein serine/threonine kinase activity; metabolic process; macromolecular complex assembly; regula…	membrane; cluster of actin-based cell projections; extracellular region part; organelle membrane; cytoplasm; cytoplasmic vesicle part; macromolecular complex; sperm plasma membrane; cell; ficolin-1-rich granule lumen; organelle part; lysosomal membrane; extracellular exosome; ficolin-1-rich granule; nucleoplasm; plasma membrane region; intracellular; lysosome; secretory vesicle; membrane-bounded …	pyrimidine nucleoside binding; organic cyclic compound binding; histone deacetylase binding; ribonucleotide binding; binding; purine ribonucleoside binding; anion binding; adenyl ribonucleotide binding; adenyl nucleotide binding; pyrimidine nucleotide binding; purine ribonucleoside triphosphate binding; pyrimidine ribonucleotide binding; ATP binding; double-stranded RNA binding; nucleoside bindin…	K04079	HSP90A; molecular chaperone HtpG	hsa05200 Pathways in cancer - Homo sapiens (human); hsa04657 IL-17 signaling pathway - Homo sapiens (human); hsa04659 Th17 cell differentiation - Homo sapiens (human); hsa04621 NOD-like receptor signaling pathway - Homo sapiens (human); hsa04151 PI3K-Akt signaling pathway - Homo sapiens (human); hsa05418 Fluid shear stress and atherosclerosis - Homo sapiens (human); hsa04612 Antigen processing an…	IPR020575; IPR020568; IPR003594;	Heat shock protein Hsp90, N-terminal; Ribosomal protein S5 domain 2-type fold; Histidine kinase-like ATPase, C-terminal domain;	TNF-alpha/NF-kappa B signaling complex 6; TNF-alpha/NF-kappa B signaling complex 9; CDC37-HSP90AA1-HSP90AB1-MAP3K11 complex; Kinase maturation complex 1; Kinase maturation complex 2; IKBKB-CDC37-KIAA1967-HSP90AB1-HSP90AA1 complex; HSP90-CDC37-LRRK2 complex; P2X7 receptor signalling complex; TNF-alpha/NF-kappa B signaling complex 10; RNA-induced silencing complex, RISC; LRRK2-CHIP-HSP90 complex; T…	O	KOG0019	Molecular chaperone (HSP90 family)
P12956	477	S	X-ray repair cross-complementing protein 6	XRCC6	0.168	0.0468	Down	Q1	0.871282	2.56e-09	115.8	S(0.129)DS(0.871)FENPVLQQHFR	3	0.25714	cytoplasm	cellular component biogenesis; positive regulation of type I interferon production; regulation of biological quality; leukocyte activation; DNA ligation; establishment of viral latency; nucleic acid-templated transcription; brain development; positive regulation of biosynthetic process; cellular metabolic process; metabolic process; positive regulation of multicellular organismal process; macromo…	membrane; secretory granule lumen; nonhomologous end joining complex; nuclear chromosome, telomeric region; chromosome, telomeric region; cytoplasmic vesicle; telomere cap complex; vesicle; cytoplasm; cytoplasmic vesicle part; macromolecular complex; intracellular part; cell; ficolin-1-rich granule lumen; organelle part; chromosomal part; non-membrane-bounded organelle; Ku70:Ku80 complex; ficolin…	nucleoside phosphate binding; double-stranded DNA binding; ATP-dependent helicase activity; hydrolase activity, acting on acid anhydrides; telomeric DNA binding; protein binding; hydrolase activity; carbon-oxygen lyase activity; ATPase activity; regulatory region DNA binding; heterocyclic compound binding; organic cyclic compound binding; pyrophosphatase activity; ribonucleotide binding; catalyti…	K10884	XRCC6; ATP-dependent DNA helicase 2 subunit 1	hsa03450 Non-homologous end-joining - Homo sapiens (human);	IPR005161; IPR003034; IPR006164; IPR016194; IPR005160; IPR002035; IPR027388;	Ku70/Ku80, N-terminal alpha/beta; SAP domain; Ku70/Ku80 beta-barrel domain; SPOC-like, C-terminal domain; Ku70/Ku80 C-terminal arm; von Willebrand factor, type A; Ku70, bridge and pillars domain;	DNA-PK-Ku complex; PCNA-KU antigen complex; WRN-Ku70-Ku80-PARP1 complex; 53BP1-containing complex; Ku antigen-NARG1 complex; Ku antigen complex; Ku70/Ku86 complex; DHX9-ADAR-vigilin-DNA-PK-Ku antigen complex; Vigilin-DNA-PK-Ku antigen complex; TERF2-RAP1 complex; DNA-PK-Ku-eIF2-NF90-NF45 complex; GammaH2AFX-NDHII-Ku70-DNA complex; DNA double-strand break end-joining complex; NCOA6-DNA-PK-Ku-PARP1…	L	KOG2327	DNA-binding subunit of a DNA-dependent protein kinase (Ku70 autoantigen)
P08263	132	Y	Glutathione S-transferase A1	GSTA1	0.199	0.00952	Down	Q1	1	0.00551	124.83	Y(1)FPAFEK	2	1.1553	cytoplasm	unsaturated fatty acid metabolic process; peptide metabolic process; cellular developmental process; single-organism process; biosynthetic process; cellular lipid metabolic process; organonitrogen compound biosynthetic process; response to stimulus; cellular metabolic process; sulfur compound biosynthetic process; organic substance metabolic process; cell differentiation; glutathione derivative m…	extracellular exosome; organelle; extracellular region part; cell part; intracellular; cytoplasm; vesicle; extracellular vesicle; intracellular part; cytosol; cell; membrane-bounded organelle; extracellular region; extracellular organelle; cytoplasmic part;	glutathione transferase activity; glutathione peroxidase activity; catalytic activity; binding; transferase activity, transferring alkyl or aryl (other than methyl) groups; antioxidant activity; protein binding; peroxidase activity; transferase activity; oxidoreductase activity, acting on peroxide as acceptor; oxidoreductase activity;	K00799	GST; glutathione S-transferase [EC:2.5.1.18]	hsa01524 Platinum drug resistance - Homo sapiens (human); hsa00480 Glutathione metabolism - Homo sapiens (human); hsa05200 Pathways in cancer - Homo sapiens (human); hsa05204 Chemical carcinogenesis - Homo sapiens (human); hsa00980 Metabolism of xenobiotics by cytochrome P450 - Homo sapiens (human); hsa05418 Fluid shear stress and atherosclerosis - Homo sapiens (human); hsa00982 Drug metabolism -…	IPR010987; IPR004046; IPR004045; IPR012336;	Glutathione S-transferase, C-terminal-like; Glutathione S-transferase, C-terminal; Glutathione S-transferase, N-terminal; Thioredoxin-like fold;		O	KOG1695	Glutathione S-transferase
Q9UDY2	16	S	Tight junction protein ZO-2	TJP2	0.199	0.0418	Down	Q1	1	0.0153	69.275	ELS(1)GWLR	2	-0.39459	nucleus	single organism signaling; GDP metabolic process; negative regulation of developmental process; regulation of biological quality; nucleoside metabolic process; purine nucleoside metabolic process; digestion; purine ribonucleoside monophosphate metabolic process; cell surface receptor signaling pathway; negative regulation of myeloid leukocyte differentiation; intestinal absorption; cellular devel…	intracellular organelle; membrane; cell periphery; cell junction; intracellular organelle part; cytoplasm; anchoring junction; nuclear lumen; intracellular part; cell-cell junction; cytosol; cell; bicellular tight junction; organelle part; apical junction complex; plasma membrane; membrane-enclosed lumen; organelle; intracellular membrane-bounded organelle; nucleoplasm; nucleus; occluding junctio…	protein binding, bridging; nucleobase-containing compound kinase activity; protein binding; phosphotransferase activity, phosphate group as acceptor; nucleotide kinase activity; cell adhesion molecule binding; kinase activity; catalytic activity; binding; guanylate kinase activity; cadherin binding; protein domain specific binding; binding, bridging; protein C-terminus binding; transferase activi…	K06098	TJP2; tight junction protein 2	hsa05110 Vibrio cholerae infection - Homo sapiens (human); hsa04530 Tight junction - Homo sapiens (human);	IPR011511; IPR001452; IPR008144; IPR008145; IPR027417; IPR001478;	Variant SH3 domain; SH3 domain; Guanylate kinase-like domain; Guanylate kinase/L-type calcium channel beta subunit; P-loop containing nucleoside triphosphate hydrolase; PDZ domain;		T	KOG3580	Tight junction proteins
P43487	60	S	Ran-specific GTPase-activating protein	RANBP1	0.202	0.00251	Down	Q1	1	8.21e-13	161.49	FAS(1)ENDLPEWK	3	-0.49082	cytoplasm	single organism signaling; RNA transport; establishment of protein localization to organelle; protein import; positive regulation of nuclear division; single-organism process; nuclear transport; nuclear export; multi-organism cellular process; cellular metabolic process; regulation of cell cycle process; protein transport; establishment of localization; protein targeting; positive regulation of c…	intracellular organelle; intracellular non-membrane-bounded organelle; nuclear envelope; cytoskeletal part; cytoplasm; organelle envelope; intracellular organelle part; endomembrane system; intracellular part; cytosol; cell; organelle part; non-membrane-bounded organelle; cytoskeleton; intracellular membrane-bounded organelle; organelle; microtubule organizing center; nucleus; microtubule cytoske…	small GTPase binding; GDP-dissociation inhibitor activity; nucleoside-triphosphatase regulator activity; GTPase regulator activity; protein binding; molecular function regulator; cell adhesion molecule binding; enzyme regulator activity; Ras GTPase binding; binding; cadherin binding; Ran GTPase binding; GTPase binding; enzyme binding; enzyme activator activity; GTPase activator activity;	K15306	RANBP1; Ran-binding protein 1	hsa05166 HTLV-I infection - Homo sapiens (human); hsa05203 Viral carcinogenesis - Homo sapiens (human);	IPR000156; IPR011993;	Ran binding domain; PH domain-like;	RANBP1-RAN-KPNB1 complex; RANBMP-CD39 complex;	U	KOG0864	Ran-binding protein RANBP1 and related RanBD domain proteins
P31947	63	S	14-3-3 protein sigma	SFN	0.209	0.000805	Down	Q1	0.846048	0.00412	78.342	VLS(0.846)S(0.154)IEQK	2	0.043484	cytoplasm,nucleus	single organism signaling; negative regulation of cell cycle G1/S phase transition; regulation of biological quality; regulation of cell death; regulation of keratinocyte proliferation; keratinization; positive regulation of epithelial cell differentiation; regulation of cell cycle process; regulation of mitochondrion organization; positive regulation of growth; negative regulation of cell prolif…	membrane; intracellular vesicle; intracellular organelle; extracellular space; extracellular region part; organelle membrane; cytoplasmic vesicle; intracellular organelle part; vesicle; cytoplasm; cytoplasmic vesicle part; vesicle membrane; intracellular part; cytosol; cell; extracellular region; organelle part; mitochondrion; cytoplasmic vesicle membrane; intracellular membrane-bounded organelle…	protein serine/threonine kinase inhibitor activity; protein kinase binding; protein kinase inhibitor activity; protein kinase C inhibitor activity; protein binding; kinase regulator activity; protein kinase regulator activity; enzyme inhibitor activity; molecular function regulator; kinase binding; phosphoprotein binding; cell adhesion molecule binding; identical protein binding; enzyme regulator…	K06644	SFN; stratifin	hsa04960 Aldosterone-regulated sodium reabsorption - Homo sapiens (human); hsa04110 Cell cycle - Homo sapiens (human); hsa04115 p53 signaling pathway - Homo sapiens (human);	IPR023410;	14-3-3 domain;	BRAF-RAF1-14-3-3 complex;	O	KOG0841	Multifunctional chaperone (14-3-3 family)
P05093	258	S	Steroid 17-alpha-hydroxylase/17,20 lyase	CYP17A1	0.217	0.00903	Down	Q1	0.821422	5.81e-10	119.76	S(0.166)DS(0.821)IT(0.012)NMLDTLMQAK	3	0.14001	endoplasmic reticulum	reproduction; hormone biosynthetic process; regulation of biological quality; organic hydroxy compound metabolic process; reproductive process; single-organism process; biosynthetic process; C21-steroid hormone metabolic process; sterol metabolic process; cellular metabolic process; organic substance metabolic process; lipid biosynthetic process; progesterone metabolic process; androgen metabolic…	intracellular organelle; membrane; nuclear outer membrane-endoplasmic reticulum membrane network; cell projection; endoplasmic reticulum; intracellular organelle part; cytoplasm; neuronal cell body; endomembrane system; intracellular part; cell; organelle part; mitochondrion; axon; intracellular membrane-bounded organelle; organelle; somatodendritic compartment; endoplasmic reticulum part; membra…	iron ion binding; steroid 17-alpha-monooxygenase activity; oxygen binding; ion binding; lyase activity; oxidoreductase activity, acting on paired donors, with incorporation or reduction of molecular oxygen; oxidoreductase activity; organic cyclic compound binding; steroid hydroxylase activity; heterocyclic compound binding; heme binding; transition metal ion binding; catalytic activity; carbon-ca…	K00512	CYP17A; steroid 17alpha-monooxygenase / 17alpha-hydroxyprogesterone deacetylase [EC:1.14.14.19 1.14.14.32]	hsa00140 Steroid hormone biosynthesis - Homo sapiens (human); hsa04917 Prolactin signaling pathway - Homo sapiens (human); hsa04913 Ovarian steroidogenesis - Homo sapiens (human); hsa01100 Metabolic pathways - Homo sapiens (human);				Q	KOG0156	Cytochrome P450 CYP2 subfamily
P49327	831	S	Fatty acid synthase	FASN	0.225	0.0162	Down	Q1	0.999282	0.00249	62.088	GT(0.001)PLIS(0.999)PLIK	3	0.7521	cytoplasm	cofactor biosynthetic process; osteoblast differentiation; gland development; organic acid biosynthetic process; fatty-acyl-CoA metabolic process; cellular developmental process; single-organism process; cellular lipid metabolic process; biosynthetic process; cellular response to cytokine stimulus; cellular metabolic process; thioester biosynthetic process; sulfur compound biosynthetic process; l…	intracellular vesicle; intracellular organelle; membrane; extracellular region part; cytoplasmic vesicle; cell periphery; melanosome; vesicle; cytoplasm; endomembrane system; intracellular part; cytosol; cell; extracellular region; mitochondrion; plasma membrane; pigment granule; intracellular membrane-bounded organelle; organelle; extracellular exosome; glycogen granule; intracellular; cell part…	S-acyltransferase activity; nucleoside phosphate binding; enoyl-[acyl-carrier-protein] reductase (NADPH, B-specific) activity; oxidoreductase activity, acting on the CH-CH group of donors, NAD or NADP as acceptor; protein dimerization activity; NADPH binding; protein binding; hydrolase activity; enoyl-[acyl-carrier-protein] reductase (NADPH, A-specific) activity; carbon-oxygen lyase activity; 3-o…	K00665	FASN; fatty acid synthase, animal type [EC:2.3.1.85]	hsa00061 Fatty acid biosynthesis - Homo sapiens (human); hsa01100 Metabolic pathways - Homo sapiens (human); hsa01212 Fatty acid metabolism - Homo sapiens (human); hsa04910 Insulin signaling pathway - Homo sapiens (human); hsa04152 AMPK signaling pathway - Homo sapiens (human);	IPR016035; IPR020807; IPR013149; IPR020841; IPR011032; IPR020843; IPR013217; IPR013968; IPR016036; IPR032821; IPR029058; IPR014031; IPR029063; IPR014043; IPR014030; IPR020801; IPR016039; IPR020806; IPR023102; IPR001031; IPR009081; IPR016040; IPR001227;	Acyl transferase/acyl hydrolase/lysophospholipase; Polyketide synthase, dehydratase domain; Alcohol dehydrogenase, C-terminal; Polyketide synthase, beta-ketoacyl synthase domain; GroES-like; Polyketide synthase, enoylreductase domain; Methyltransferase type 12; Polyketide synthase, ketoreductase domain; Malonyl-CoA ACP transacylase, ACP-binding; Ketoacyl-synthetase, C-terminal extension; Alpha/Be…		I	KOG1202	Animal-type fatty acid synthase and related proteins
Q9BVC5	193	S	Ashwin	C2orf49	0.229	0.00628	Down	Q1	0.861726	0.000913	56.872	S(0.137)PPLS(0.862)PVGT(0.001)TPVK	3	-0.12921	nucleus	single-multicellular organism process; cellular aromatic compound metabolic process; single-organism process; cellular metabolic process; organic substance metabolic process; anatomical structure morphogenesis; metabolic process; heterocycle metabolic process; nucleobase-containing compound metabolic process; cellular nitrogen compound metabolic process; multicellular organism development; macrom…	intracellular organelle; intracellular organelle part; nuclear lumen; macromolecular complex; intracellular part; cell; organelle part; organelle; intracellular membrane-bounded organelle; membrane-enclosed lumen; nucleus; tRNA-splicing ligase complex; nucleoplasm; intracellular organelle lumen; intracellular; cell part; membrane-bounded organelle; protein complex; organelle lumen; nuclear part;		K15432
Q96RP9	275	S	Elongation factor G, mitochondrial	GFM1	0.234	0.0276	Down	Q1	0.887263	0.0227	59.067	IPS(0.887)IS(0.113)DLK	2	-0.40649	mitochondria	peptide metabolic process; translational elongation; peptide biosynthetic process; cellular protein metabolic process; nitrogen compound metabolic process; biosynthetic process; mitochondrial translation; cellular amide metabolic process; primary metabolic process; organonitrogen compound biosynthetic process; organic substance biosynthetic process; cellular metabolic process; cellular biosynthet…	mitochondrial matrix; intracellular organelle; mitochondrial part; cytoplasm; intracellular organelle part; intracellular part; cell; mitochondrion; organelle part; membrane-enclosed lumen; organelle; intracellular membrane-bounded organelle; intracellular organelle lumen; cell part; intracellular; membrane-bounded organelle; cytoplasmic part; organelle lumen;	nucleoside phosphate binding; translation elongation factor activity; hydrolase activity, acting on acid anhydrides; protein binding; hydrolase activity; heterocyclic compound binding; organic cyclic compound binding; pyrophosphatase activity; ribonucleotide binding; catalytic activity; binding; purine ribonucleoside binding; GTPase activity; anion binding; guanyl nucleotide binding; hydrolase ac…	K02355			IPR027417; IPR000795; IPR005517; IPR005225; IPR000640; IPR004161; IPR020568; IPR014721; IPR009022; IPR009000;	P-loop containing nucleoside triphosphate hydrolase; Transcription factor, GTP-binding domain; Translation elongation factor EFG/EF2, domain IV; Small GTP-binding protein domain; Translation elongation factor EFG, V domain; Translation elongation factor EFTu-like, domain 2; Ribosomal protein S5 domain 2-type fold; Ribosomal protein S5 domain 2-type fold, subgroup; Elongation factor G, III-V domai…		J	KOG0465	Mitochondrial elongation factor
P49207	12	S	60S ribosomal protein L34	RPL34	0.24	0.0399	Down	Q1	0.898694	0.000203	107.2	RLS(0.899)YNT(0.101)ASNK	3	-0.6279	nucleus	cellular component biogenesis; ribonucleoprotein complex biogenesis; establishment of protein localization to organelle; peptide metabolic process; biosynthetic process; multi-organism cellular process; cellular metabolic process; protein transport; establishment of localization; protein targeting; protein targeting to membrane; metabolic process; multi-organism metabolic process; establishment o…	extracellular region part; vesicle; cytoplasm; macromolecular complex; intracellular part; cell; organelle part; non-membrane-bounded organelle; extracellular exosome; ribosomal subunit; intracellular; cell part; extracellular vesicle; cytosolic part; membrane-bounded organelle; cytosolic ribosome; intracellular organelle; ribosome; intracellular non-membrane-bounded organelle; cytosolic large ri…	organic cyclic compound binding; heterocyclic compound binding; cell adhesion molecule binding; RNA binding; binding; cadherin binding; nucleic acid binding; protein binding; structural molecule activity; structural constituent of ribosome;	K02915	RP-L34e; large subunit ribosomal protein L34e	hsa03010 Ribosome - Homo sapiens (human);			Ribosome, cytoplasmic; TRBP containing complex (DICER, RPL7A, EIF6, MOV10 and subunits of the 60S ribosomal particle); 60S ribosomal subunit, cytoplasmic;	J	KOG1790	60s ribosomal protein L34
Q8N3V7	263	S	Synaptopodin	SYNPO	0.25	0.00232	Down	Q1	1	2.05e-05	90.561	VAS(1)EEEEVPLVVYLK	3	-0.29864	nucleus	cellular component biogenesis; regulation of cellular process; cellular component organization; single-multicellular organism process; regulation of biological quality; regulation of actin cytoskeleton organization; response to abiotic stimulus; regulation of signaling; single-organism process; regulation of cellular component biogenesis; response to stimulus; neurological system process; positiv…	dendrite; membrane; cell periphery; cell junction; myofibril; cytoplasm; neuronal cell body; supramolecular fiber; intracellular part; Z disc; cell-cell junction; supramolecular complex; cell; I band; asymmetric synapse; organelle part; dendritic spine; non-membrane-bounded organelle; cytoskeleton; occluding junction; plasma membrane region; neuron spine; membrane part; intracellular; cell part; …	actin binding; protein binding; cytoskeletal protein binding; binding;	K21112	SYNPO; synaptopodin	hsa04530 Tight junction - Homo sapiens (human);
Q17RC7	52	S	Exocyst complex component 3-like protein 4	EXOC3L4	0.251	0.0269	Down	Q1	1	0.000549	100.02	LGLGS(1)LR	2	0.95136	nucleus	exocyst localization; vesicle-mediated transport; single-organism cellular process; single-organism process; establishment of localization; cellular localization; transport; cellular macromolecule localization; cellular protein complex localization; single-organism localization; secretion by cell; cellular protein localization; protein localization; macromolecule localization; localization; cellu…	cell cortex; cell part; cell cortex part; intracellular; cell periphery; cytoplasm; cytoplasmic region; macromolecular complex; intracellular part; exocyst; protein complex; cell; cytoplasmic part; tethering complex;	SNARE binding; protein binding; binding;							U	KOG2286	Exocyst complex subunit SEC6
Q9NUU7	85	S	ATP-dependent RNA helicase DDX19A	DDX19A	0.254	0.0339	Down	Q1	0.999359	0.000157	122.78	DPNS(0.999)PLYSVK	3	-0.11884	cytoplasm	RNA transport; cellular aromatic compound metabolic process; regulation of macromolecule metabolic process; mRNA transport; cellular metabolic process; protein transport; establishment of RNA localization; organic substance metabolic process; establishment of localization; metabolic process; heterocycle metabolic process; nucleobase-containing compound metabolic process; nucleic acid transport; n…	intracellular organelle; membrane; nuclear pore; organelle membrane; nuclear envelope; cytoplasm; intracellular organelle part; organelle envelope; macromolecular complex; endomembrane system; intracellular part; spliceosomal complex; cell; organelle part; organelle; intracellular membrane-bounded organelle; catalytic complex; nuclear membrane; nucleus; cell part; intracellular; envelope; catalyt…	nucleoside phosphate binding; ATP-dependent helicase activity; hydrolase activity, acting on acid anhydrides; protein binding; hydrolase activity; ATPase activity; heterocyclic compound binding; organic cyclic compound binding; pyrophosphatase activity; catalytic activity; ribonucleotide binding; binding; purine ribonucleoside binding; ATP-dependent RNA helicase activity; anion binding; adenyl ri…	K18655			IPR014014; IPR011545; IPR014001; IPR027417; IPR001650;	RNA helicase, DEAD-box type, Q motif; DEAD/DEAH box helicase domain; Helicase superfamily 1/2, ATP-binding domain; P-loop containing nucleoside triphosphate hydrolase; Helicase, C-terminal;		A	KOG0332	ATP-dependent RNA helicase
Q9NZN5	608	S	Rho guanine nucleotide exchange factor 12	ARHGEF12	0.262	0.0274	Down	Q1	0.983251	9.77e-06	103.14	RPS(0.983)RHDNS(0.017)AIGR	4	0.024885	nucleus	regulation of cellular process; single organism signaling; regulation of cell death; regulation of signaling; regulation of programmed cell death; positive regulation of apoptotic process; single-organism process; regulation of Ras protein signal transduction; response to stimulus; signal transduction; regulation of cell communication; cell communication; positive regulation of hydrolase activity…	membrane; extracellular region part; cytoplasm; vesicle; intracellular part; cytosol; cell; extracellular region; organelle; extracellular exosome; intracellular; cell part; extracellular vesicle; membrane-bounded organelle; extracellular organelle; cytoplasmic part;	enzyme regulator activity; receptor binding; guanyl-nucleotide exchange factor activity; nucleoside-triphosphatase regulator activity; binding; GTPase regulator activity; protein binding; G-protein coupled receptor binding; Ras guanyl-nucleotide exchange factor activity; molecular function regulator; enzyme activator activity; GTPase activator activity; Rho guanyl-nucleotide exchange factor activ…	K07532	ARHGEF12; Rho guanine nucleotide exchange factor 12	hsa04611 Platelet activation - Homo sapiens (human); hsa05152 Tuberculosis - Homo sapiens (human); hsa05205 Proteoglycans in cancer - Homo sapiens (human); hsa05200 Pathways in cancer - Homo sapiens (human); hsa04360 Axon guidance - Homo sapiens (human); hsa04810 Regulation of actin cytoskeleton - Homo sapiens (human); hsa04270 Vascular smooth muscle contraction - Homo sapiens (human);	IPR016137; IPR015212; IPR011993; IPR001478; IPR000219; IPR001849;	RGS domain; Regulator of G protein signalling-like domain; PH domain-like; PDZ domain; Dbl homology (DH) domain; Pleckstrin homology domain;		T	KOG3520	Predicted guanine nucleotide exchange factor
Q5HYI8	110	S	Rab-like protein 3	RABL3	0.263	0.000142	Down	Q1	1	0.000484	101.72	RWS(1)LEALNR	3	0.46849	cytoplasm	regulation of cellular process; single organism signaling; cellular response to stimulus; signal transduction; regulation of biological process; cell communication; intracellular signal transduction; single-organism process; small GTPase mediated signal transduction; signaling; response to stimulus; cellular process; biological regulation;	cell; intracellular; cell part;	nucleoside phosphate binding; nucleoside binding; ion binding; nucleotide binding; heterocyclic compound binding; organic cyclic compound binding; ribonucleoside binding; carbohydrate derivative binding; ribonucleotide binding; binding; purine ribonucleoside binding; anion binding; purine ribonucleotide binding; guanyl ribonucleotide binding; purine nucleoside binding; guanyl nucleotide binding; …	K07933			IPR027417; IPR013684;	P-loop containing nucleoside triphosphate hydrolase; Mitochondrial Rho-like;
P19338	580	S	Nucleolin	NCL	0.264	0.000456	Down	Q1	0.996946	7.58e-10	142.45	GLS(0.997)EDT(0.003)TEETLK	2	-0.62607	nucleus	blood vessel development; positive regulation of biosynthetic process; single-organism process; cellular response to growth factor stimulus; regulation of transcription of nuclear large rRNA transcript from RNA polymerase I promoter; regulation of RNA biosynthetic process; angiogenesis; positive regulation of metabolic process; positive regulation of nitrogen compound metabolic process; response …	membrane; extracellular region part; cell cortex; cell periphery; vesicle; cytoplasm; cytoplasmic region; macromolecular complex; intracellular part; cell; cytoplasmic ribonucleoprotein granule; organelle part; non-membrane-bounded organelle; extracellular exosome; membrane-enclosed lumen; nucleoplasm; intracellular organelle lumen; intracellular; cell part; extracellular vesicle; membrane-bounde…	organic cyclic compound binding; heterocyclic compound binding; DNA binding; RNA binding; identical protein binding; nucleoside phosphate binding; binding; nucleic acid binding; telomeric DNA binding; protein C-terminus binding; protein binding; nucleotide binding; sequence-specific DNA binding; small molecule binding;	K11294	NCL; nucleolin	hsa05130 Pathogenic Escherichia coli infection - Homo sapiens (human);	IPR034230; IPR034235; IPR000504; IPR012677; IPR003954; IPR034233; IPR034234;	Nucleolin, RNA recognition motif 1; Nucleolin, RNA recognition motif 4; RNA recognition motif domain; Nucleotide-binding alpha-beta plait domain; RNA recognition motif domain, eukaryote; Nucleolin, RNA recognition motif 2; Nucleolin, RNA recognition motif 3;	TLE1 corepressor complex (MASH1 promoter-corepressor complex); Nop56p-associated pre-rRNA complex; DGCR8-NCL complex; POLR2A-CCNT1-CDK9-NCL-LEM6-CPSF2 complex; CD28-transactivation complex; DGCR8 multiprotein complex; RNA pol II containing coactivator complex Tat-SF;	AJ	KOG0123	Polyadenylate-binding protein (RRM superfamily)
Q9UPN3	4836	S	Microtubule-actin cross-linking factor 1, isoforms 1/2/3/5	MACF1	0.268	1.34e-05	Down	Q1	1	3.85e-06	105.79	LQS(1)QLQENEEFQK	3	-0.96929	cytoplasm	single organism signaling; regulation of biological quality; cell surface receptor signaling pathway; establishment of protein localization to plasma membrane; protein transport; positive regulation of growth; regulation of cell growth; positive regulation of multicellular organismal process; regulation of localization; regulation of cellular component size; Wnt signaling pathway; protein localiz…	membrane; microtubule; cell periphery; ruffle membrane; cytoplasm; intracellular part; supramolecular fiber; supramolecular complex; cell; organelle part; non-membrane-bounded organelle; cytoskeleton; plasma membrane region; leading edge membrane; microtubule cytoskeleton; membrane part; intracellular; cell part; membrane-bounded organelle; intracellular organelle; cell leading edge; cell project…	actin filament binding; RNA binding; ion binding; macromolecular complex binding; tubulin binding; hydrolase activity, acting on acid anhydrides; hydrolase activity; protein binding; nucleoside-triphosphatase activity; ATPase activity; heterocyclic compound binding; organic cyclic compound binding; cell adhesion molecule binding; cytoskeletal protein binding; pyrophosphatase activity; catalytic a…	K19827			IPR003108; IPR011992; IPR001715; IPR002048;	Gas2-related domain; EF-hand domain pair; Calponin homology domain; EF-hand domain;		Z	KOG0516	Dystonin, GAS (Growth-arrest-specific protein), and related proteins
P08263	202	S	Glutathione S-transferase A1	GSTA1	0.271	0.00842	Down	Q1	1	2.81e-07	142.1	KFLQPGS(1)PR	3	0.080246	cytoplasm	unsaturated fatty acid metabolic process; peptide metabolic process; cellular developmental process; single-organism process; biosynthetic process; cellular lipid metabolic process; organonitrogen compound biosynthetic process; response to stimulus; cellular metabolic process; sulfur compound biosynthetic process; organic substance metabolic process; cell differentiation; glutathione derivative m…	extracellular exosome; organelle; extracellular region part; cell part; intracellular; cytoplasm; vesicle; extracellular vesicle; intracellular part; cytosol; cell; membrane-bounded organelle; extracellular region; extracellular organelle; cytoplasmic part;	glutathione transferase activity; glutathione peroxidase activity; catalytic activity; binding; transferase activity, transferring alkyl or aryl (other than methyl) groups; antioxidant activity; protein binding; peroxidase activity; transferase activity; oxidoreductase activity, acting on peroxide as acceptor; oxidoreductase activity;	K00799	GST; glutathione S-transferase [EC:2.5.1.18]	hsa01524 Platinum drug resistance - Homo sapiens (human); hsa00480 Glutathione metabolism - Homo sapiens (human); hsa05200 Pathways in cancer - Homo sapiens (human); hsa05204 Chemical carcinogenesis - Homo sapiens (human); hsa00980 Metabolism of xenobiotics by cytochrome P450 - Homo sapiens (human); hsa05418 Fluid shear stress and atherosclerosis - Homo sapiens (human); hsa00982 Drug metabolism -…	IPR010987; IPR004046; IPR004045; IPR012336;	Glutathione S-transferase, C-terminal-like; Glutathione S-transferase, C-terminal; Glutathione S-transferase, N-terminal; Thioredoxin-like fold;		O	KOG1695	Glutathione S-transferase
P63261	203	T	Actin, cytoplasmic 2	ACTG1	0.272	8.22e-05	Down	Q1	0.998803	3.59e-10	160.62	GYSFTT(0.001)T(0.999)AER	2	0.0035409	cytoskeleton	single organism signaling; cellular component biogenesis; blood coagulation; regulation of biological quality; cell surface receptor signaling pathway; Fc-gamma receptor signaling pathway; cellular developmental process; cellular component morphogenesis; single-organism process; multicellular organismal homeostasis; establishment of localization; phagocytosis; response to wounding; biological adh…	membrane; extracellular space; extracellular region part; cell periphery; cell junction; myofibril; vesicle; cytoplasm; macromolecular complex; intracellular part; supramolecular fiber; cell; supramolecular complex; organelle part; non-membrane-bounded organelle; cytoskeleton; extracellular exosome; focal adhesion; myelin sheath; intracellular; cell part; adherens junction; extracellular vesicle;…	ATP binding; nucleoside phosphate binding; ubiquitin protein ligase binding; nucleoside binding; ion binding; protein binding; nucleotide binding; organic cyclic compound binding; heterocyclic compound binding; ribonucleoside binding; carbohydrate derivative binding; identical protein binding; structural constituent of cytoskeleton; ribonucleotide binding; binding; purine ribonucleoside binding; …	K05692	ACTB_G1; actin beta/gamma 1	hsa04921 Oxytocin signaling pathway - Homo sapiens (human); hsa05100 Bacterial invasion of epithelial cells - Homo sapiens (human); hsa05132 Salmonella infection - Homo sapiens (human); hsa04015 Rap1 signaling pathway - Homo sapiens (human); hsa04210 Apoptosis - Homo sapiens (human); hsa04530 Tight junction - Homo sapiens (human); hsa05130 Pathogenic Escherichia coli infection - Homo sapiens (hum…			PBAF complex (Polybromo- and BAF containing complex); Profilin 1 complex; BAF complex; Alpha-dystrobrevin-ZO-1-actin complex; CTGF/Hcs24-actin complex;	Z	KOG0676	Actin and related proteins
Q6DN90	88	T	IQ motif and SEC7 domain-containing protein 1	IQSEC1	0.273	0.0161	Down	Q1	0.903891	3.71e-07	141.44	LQHS(0.093)T(0.904)S(0.004)ILR	3	0.015403	cytoplasm	regulation of cellular process; cellular component organization; regulation of intracellular signal transduction; positive regulation of GTPase activity; regulation of signaling; single-organism cellular process; single-organism process; regulation of Ras protein signal transduction; positive regulation of catalytic activity; single-organism organelle organization; actin cytoskeleton organization…	membrane; intracellular organelle; intracellular non-membrane-bounded organelle; intracellular organelle part; cytoplasm; nuclear lumen; intracellular part; nucleolus; cell; organelle part; non-membrane-bounded organelle; organelle; intracellular membrane-bounded organelle; membrane-enclosed lumen; nucleus; intracellular organelle lumen; intracellular; cell part; membrane-bounded organelle; organ…	lipid binding; protein binding; molecular function regulator; ARF guanyl-nucleotide exchange factor activity; guanyl-nucleotide exchange factor activity; binding;	K12495	IQSEC; IQ motif and SEC7 domain-containing protein	hsa04144 Endocytosis - Homo sapiens (human);	IPR023394; IPR033742; IPR011993; IPR000904; IPR001849;	Sec7 domain, alpha orthogonal bundle; IQ motif and SEC7 domain-containing protein, PH domain; PH domain-like; Sec7 domain; Pleckstrin homology domain;		U	KOG0931	Predicted guanine nucleotide exchange factor, contains Sec7 domain
O43493	224	S	Trans-Golgi network integral membrane protein 2	TGOLN2	0.275	0.000589	Down	Q1	0.937872	4.66e-18	134.63	DGS(0.062)NKS(0.938)GAEEQGPIDGPSK	3	-0.19195	extracellular	cellular component organization; intracellular transport; Golgi to endosome transport; vesicle-mediated transport; Golgi vesicle transport; establishment of localization; cellular localization; endosomal transport; transport; establishment of localization in cell; membrane organization; localization; cytosolic transport; post-Golgi vesicle-mediated transport; cellular process; cellular component …	membrane; organelle membrane; cytoplasmic vesicle; cell periphery; cytoplasm; vesicle; cytoplasmic vesicle part; intrinsic component of membrane; intracellular part; cell; coated vesicle membrane; organelle part; membrane-enclosed lumen; nucleoplasm; trans-Golgi network transport vesicle; intracellular organelle lumen; clathrin-coated vesicle; membrane part; intracellular; cell part; whole membra…	protein binding; binding;
P55196	1721	S	Afadin	AFDN	0.275	0.0172	Down	Q1	0.986728	8.55e-11	145.69	T(0.012)QVLS(0.987)PDS(0.002)LFTAK	3	0.85132	nucleus	regulation of cellular process; single organism signaling; cellular component organization; cellular developmental process; cell-cell junction organization; single-organism process; response to stimulus; endothelial cell differentiation; cell development; biological adhesion; signal transduction; cell differentiation; cell communication; positive regulation of hydrolase activity; regulation of lo…	intracellular organelle; membrane; cell periphery; cell junction; intracellular organelle part; cytoplasm; anchoring junction; nuclear lumen; intracellular part; nuclear body; cell-cell junction; cytosol; cell; organelle part; plasma membrane; membrane-enclosed lumen; intracellular membrane-bounded organelle; organelle; nucleus; nucleoplasm; intracellular organelle lumen; nuclear speck; intracell…	small GTPase binding; cell adhesion molecule binding; Ras GTPase binding; binding; cadherin binding; protein binding; protein C-terminus binding; GTPase binding; enzyme binding;	K05702	AF6; afadin	hsa04024 cAMP signaling pathway - Homo sapiens (human); hsa04670 Leukocyte transendothelial migration - Homo sapiens (human); hsa04015 Rap1 signaling pathway - Homo sapiens (human); hsa04520 Adherens junction - Homo sapiens (human); hsa04530 Tight junction - Homo sapiens (human); hsa04014 Ras signaling pathway - Homo sapiens (human);	IPR002710; IPR008984; IPR029071; IPR001478; IPR000253; IPR000159;	Dilute domain; SMAD/FHA domain; Ubiquitin-related domain; PDZ domain; Forkhead-associated (FHA) domain; Ras-associating (RA) domain;		Z	KOG1892	Actin filament-binding protein Afadin
Q6UXT9	434	S	Protein ABHD15	ABHD15	0.275	0.043	Down	Q1	1	0.000342	119.74	HRAS(1)FLGGR	3	-0.73017	extracellular	metabolic process; single-organism metabolic process; single-organism cellular process; single-organism process; cellular lipid metabolic process; primary metabolic process; cellular process; cellular metabolic process; organic substance metabolic process; lipid metabolic process;	membrane; extracellular region;	hydrolase activity; catalytic activity; hydrolase activity, acting on ester bonds;	K13707			IPR029058; IPR022742;	Alpha/Beta hydrolase fold; Serine aminopeptidase, S33;		R	KOG1838	Alpha/beta hydrolase
Q6DN90	180	S	IQ motif and SEC7 domain-containing protein 1	IQSEC1	0.285	0.00643	Down	Q1	1	0.000286	103.76	MQFS(1)FEGPEK	2	0.68729	cytoplasm	regulation of cellular process; cellular component organization; regulation of intracellular signal transduction; positive regulation of GTPase activity; regulation of signaling; single-organism cellular process; single-organism process; regulation of Ras protein signal transduction; positive regulation of catalytic activity; single-organism organelle organization; actin cytoskeleton organization…	membrane; intracellular organelle; intracellular non-membrane-bounded organelle; intracellular organelle part; cytoplasm; nuclear lumen; intracellular part; nucleolus; cell; organelle part; non-membrane-bounded organelle; organelle; intracellular membrane-bounded organelle; membrane-enclosed lumen; nucleus; intracellular organelle lumen; intracellular; cell part; membrane-bounded organelle; organ…	lipid binding; protein binding; molecular function regulator; ARF guanyl-nucleotide exchange factor activity; guanyl-nucleotide exchange factor activity; binding;	K12495	IQSEC; IQ motif and SEC7 domain-containing protein	hsa04144 Endocytosis - Homo sapiens (human);	IPR023394; IPR033742; IPR011993; IPR000904; IPR001849;	Sec7 domain, alpha orthogonal bundle; IQ motif and SEC7 domain-containing protein, PH domain; PH domain-like; Sec7 domain; Pleckstrin homology domain;		U	KOG0931	Predicted guanine nucleotide exchange factor, contains Sec7 domain
Q15149	4030	T	Plectin	PLEC	0.286	0.012	Down	Q1	1	0.000142	121.24	KQIT(1)MEELVR	3	-0.81522	cytoplasm,nucleus	cellular component biogenesis; cellular component organization; cell junction assembly; cell-substrate junction assembly; cell junction organization; cellular component assembly; hemidesmosome assembly; single-organism cellular process; single-organism process; cellular process; cellular component organization or biogenesis;	membrane; extracellular region part; cluster of actin-based cell projections; brush border; cell periphery; cell junction; myofibril; vesicle; cytoplasm; supramolecular fiber; intracellular part; supramolecular complex; sarcoplasm; cell; organelle part; non-membrane-bounded organelle; cytoskeleton; extracellular exosome; focal adhesion; cell part; intracellular; contractile fiber; adherens juncti…	organic cyclic compound binding; heterocyclic compound binding; cell adhesion molecule binding; RNA binding; cytoskeletal protein binding; binding; cadherin binding; nucleic acid binding; actin binding; protein binding; structural constituent of muscle; ankyrin binding; structural molecule activity;	K10388			IPR001715; IPR005326;	Calponin homology domain; Plectin/S10, N-terminal;		J	KOG3344	40s ribosomal protein s10
Q8N6H7	368	S	ADP-ribosylation factor GTPase-activating protein 2	ARFGAP2	0.295	0.00246	Down	Q1	0.982601	0.000176	84.375	DNPFSLGES(0.983)FGS(0.017)R	2	-0.037903	nucleus	intracellular transport; positive regulation of GTPase activity; vesicle-mediated transport; Golgi vesicle transport; organic substance transport; protein transport; cellular localization; positive regulation of catalytic activity; establishment of localization; establishment of protein localization; transport; establishment of localization in cell; regulation of hydrolase activity; positive regu…	intracellular organelle; membrane; bounding membrane of organelle; organelle membrane; cell periphery; intracellular organelle part; cytoplasm; Golgi membrane; endomembrane system; intracellular part; cytosol; cell; organelle part; plasma membrane; organelle; intracellular membrane-bounded organelle; intracellular; cell part; Golgi apparatus part; Golgi apparatus; membrane-bounded organelle; cyto…	enzyme regulator activity; nucleoside-triphosphatase regulator activity; binding; GTPase regulator activity; ion binding; cation binding; metal ion binding; molecular function regulator; enzyme activator activity; GTPase activator activity;	K12493	ARFGAP2_3; ADP-ribosylation factor GTPase-activating protein 2/3	hsa04144 Endocytosis - Homo sapiens (human);				T	KOG0706	Predicted GTPase-activating protein
Q15126	66	S	Phosphomevalonate kinase	PMVK	0.298	0.00243	Down	Q1	0.811243	0.00144	113.93	LLDT(0.059)S(0.811)T(0.13)YK	2	0.34519	cytoplasm	phosphorylation; isopentenyl diphosphate biosynthetic process, mevalonate pathway; organic hydroxy compound metabolic process; secondary alcohol metabolic process; alcohol metabolic process; secondary alcohol biosynthetic process; response to oxygen-containing compound; phospholipid biosynthetic process; single-organism process; cellular lipid metabolic process; biosynthetic process; response to …	intracellular organelle; membrane; extracellular region part; peroxisome; vesicle; cytoplasm; intracellular part; cytosol; cell; extracellular region; intracellular membrane-bounded organelle; organelle; extracellular exosome; intracellular; cell part; microbody; extracellular vesicle; membrane-bounded organelle; extracellular organelle; cytoplasmic part;	ATP binding; nucleoside phosphate binding; nucleoside binding; ion binding; nucleotide binding; phosphotransferase activity, phosphate group as acceptor; organic cyclic compound binding; heterocyclic compound binding; ribonucleoside binding; carbohydrate derivative binding; kinase activity; catalytic activity; ribonucleotide binding; phosphomevalonate kinase activity; binding; purine ribonucleosi…	K13273	PMVK; phosphomevalonate kinase [EC:2.7.4.2]	hsa01100 Metabolic pathways - Homo sapiens (human); hsa00900 Terpenoid backbone biosynthesis - Homo sapiens (human); hsa04146 Peroxisome - Homo sapiens (human);	IPR027417;	P-loop containing nucleoside triphosphate hydrolase;
O60240	382	S	Perilipin-1	PLIN1	0.301	0.0114	Down	Q1	0.998711	2.22e-05	132.32	AMS(0.999)LS(0.001)DALK	2	0.19922	nucleus	lipid catabolic process; organic substance catabolic process; metabolic process; single-organism metabolic process; single-organism catabolic process; single-organism process; primary metabolic process; catabolic process; organic substance metabolic process; lipid metabolic process;	intracellular organelle; endoplasmic reticulum; intracellular non-membrane-bounded organelle; cytoplasm; endomembrane system; intracellular part; cytosol; cell; non-membrane-bounded organelle; intracellular membrane-bounded organelle; organelle; intracellular; cell part; membrane-bounded organelle; lipid particle; cytoplasmic part;	lipid binding; binding;	K08768	PLIN1; perilipin-1	hsa04923 Regulation of lipolysis in adipocytes - Homo sapiens (human); hsa03320 PPAR signaling pathway - Homo sapiens (human);
P52565	34	S	Rho GDP-dissociation inhibitor 1	ARHGDIA	0.302	0.0111	Down	Q1	1	7.5e-27	181.75	S(1)IQEIQELDKDDESLR	3	0.25959	cytoplasm	single organism signaling; negative regulation of developmental process; positive regulation of neuron differentiation; regulation of cell death; cell surface receptor signaling pathway; regulation of signaling; negative regulation of cellular component organization; cellular developmental process; negative regulation of multicellular organismal process; neurogenesis; single-organism process; pos…	intracellular organelle; extracellular region part; intracellular non-membrane-bounded organelle; vesicle; cytoplasm; intracellular part; cell; cytosol; extracellular region; non-membrane-bounded organelle; organelle; cytoskeleton; extracellular exosome; intracellular; cell part; extracellular vesicle; membrane-bounded organelle; extracellular organelle; cytoplasmic part;	Rho GDP-dissociation inhibitor activity; enzyme regulator activity; nucleoside-triphosphatase regulator activity; GDP-dissociation inhibitor activity; binding; GTPase regulator activity; protein binding; molecular function regulator; enzyme activator activity; GTPase activator activity;	K12462	ARHGDI; Rho GDP-dissociation inhibitor	hsa04722 Neurotrophin signaling pathway - Homo sapiens (human); hsa04962 Vasopressin-regulated water reabsorption - Homo sapiens (human);	IPR014756; IPR024792;	Immunoglobulin E-set; Rho GDP-dissociation inhibitor domain;		T	KOG3205	Rho GDP-dissociation inhibitor
P98194	913	S	Calcium-transporting ATPase type 2C member 1	ATP2C1	0.302	0.000339	Down	Q1	0.750697	0.00319	61.03	HVS(0.009)S(0.031)T(0.147)S(0.751)S(0.051)S(0.011)FLEV	2	-2.3933	plasma membrane	single organism signaling; manganese ion transmembrane transport; regulation of biological quality; cellular divalent inorganic cation homeostasis; ATP hydrolysis coupled transmembrane transport; regulation of signaling; positive regulation of intracellular signal transduction; single-organism process; establishment of localization; biological adhesion; transition metal ion transport; signal tran…	intracellular organelle; membrane; bounding membrane of organelle; organelle membrane; cytoplasm; intracellular organelle part; Golgi membrane; intrinsic component of membrane; endomembrane system; intracellular part; cell; integral component of membrane; organelle part; organelle; intracellular membrane-bounded organelle; membrane part; cell part; intracellular; Golgi subcompartment; trans-Golgi…	ATPase coupled ion transmembrane transporter activity; nucleoside phosphate binding; primary active transmembrane transporter activity; manganese-transporting ATPase activity; substrate-specific transporter activity; hydrolase activity, acting on acid anhydrides; hydrolase activity; signal transducer activity; substrate-specific transmembrane transporter activity; ATPase activity; organic cyclic …	K01537			IPR023298; IPR004014; IPR008250; IPR023214; IPR006068;	P-type ATPase, transmembrane domain; Cation-transporting P-type ATPase, N-terminal; P-type ATPase, A domain; HAD-like domain; Cation-transporting P-type ATPase, C-terminal;		P	KOG0202	Ca2+ transporting ATPase
Q9Y2H5	448	S	Pleckstrin homology domain-containing family A member 6	PLEKHA6	0.302	0.0456	Down	Q1	1	0.000267	105.1	RLS(1)LQPR	2	-0.2524	nucleus							IPR011993; IPR001849;	PH domain-like; Pleckstrin homology domain;		F	KOG1738	Membrane-associated guanylate kinase-interacting protein/connector enhancer of KSR-like
Q96RR4	100	S	Calcium/calmodulin-dependent protein kinase kinase 2	CAMKK2	0.304	0.0231	Down	Q1	1	0.000838	85.355	KLS(1)LQER	3	0.04421	nucleus	single organism signaling; positive regulation of cellular protein metabolic process; peptidyl-serine modification; positive regulation of cellular catabolic process; positive regulation of biosynthetic process; single-organism process; peptidyl-tyrosine modification; regulation of mitochondrion organization; cellular metabolic process; phosphate-containing compound metabolic process; positive re…	organelle; intracellular membrane-bounded organelle; intracellular organelle; nucleus; cell projection; intracellular; cell part; cytoplasm; intracellular part; membrane-bounded organelle; cell; cytosol; cytoplasmic part;	nucleoside phosphate binding; phosphotransferase activity, alcohol group as acceptor; protein tyrosine kinase activity; protein binding; calmodulin-dependent protein kinase activity; protein kinase activity; organic cyclic compound binding; heterocyclic compound binding; kinase activity; catalytic activity; ribonucleotide binding; binding; purine ribonucleoside binding; cation binding; anion bind…	K07359	CAMKK2; calcium/calmodulin-dependent protein kinase kinase 2 [EC:2.7.11.17]	hsa04921 Oxytocin signaling pathway - Homo sapiens (human); hsa04920 Adipocytokine signaling pathway - Homo sapiens (human); hsa05034 Alcoholism - Homo sapiens (human); hsa04211 Longevity regulating pathway - Homo sapiens (human); hsa04152 AMPK signaling pathway - Homo sapiens (human); hsa04140 Autophagy - animal - Homo sapiens (human);	IPR000719; IPR011009;	Protein kinase domain; Protein kinase-like domain;		T	KOG0585	Ca2+/calmodulin-dependent protein kinase kinase beta and related serine/threonine protein kinases
Q96TA1	691	S	Niban-like protein 1	FAM129B	0.305	0.0198	Down	Q1	0.840071	5.84e-07	78.078	AAPEAS(0.84)S(0.863)PPAS(0.297)PLQHLLPGK	4	-0.56306	cytoplasm	regulation of cellular process; regulation of cell death; regulation of biological process; negative regulation of programmed cell death; negative regulation of apoptotic process; regulation of programmed cell death; negative regulation of cellular process; negative regulation of biological process; negative regulation of cell death; regulation of apoptotic process; biological regulation;	membrane; extracellular region part; cell periphery; cell junction; cytoplasm; vesicle; intracellular part; cell; organelle part; membrane-enclosed lumen; extracellular exosome; nucleoplasm; intracellular organelle lumen; intracellular; cell part; adherens junction; extracellular vesicle; membrane-bounded organelle; organelle lumen; intracellular organelle; intracellular organelle part; anchoring…	cell adhesion molecule binding; protein binding; binding; cadherin binding;				IPR011993; IPR001849;	PH domain-like; Pleckstrin homology domain;
P40855	134	S	Peroxisomal biogenesis factor 19	PEX19	0.306	0.0315	Down	Q1	0.988275	0.00144	88.596	ET(0.012)LS(0.988)GLAK	3	-0.59475	cytoplasm	cellular component biogenesis; intracellular transport; peroxisome membrane biogenesis; cellular component organization; regulation of biological quality; peroxisomal membrane transport; establishment of protein localization to organelle; protein import; organelle fission; chaperone-mediated protein folding; single-organism process; establishment of protein localization to peroxisome; protein tra…	membrane; cluster of actin-based cell projections; brush border; organelle membrane; cell periphery; cytoplasm; macromolecular complex; microbody part; intrinsic component of membrane; intracellular part; cell; organelle part; peroxisomal membrane; membrane-enclosed lumen; nucleoplasm; intracellular organelle lumen; plasma membrane region; intracellular; membrane part; cell part; whole membrane; …	signal sequence binding; protein N-terminus binding; peptide binding; ATPase binding; binding; peroxisome targeting sequence binding; protein binding; amide binding; enzyme binding; peroxisome membrane targeting sequence binding; peroxisome membrane class-1 targeting sequence binding;	K13337	PEX19; peroxin-19	hsa04146 Peroxisome - Homo sapiens (human);				U	KOG3133	40 kDa farnesylated protein associated with peroxisomes
Q8WWI1	1493	S	LIM domain only protein 7	LMO7	0.306	0.027	Down	Q1	0.778949	0.000804	61.862	S(0.217)AS(0.779)VNKEPVS(0.004)LPGIMR	3	-0.02546	nucleus	protein ubiquitination; regulation of signaling; cellular protein metabolic process; protein modification by small protein conjugation or removal; primary metabolic process; cellular metabolic process; regulation of cell adhesion; protein polyubiquitination; organic substance metabolic process; metabolic process; regulation of biological process; protein modification by small protein conjugation;…	intracellular organelle; cell junction; cytoplasm; anchoring junction; macromolecular complex; intracellular part; transferase complex; cytosol; cell; intracellular membrane-bounded organelle; organelle; catalytic complex; nucleus; focal adhesion; intracellular; cell part; adherens junction; cell-substrate junction; ubiquitin ligase complex; membrane-bounded organelle; cytoplasmic part; cell-subs…	transition metal ion binding; ubiquitin-like protein transferase activity; catalytic activity; binding; ion binding; ubiquitin-protein transferase activity; cation binding; metal ion binding; protein binding; zinc ion binding; transferase activity;	K06084	LMO7; F-box protein 20	hsa04520 Adherens junction - Homo sapiens (human);	IPR001781; IPR031865; IPR001715; IPR001478;	Zinc finger, LIM-type; Domain of unknown function DUF4757; Calponin homology domain; PDZ domain;	Emerin regulatory complex; Emerin complex 1;	TZR	KOG1704	FOG: LIM domain
Q96N67	888	S	Dedicator of cytokinesis protein 7	DOCK7	0.307	0.0252	Down	Q1	0.999966	6e-07	120.75	SAVRPAS(1)LNLNR	3	-0.015601	nucleus	single organism signaling; positive regulation of cell migration; positive regulation of cellular protein metabolic process; brain development; nucleus localization; cellular component morphogenesis; regulation of localization; positive regulation of molecular function; positive regulation of phosphorylation; positive regulation of phosphorus metabolic process; positive regulation of peptidyl-ser…	cell projection; cell junction; anchoring junction; growth cone; cell; site of polarized growth; cell projection part; axon; focal adhesion; intracellular; cell part; adherens junction; neuron projection; cell-substrate junction; neuron part; cell-substrate adherens junction; basal part of cell;	small GTPase binding; Rho GTPase binding; Rac GTPase binding; guanyl-nucleotide exchange factor activity; Ras GTPase binding; binding; protein binding; molecular function regulator; GTPase binding; enzyme binding;				IPR021816; IPR027357; IPR010703; IPR027007;	Dedicator of cytokinesis C/D, N-terminal; DHR-2 domain; Dedicator of cytokinesis, C-terminal; DHR-1 domain;		T	KOG1997	PH domain-containing protein
O00443	338	S	Phosphatidylinositol 4-phosphate 3-kinase C2 domain-containing subunit alpha	PIK3C2A	0.313	0.00359	Down	Q1	0.960259	0.0219	66.321	S(0.04)QS(0.96)LNIR	2	0.096794	cytoplasm	cellular component biogenesis; single organism signaling; muscle system process; regulation of biological quality; insulin receptor signaling pathway; platelet-derived growth factor receptor signaling pathway; glycerolipid metabolic process; cell surface receptor signaling pathway; phosphatidylinositol phosphorylation; phospholipid biosynthetic process; single-organism process; cellular lipid met…	membrane; extracellular region part; transferase complex, transferring phosphorus-containing groups; extrinsic component of membrane; cytoplasmic vesicle; cell periphery; cytoplasm; vesicle; macromolecular complex; intracellular part; cell; extracellular exosome; catalytic complex; clathrin-coated vesicle; membrane part; intracellular; cell part; extracellular vesicle; membrane-bounded organelle;…	nucleoside phosphate binding; phosphotransferase activity, alcohol group as acceptor; protein binding; organic cyclic compound binding; heterocyclic compound binding; kinase activity; catalytic activity; ribonucleotide binding; binding; phosphatidylinositol binding; purine ribonucleoside binding; lipid binding; anion binding; 1-phosphatidylinositol-4-phosphate 3-kinase activity; adenyl ribonucleo…	K00923	PIK3C2; phosphatidylinositol-4-phosphate 3-kinase [EC:2.7.1.154]	hsa00562 Inositol phosphate metabolism - Homo sapiens (human); hsa01100 Metabolic pathways - Homo sapiens (human); hsa04070 Phosphatidylinositol signaling system - Homo sapiens (human);	IPR001263; IPR000403; IPR002420; IPR029071; IPR016024; IPR001683; IPR000341; IPR000008; IPR011009;	Phosphoinositide 3-kinase, accessory (PIK) domain; Phosphatidylinositol 3-/4-kinase, catalytic domain; Phosphatidylinositol 3-kinase, C2 domain; Ubiquitin-related domain; Armadillo-type fold; Phox homologous domain; Phosphatidylinositol 3-kinase Ras-binding (PI3K RBD) domain; C2 domain; Protein kinase-like domain;	EGFR-containing signaling complex;	T	KOG0905	Phosphoinositide 3-kinase
P22626	189	S	Heterogeneous nuclear ribonucleoproteins A2/B1	HNRNPA2B1	0.314	0.0203	Down	Q1	0.999992	0.000355	62.002	KALS(1)RQEMQEVQSSR	3	0.46017	nucleus	RNA transport; regulation of biological quality; positive regulation of telomerase activity; posttranscriptional regulation of gene expression; positive regulation of biosynthetic process; negative regulation of mRNA processing; nuclear transport; regulation of telomere maintenance; cellular metabolic process; protein transport; metabolic process; nucleobase-containing compound transport; positiv…	membrane; extracellular region part; chromosome, telomeric region; vesicle; cytoplasm; macromolecular complex; intracellular part; nuclear body; cell; Cajal body; organelle part; chromosomal part; non-membrane-bounded organelle; extracellular exosome; membrane-enclosed lumen; catalytic complex; nucleoplasm; intracellular organelle lumen; intracellular; cell part; chromosome; extracellular vesicle…	DNA binding; RNA binding; nucleoside phosphate binding; pre-mRNA intronic binding; mRNA 3'-UTR binding; sequence-specific single stranded DNA binding; telomeric DNA binding; single-stranded DNA binding; protein binding; nucleotide binding; sequence-specific DNA binding; single-stranded telomeric DNA binding; N6-methyladenosine-containing RNA binding; heterocyclic compound binding; organic cyclic …	K13158			IPR000504; IPR012677;	RNA recognition motif domain; Nucleotide-binding alpha-beta plait domain;	p23 protein complex; C complex spliceosome;	R	KOG0118	FOG: RRM domain
Q96TA1	692	S	Niban-like protein 1	FAM129B	0.314	0.0196	Down	Q1	0.89298	5.3e-13	120.32	AAPEAS(0.107)S(0.893)PPAS(1)PLQHLLPGK	3	0.25491	cytoplasm	regulation of cellular process; regulation of cell death; regulation of biological process; negative regulation of programmed cell death; negative regulation of apoptotic process; regulation of programmed cell death; negative regulation of cellular process; negative regulation of biological process; negative regulation of cell death; regulation of apoptotic process; biological regulation;	membrane; extracellular region part; cell periphery; cell junction; cytoplasm; vesicle; intracellular part; cell; organelle part; membrane-enclosed lumen; extracellular exosome; nucleoplasm; intracellular organelle lumen; intracellular; cell part; adherens junction; extracellular vesicle; membrane-bounded organelle; organelle lumen; intracellular organelle; intracellular organelle part; anchoring…	cell adhesion molecule binding; protein binding; binding; cadherin binding;				IPR011993; IPR001849;	PH domain-like; Pleckstrin homology domain;
P23246	283	S	Splicing factor, proline- and glutamine-rich	SFPQ	0.315	0.000236	Down	Q1	1	0.00625	78.939	ANLS(1)LLR	2	0.30206	nucleus	regulation of cell death; nucleic acid-templated transcription; positive regulation of biosynthetic process; regulation of cell cycle process; cellular metabolic process; metabolic process; protein metabolic process; macromolecule metabolic process; negative regulation of macromolecule biosynthetic process; positive regulation of cell cycle process; protein deacetylation; RNA processing; cellular…	extracellular region part; cytoplasm; macromolecular complex; intracellular part; nuclear body; cell; organelle part; chromosomal part; non-membrane-bounded organelle; membrane-enclosed lumen; nucleoplasm; intracellular organelle lumen; nuclear speck; intracellular; cell part; chromosome; membrane-bounded organelle; nucleoplasm part; organelle lumen; intracellular organelle; intracellular non-mem…	RNA binding; DNA binding; nucleoside phosphate binding; enhancer sequence-specific DNA binding; transcription regulatory region sequence-specific DNA binding; double-stranded DNA binding; protein dimerization activity; sequence-specific double-stranded DNA binding; RNA polymerase II regulatory region DNA binding; protein binding; nucleotide binding; chromatin binding; sequence-specific DNA bindin…	K13219			IPR012975; IPR000504; IPR012677;	NOPS; RNA recognition motif domain; Nucleotide-binding alpha-beta plait domain;	TOP1-PSF-P54 complex; p54(nrb)-PSF-matrin3 complex; snRNP-free U1A (SF-A) complex; CF IIAm complex (Cleavage factor IIAm complex); CDC5L complex; PSF-p54(nrb) complex; SNW1 complex;	A	KOG0115	RNA-binding protein p54nrb (RRM superfamily)
Q9HCE6	1257	S	Rho guanine nucleotide exchange factor 10-like protein	ARHGEF10L	0.315	0.00142	Down	Q1	0.978009	0.00224	66.674	NFGSALGS(0.022)S(0.978)GR	2	-0.89926	nucleus	regulation of cellular process; regulation of intracellular signal transduction; positive regulation of GTPase activity; regulation of signaling; regulation of Ras protein signal transduction; positive regulation of catalytic activity; regulation of cell communication; regulation of biological process; regulation of hydrolase activity; positive regulation of hydrolase activity; regulation of cata…	intracellular part; cell; cell part; intracellular; cytoplasm;	Ras guanyl-nucleotide exchange factor activity; protein binding; molecular function regulator; guanyl-nucleotide exchange factor activity; binding; Rho guanyl-nucleotide exchange factor activity;	K16727			IPR017986; IPR011993; IPR015943; IPR000219;	WD40-repeat-containing domain; PH domain-like; WD40/YVTN repeat-like-containing domain; Dbl homology (DH) domain;		T	KOG3522	Predicted guanine nucleotide exchange factor
O95292	158	S	Vesicle-associated membrane protein-associated protein B/C	VAPB	0.317	0.000881	Down	Q1	0.803265	5.8e-27	194.98	S(0.082)LS(0.803)S(0.115)S(0.001)LDDTEVKK	4	0.016868	cytoplasm	single organism signaling; regulation of biological quality; positive regulation of cellular protein metabolic process; modulation by host of viral genome replication; cellular lipid metabolic process; cellular metabolic process; lipid biosynthetic process; metabolic process; response to topologically incorrect protein; sphingolipid biosynthetic process; positive regulation of molecular function;…	intracellular organelle; membrane; nuclear outer membrane-endoplasmic reticulum membrane network; endoplasmic reticulum; bounding membrane of organelle; organelle membrane; intracellular organelle part; cytoplasm; Golgi membrane; intrinsic component of membrane; endomembrane system; intracellular part; cell; integral component of membrane; organelle part; intracellular membrane-bounded organelle;…	cell adhesion molecule binding; identical protein binding; cytoskeletal protein binding; protein heterodimerization activity; protein homodimerization activity; microtubule binding; binding; FFAT motif binding; protein dimerization activity; cadherin binding; tubulin binding; protein domain specific binding; protein binding; beta-tubulin binding; enzyme binding;	K10707			IPR008962; IPR000535;	PapD-like; Major sperm protein (MSP) domain;		U	KOG0439	VAMP-associated protein involved in inositol metabolism
P49006	104	S	MARCKS-related protein	MARCKSL1	0.317	0.0258	Down	Q1	0.99999	0.000824	83.862	LSGLS(1)FKR	3	0.15286	nucleus	regulation of cellular process; regulation of biological process; regulation of cell proliferation; positive regulation of cellular process; positive regulation of biological process; biological regulation; positive regulation of cell proliferation;	membrane; extracellular region part; cell periphery; cytoplasm; vesicle; intracellular part; cell; extracellular region; plasma membrane; organelle; extracellular exosome; intracellular; cell part; extracellular vesicle; membrane-bounded organelle; extracellular organelle;	actin binding; protein binding; cytoskeletal protein binding; calmodulin binding; binding;	K13536	MARCKSL1; MARCKS-related protein	hsa04666 Fc gamma R-mediated phagocytosis - Homo sapiens (human); hsa05140 Leishmaniasis - Homo sapiens (human);
Q9BXB4	15	S	Oxysterol-binding protein-related protein 11	OSBPL11	0.327	0.038	Down	Q1	0.988701	3.26e-18	134.34	VS(0.011)ES(0.989)EGKLEGQATAVTPNK	3	0.024677	nucleus	developmental process; regulation of biological quality; regulation of sequestering of triglyceride; lipid transport; positive regulation of sequestering of triglyceride; positive regulation of lipid storage; cellular developmental process; single-organism cellular process; single-organism process; organic substance transport; lipid localization; positive regulation of biological process; establi…	membrane; cytoplasmic vesicle; organelle membrane; cytoplasm; vesicle; cytoplasmic vesicle part; intracellular part; cell; organelle part; membrane-enclosed lumen; nucleoplasm; intracellular organelle lumen; late endosome membrane; cell part; intracellular; whole membrane; endosome; membrane-bounded organelle; organelle lumen; intracellular organelle; intracellular vesicle; endosome membrane; lat…	lipid binding; binding;	K20465			IPR011993; IPR001849;	PH domain-like; Pleckstrin homology domain;		T	KOG2210	Oxysterol-binding protein
Q6DN90	89	S	IQ motif and SEC7 domain-containing protein 1	IQSEC1	0.328	0.008	Down	Q1	0.87184	0.000339	99.752	LQHS(0.016)T(0.112)S(0.872)ILR	2	-2.4344	cytoplasm	regulation of cellular process; cellular component organization; regulation of intracellular signal transduction; positive regulation of GTPase activity; regulation of signaling; single-organism cellular process; single-organism process; regulation of Ras protein signal transduction; positive regulation of catalytic activity; single-organism organelle organization; actin cytoskeleton organization…	membrane; intracellular organelle; intracellular non-membrane-bounded organelle; intracellular organelle part; cytoplasm; nuclear lumen; intracellular part; nucleolus; cell; organelle part; non-membrane-bounded organelle; organelle; intracellular membrane-bounded organelle; membrane-enclosed lumen; nucleus; intracellular organelle lumen; intracellular; cell part; membrane-bounded organelle; organ…	lipid binding; protein binding; molecular function regulator; ARF guanyl-nucleotide exchange factor activity; guanyl-nucleotide exchange factor activity; binding;	K12495	IQSEC; IQ motif and SEC7 domain-containing protein	hsa04144 Endocytosis - Homo sapiens (human);	IPR023394; IPR033742; IPR011993; IPR000904; IPR001849;	Sec7 domain, alpha orthogonal bundle; IQ motif and SEC7 domain-containing protein, PH domain; PH domain-like; Sec7 domain; Pleckstrin homology domain;		U	KOG0931	Predicted guanine nucleotide exchange factor, contains Sec7 domain
P09525	297	S	Annexin A4	ANXA4	0.331	0.00584	Down	Q1	0.995465	0.0109	73.233	S(0.004)LYS(0.995)FIK	2	0.76715	cytoplasm	single organism signaling; regulation of cell death; negative regulation of sequence-specific DNA binding transcription factor activity; cell surface receptor signaling pathway; cellular developmental process; negative regulation of multicellular organismal process; regulation of secretion; single-organism process; negative regulation of cytokine production; negative regulation of cytokine secret…	intracellular organelle; membrane; extracellular region part; nuclear envelope; organelle membrane; cell periphery; intracellular organelle part; organelle envelope; vesicle; cytoplasm; endomembrane system; vesicle membrane; intracellular part; cell; extracellular region; organelle part; plasma membrane; intracellular membrane-bounded organelle; organelle; extracellular exosome; nuclear membrane;…	calcium-dependent phospholipid binding; lipase inhibitor activity; ion binding; phospholipase inhibitor activity; protein binding; molecular function regulator; enzyme inhibitor activity; calcium-dependent protein binding; identical protein binding; enzyme regulator activity; binding; phospholipid binding; lipid binding; cation binding; metal ion binding; anion binding; NF-kappaB binding; calcium…	K17093						U	KOG0819	Annexin
Q00G26	140	S	Perilipin-5	PLIN5	0.331	1.7e-05	Down	Q1	1	0.000412	93.325	WS(1)VELKR	3	0.024144	nucleus	regulation of biological quality; negative regulation of signal transduction; positive regulation of fatty acid oxidation; positive regulation of cellular catabolic process; regulation of signaling; positive regulation of biosynthetic process; regulation of peroxisome proliferator activated receptor signaling pathway; regulation of lipid metabolic process; positive regulation of fatty acid beta-o…	organelle; intracellular membrane-bounded organelle; intracellular organelle; intracellular non-membrane-bounded organelle; cell part; intracellular; cytoplasm; intracellular part; lipid particle; membrane-bounded organelle; cell; cytosol; mitochondrion; cytoplasmic part; non-membrane-bounded organelle;	lipase binding; protein binding; identical protein binding; binding; enzyme binding;	K20255	PLIN5; perilipin-5	hsa03320 PPAR signaling pathway - Homo sapiens (human);
P04792	15	S	Heat shock protein beta-1	HSPB1	0.334	0.000317	Down	Q1	1	0.000808	99.973	GPS(1)WDPFR	3	-1.7845	nucleus	single organism signaling; protein transport along microtubule; blood coagulation; regulation of biological quality; positive regulation of cell migration; regulation of cell death; regulation of tumor necrosis factor production; positive regulation of cytokine biosynthetic process; cell surface receptor signaling pathway; posttranscriptional regulation of gene expression; positive regulation of …	membrane; extracellular space; extracellular region part; cell periphery; cell junction; myofibril; cytoplasmic region; vesicle; cytoplasm; cell projection cytoplasm; macromolecular complex; supramolecular fiber; intracellular part; Z disc; supramolecular complex; cell; I band; organelle part; endopeptidase complex; non-membrane-bounded organelle; cytoskeleton; extracellular exosome; catalytic co…	protein serine/threonine kinase inhibitor activity; RNA binding; protein kinase binding; protein kinase inhibitor activity; protein kinase C inhibitor activity; protein binding; kinase regulator activity; protein kinase regulator activity; enzyme inhibitor activity; molecular function regulator; kinase binding; ubiquitin-like protein binding; protein binding involved in protein folding; heterocyc…	K04455	HSPB1; heat shock protein beta-1	hsa04010 MAPK signaling pathway - Homo sapiens (human); hsa05169 Epstein-Barr virus infection - Homo sapiens (human); hsa04370 VEGF signaling pathway - Homo sapiens (human); hsa05146 Amoebiasis - Homo sapiens (human);	IPR002068; IPR008978;	Alpha crystallin/Hsp20 domain; HSP20-like chaperone;		O	KOG3591	Alpha crystallins
P22626	212	S	Heterogeneous nuclear ribonucleoproteins A2/B1	HNRNPA2B1	0.334	0.000469	Down	Q1	1	0.000407	95.98	GGNFGFGDS(1)R	2	-0.76942	nucleus	RNA transport; regulation of biological quality; positive regulation of telomerase activity; posttranscriptional regulation of gene expression; positive regulation of biosynthetic process; negative regulation of mRNA processing; nuclear transport; regulation of telomere maintenance; cellular metabolic process; protein transport; metabolic process; nucleobase-containing compound transport; positiv…	membrane; extracellular region part; chromosome, telomeric region; vesicle; cytoplasm; macromolecular complex; intracellular part; nuclear body; cell; Cajal body; organelle part; chromosomal part; non-membrane-bounded organelle; extracellular exosome; membrane-enclosed lumen; catalytic complex; nucleoplasm; intracellular organelle lumen; intracellular; cell part; chromosome; extracellular vesicle…	DNA binding; RNA binding; nucleoside phosphate binding; pre-mRNA intronic binding; mRNA 3'-UTR binding; sequence-specific single stranded DNA binding; telomeric DNA binding; single-stranded DNA binding; protein binding; nucleotide binding; sequence-specific DNA binding; single-stranded telomeric DNA binding; N6-methyladenosine-containing RNA binding; heterocyclic compound binding; organic cyclic …	K13158			IPR000504; IPR012677;	RNA recognition motif domain; Nucleotide-binding alpha-beta plait domain;	p23 protein complex; C complex spliceosome;	R	KOG0118	FOG: RRM domain
Q14126	723	S	Desmoglein-2	DSG2	0.335	0.000112	Down	Q1	0.999984	5e-05	102.9	WEEHRS(1)LLSGR	3	-0.41966	plasma membrane	single organism signaling; regulation of biological quality; bundle of His cell to Purkinje myocyte communication; keratinization; reproductive process; cellular developmental process; cell-cell junction organization; single-organism process; heterotypic cell-cell adhesion; regulation of cardiac muscle cell action potential; biological adhesion; bundle of His cell-Purkinje myocyte adhesion involv…	membrane; extracellular region part; apical plasma membrane; cell-cell contact zone; cell junction; cell periphery; vesicle; anchoring junction; intrinsic component of membrane; cell-cell junction; cell; extracellular region; integral component of membrane; intercalated disc; lateral plasma membrane; plasma membrane; desmosome; extracellular exosome; organelle; plasma membrane part; plasma membra…	protein binding involved in heterotypic cell-cell adhesion; cell adhesion molecule binding; protein binding involved in cell adhesion; binding; ion binding; metal ion binding; cation binding; cell adhesive protein binding involved in bundle of His cell-Purkinje myocyte communication; protein binding; calcium ion binding; protein binding involved in cell-cell adhesion;	K07597	DSG2; desmoglein 2	hsa05412 Arrhythmogenic right ventricular cardiomyopathy (ARVC) - Homo sapiens (human);	IPR015919; IPR027397; IPR002126;	Cadherin-like; Catenin binding domain; Cadherin;		S	KOG3594	FOG: Cadherin repeats
Q96CV9	342	S	Optineurin	OPTN	0.335	0.0402	Down	Q1	0.990053	8.72e-06	103.6	KNS(0.99)AIPS(0.01)ELNEK	3	-0.24904	cytoplasm	single organism signaling; defense response to other organism; establishment of protein localization to plasma membrane; regulation of defense response; autophagy; cellular metabolic process; regulation of mitochondrion organization; protein transport; response to biotic stimulus; response to external stimulus; metabolic process; regulation of I-kappaB kinase/NF-kappaB signaling; cell cycle phase…	membrane; organelle membrane; cytoplasmic vesicle; cytoplasm; vesicle; cytoplasmic vesicle part; recycling endosome membrane; intracellular part; cell; organelle part; autophagosome; recycling endosome; membrane-enclosed lumen; nucleoplasm; intracellular organelle lumen; intracellular; cell part; whole membrane; Golgi subcompartment; Golgi apparatus part; perinuclear region of cytoplasm; endosome…	small GTPase binding; polyubiquitin binding; protein binding, bridging; ion binding; protein binding; ubiquitin-like protein binding; Rab GTPase binding; identical protein binding; Ras GTPase binding; binding; K63-linked polyubiquitin binding; metal ion binding; cation binding; ubiquitin binding; protein C-terminus binding; binding, bridging; GTPase binding; enzyme binding;	K19946			IPR021063; IPR032419;	NF-kappa-B essential modulator NEMO, N-terminal; NF-kappa-B essential modulator NEMO, CC2-LZ domain;	HD-RAB8A-OPTN complex;
Q96TA1	696	S	Niban-like protein 1	FAM129B	0.337	0.0201	Down	Q1	0.999942	5.3e-13	120.32	AAPEAS(0.107)S(0.893)PPAS(1)PLQHLLPGK	3	0.25491	cytoplasm	regulation of cellular process; regulation of cell death; regulation of biological process; negative regulation of programmed cell death; negative regulation of apoptotic process; regulation of programmed cell death; negative regulation of cellular process; negative regulation of biological process; negative regulation of cell death; regulation of apoptotic process; biological regulation;	membrane; extracellular region part; cell periphery; cell junction; cytoplasm; vesicle; intracellular part; cell; organelle part; membrane-enclosed lumen; extracellular exosome; nucleoplasm; intracellular organelle lumen; intracellular; cell part; adherens junction; extracellular vesicle; membrane-bounded organelle; organelle lumen; intracellular organelle; intracellular organelle part; anchoring…	cell adhesion molecule binding; protein binding; binding; cadherin binding;				IPR011993; IPR001849;	PH domain-like; Pleckstrin homology domain;
O00763	469	S	Acetyl-CoA carboxylase 2	ACACB	0.338	0.0231	Down	Q1	1	3.25e-11	146.88	KAES(1)AEDFPILFR	3	0.031556	plasma membrane	cellular component biogenesis; regulation of biological quality; cellular lipid metabolic process; regulation of lipid metabolic process; cellular metabolic process; sulfur compound biosynthetic process; positive regulation of growth; lipid biosynthetic process; response to external stimulus; metabolic process; monocarboxylic acid transport; positive regulation of multicellular organismal process…	intracellular organelle; membrane; outer membrane; mitochondrial part; bounding membrane of organelle; organelle membrane; mitochondrial outer membrane; cytoplasm; intracellular organelle part; organelle envelope; endomembrane system; intracellular part; cytosol; cell; organelle part; mitochondrion; organelle; intracellular membrane-bounded organelle; mitochondrial envelope; nucleus; intracellula…	nucleoside phosphate binding; ligase activity, forming carbon-carbon bonds; ligase activity; protein binding; acetyl-CoA carboxylase activity; organic cyclic compound binding; heterocyclic compound binding; carboxylic acid binding; ribonucleotide binding; catalytic activity; binding; purine ribonucleoside binding; cation binding; anion binding; adenyl ribonucleotide binding; adenyl nucleotide bin…	K01946	ACACB; acetyl-CoA carboxylase / biotin carboxylase 2 [EC:6.4.1.2 6.3.4.14]	hsa00061 Fatty acid biosynthesis - Homo sapiens (human); hsa04920 Adipocytokine signaling pathway - Homo sapiens (human); hsa00640 Propanoate metabolism - Homo sapiens (human); hsa00620 Pyruvate metabolism - Homo sapiens (human); hsa01100 Metabolic pathways - Homo sapiens (human); hsa04922 Glucagon signaling pathway - Homo sapiens (human); hsa04910 Insulin signaling pathway - Homo sapiens (human)…	IPR011762; IPR000022; IPR029045; IPR005481; IPR000089; IPR016185; IPR011761; IPR005482; IPR011053; IPR005479; IPR013815; IPR013537; IPR011764; IPR013816; IPR011763; IPR011054;	Acetyl-coenzyme A carboxyltransferase, N-terminal; Carboxyl transferase; ClpP/crotonase-like domain; Biotin carboxylase-like, N-terminal domain; Biotin/lipoyl attachment; Pre-ATP-grasp domain; ATP-grasp fold; Biotin carboxylase, C-terminal; Single hybrid motif; Carbamoyl-phosphate synthetase large subunit-like, ATP-binding domain; ATP-grasp fold, subdomain 1; Acetyl-CoA carboxylase, central domai…		I	KOG0368	Acetyl-CoA carboxylase
P28290	668	S	Sperm-specific antigen 2	SSFA2	0.339	0.0233	Down	Q1	0.997877	0.00249	70.028	S(0.002)LAS(0.998)IEAK	3	0.20748	nucleus		membrane; intracellular organelle; cell periphery; cytoplasm; intracellular part; cytosol; cell; plasma membrane; intracellular membrane-bounded organelle; organelle; nucleus; intracellular; cell part; membrane-bounded organelle; cytoplasmic part;	actin filament binding; cytoskeletal protein binding; receptor binding; binding; macromolecular complex binding; actin binding; protein binding; protein complex binding;				IPR029325; IPR029326;	IP3R-interacting domain; Sperm-specific antigen 2, C-terminal;
Q15149	4054	S	Plectin	PLEC	0.339	0.0343	Down	Q1	0.976471	1.69e-08	145.81	EGLT(0.023)S(0.976)IEEVT(0.001)K	2	0.45515	cytoplasm,nucleus	cellular component biogenesis; cellular component organization; cell junction assembly; cell-substrate junction assembly; cell junction organization; cellular component assembly; hemidesmosome assembly; single-organism cellular process; single-organism process; cellular process; cellular component organization or biogenesis;	membrane; extracellular region part; cluster of actin-based cell projections; brush border; cell periphery; cell junction; myofibril; vesicle; cytoplasm; supramolecular fiber; intracellular part; supramolecular complex; sarcoplasm; cell; organelle part; non-membrane-bounded organelle; cytoskeleton; extracellular exosome; focal adhesion; cell part; intracellular; contractile fiber; adherens juncti…	organic cyclic compound binding; heterocyclic compound binding; cell adhesion molecule binding; RNA binding; cytoskeletal protein binding; binding; cadherin binding; nucleic acid binding; actin binding; protein binding; structural constituent of muscle; ankyrin binding; structural molecule activity;	K10388			IPR001715; IPR005326;	Calponin homology domain; Plectin/S10, N-terminal;		J	KOG3344	40s ribosomal protein s10
Q9C0C2	882	S	182 kDa tankyrase-1-binding protein	TNKS1BP1	0.34	0.0347	Down	Q1	1	3.52e-05	112.42	DVS(1)LGDWEFGK	3	0.156	nucleus	single organism signaling; negative regulation of cell cycle G1/S phase transition; regulation of biological quality; positive regulation of cellular protein metabolic process; regulation of cell cycle process; cellular metabolic process; signal transduction involved in mitotic G1 DNA damage checkpoint; signal transduction involved in mitotic DNA integrity checkpoint; metabolic process; regulatio…	cell junction; cytoplasm; macromolecular complex; intracellular part; cell-cell adherens junction; cell; cell-cell junction; organelle part; heterochromatin; chromosomal part; non-membrane-bounded organelle; cytoskeleton; membrane-enclosed lumen; intracellular organelle lumen; nuclear chromosome part; intracellular; cell part; chromosome; nuclear chromatin; adherens junction; CCR4-NOT complex; me…	cell adhesion molecule binding; binding; cadherin binding; macromolecular complex binding; protein binding; protein domain specific binding; ankyrin repeat binding; enzyme binding;				IPR032764;	Tankyrase 1-binding protein, C-terminal;
P52209	129	S	6-phosphogluconate dehydrogenase, decarboxylating	PGD	0.345	0.000621	Down	Q1	0.997876	3.34e-05	90.718	GILFVGS(0.002)GVS(0.998)GGEEGAR	2	0.59907	cytoplasm,nucleus	NADP metabolic process; carbohydrate biosynthetic process; pyridine nucleotide metabolic process; cellular aromatic compound metabolic process; nicotinamide nucleotide metabolic process; pentose-phosphate shunt, oxidative branch; nucleotide metabolic process; single-organism process; biosynthetic process; monosaccharide biosynthetic process; pyridine-containing compound metabolic process; cellula…	intracellular organelle; extracellular region part; cytoplasm; vesicle; intracellular part; cytosol; cell; extracellular region; organelle; extracellular exosome; intracellular membrane-bounded organelle; nucleus; intracellular; cell part; extracellular vesicle; membrane-bounded organelle; extracellular organelle; cytoplasmic part;	oxidoreductase activity, acting on CH-OH group of donors; oxidoreductase activity, acting on the CH-OH group of donors, NAD or NADP as acceptor; phosphogluconate dehydrogenase (decarboxylating) activity; catalytic activity; oxidoreductase activity;	K00033	PGD; 6-phosphogluconate dehydrogenase [EC:1.1.1.44 1.1.1.343]	hsa00480 Glutathione metabolism - Homo sapiens (human); hsa01100 Metabolic pathways - Homo sapiens (human); hsa00030 Pentose phosphate pathway - Homo sapiens (human); hsa01200 Carbon metabolism - Homo sapiens (human);	IPR006115; IPR008927; IPR013328; IPR006114; IPR016040; IPR012284;	6-phosphogluconate dehydrogenase, NADP-binding; 6-phosphogluconate dehydrogenase C-terminal domain-like; 6-phosphogluconate dehydrogenase, domain 2; 6-phosphogluconate dehydrogenase, C-terminal; NAD(P)-binding domain; 6-phosphogluconate dehydrogenase, domain 3;		G	KOG2653	6-phosphogluconate dehydrogenase
Q13439	71	S	Golgin subfamily A member 4	GOLGA4	0.352	0.0261	Down	Q1	0.988032	0.000904	117.8	VPS(0.988)VES(0.012)LFR	2	0.16763	nucleus	endomembrane system organization; regulation of biological quality; positive regulation of neuron differentiation; establishment of protein localization to organelle; cellular developmental process; establishment of protein localization to plasma membrane; neurogenesis; single-organism process; protein transport; positive regulation of growth; establishment of localization; protein targeting; reg…	membrane; intracellular organelle; extracellular region part; bounding membrane of organelle; organelle membrane; intracellular organelle part; cytoplasm; vesicle; Golgi membrane; endomembrane system; intracellular part; cytosol; cell; extracellular region; organelle part; organelle; extracellular exosome; intracellular membrane-bounded organelle; intracellular; cell part; Golgi subcompartment; t…	protein binding; GTPase binding; enzyme binding; binding;	K20283			IPR000237;	GRIP domain;
O60701	476	S	UDP-glucose 6-dehydrogenase	UGDH	0.353	0.022	Down	Q1	1	5.3e-07	131.35	IPYAPS(1)GEIPK	2	0.41012	cytoplasm	nucleotide-sugar biosynthetic process; single-multicellular organism process; organic acid biosynthetic process; UDP-glucuronate metabolic process; cellular aromatic compound metabolic process; glycosaminoglycan biosynthetic process; single-organism process; biosynthetic process; organonitrogen compound biosynthetic process; cellular metabolic process; glycosaminoglycan metabolic process; organic…	intracellular organelle; extracellular region part; cytoplasm; intracellular organelle part; vesicle; nuclear lumen; intracellular part; cytosol; cell; extracellular region; organelle part; membrane-enclosed lumen; organelle; extracellular exosome; intracellular membrane-bounded organelle; nucleus; nucleoplasm; intracellular organelle lumen; intracellular; cell part; extracellular vesicle; membra…	nucleoside phosphate binding; nucleotide binding; cofactor binding; oxidoreductase activity; electron carrier activity; oxidoreductase activity, acting on CH-OH group of donors; heterocyclic compound binding; organic cyclic compound binding; oxidoreductase activity, acting on the CH-OH group of donors, NAD or NADP as acceptor; UDP-glucose 6-dehydrogenase activity; catalytic activity; NAD binding;…	K00012	UGDH; UDPglucose 6-dehydrogenase [EC:1.1.1.22]	hsa00053 Ascorbate and aldarate metabolism - Homo sapiens (human); hsa00040 Pentose and glucuronate interconversions - Homo sapiens (human); hsa01100 Metabolic pathways - Homo sapiens (human); hsa00520 Amino sugar and nucleotide sugar metabolism - Homo sapiens (human);	IPR001732; IPR008927; IPR016040; IPR014027; IPR014026;	UDP-glucose/GDP-mannose dehydrogenase, N-terminal; 6-phosphogluconate dehydrogenase C-terminal domain-like; NAD(P)-binding domain; UDP-glucose/GDP-mannose dehydrogenase, C-terminal; UDP-glucose/GDP-mannose dehydrogenase, dimerisation;		GT	KOG2666	UDP-glucose/GDP-mannose dehydrogenase
P15735	190	T	Phosphorylase b kinase gamma catalytic chain, liver/testis isoform	PHKG2	0.353	0.00199	Down	Q1	0.976388	1.88e-07	107.98	ELCGT(0.976)PGY(0.024)LAPEILK	3	-0.87917	cytoplasm	regulation of generation of precursor metabolites and energy; positive regulation of carbohydrate metabolic process; single organism signaling; regulation of glycogen catabolic process; peptidyl-serine modification; positive regulation of cellular catabolic process; single-organism process; biosynthetic process; cellular metabolic process; cellular polysaccharide metabolic process; phosphate-cont…	catalytic complex; transferase complex, transferring phosphorus-containing groups; cell part; intracellular; cytoplasm; macromolecular complex; intracellular part; transferase complex; serine/threonine protein kinase complex; cytosol; cell; protein kinase complex; cytoplasmic part; phosphorylase kinase complex;	tau-protein kinase activity; nucleoside phosphate binding; phosphotransferase activity, alcohol group as acceptor; protein binding; calmodulin-dependent protein kinase activity; protein kinase activity; organic cyclic compound binding; heterocyclic compound binding; phosphorylase kinase activity; kinase activity; ribonucleotide binding; catalytic activity; binding; purine ribonucleoside binding; …	K00871	PHKG; phosphorylase kinase gamma subunit [EC:2.7.11.19]	hsa04922 Glucagon signaling pathway - Homo sapiens (human); hsa04910 Insulin signaling pathway - Homo sapiens (human); hsa04020 Calcium signaling pathway - Homo sapiens (human);	IPR000719; IPR011009;	Protein kinase domain; Protein kinase-like domain;		G	KOG0599	Phosphorylase kinase gamma subunit
Q5JRA6	1539	S	Melanoma inhibitory activity protein 3	MIA3	0.353	0.0359	Down	Q1	0.999996	0.000621	112.44	KLS(1)QEEYER	3	0.67948	endoplasmic reticulum	cellular component biogenesis; positive regulation of cell migration; cargo loading into vesicle; positive regulation of locomotion; single-organism process; localization within membrane; protein transport; establishment of localization; negative regulation of locomotion; response to wounding; establishment of localization in cell; lipoprotein localization; cellular component assembly; regulation…	intracellular organelle; membrane; nuclear outer membrane-endoplasmic reticulum membrane network; endoplasmic reticulum; bounding membrane of organelle; organelle membrane; intracellular organelle part; cytoplasm; Golgi membrane; intrinsic component of membrane; endomembrane system; intracellular part; cell; integral component of membrane; organelle part; endoplasmic reticulum exit site; intracel…	substrate-specific transporter activity; protein binding; lipoprotein transporter activity; protein transporter activity; binding; transporter activity;				IPR001452; IPR011511;	SH3 domain; Variant SH3 domain;
O75907	18	S	Diacylglycerol O-acyltransferase 1	DGAT1	0.354	0.000327	Down	Q1	0.758832	1.72e-25	142.46	T(0.005)GS(0.015)RPS(0.221)S(0.759)HGGGGPAAAEEEVR	3	0.84352	plasma membrane	cellular component biogenesis; acylglycerol acyl-chain remodeling; regulation of biological quality; leukocyte activation; glycerolipid metabolic process; alcohol metabolic process; fatty-acyl-CoA metabolic process; very-low-density lipoprotein particle assembly; single-organism process; biosynthetic process; cellular lipid metabolic process; cellular metabolic process; triglyceride biosynthetic …	membrane; nuclear outer membrane-endoplasmic reticulum membrane network; endoplasmic reticulum; organelle membrane; cytoplasmic vesicle; cell periphery; vesicle; cytoplasm; cytoplasmic vesicle part; intrinsic component of membrane; intracellular part; cell; organelle part; intracellular; cell part; membrane part; whole membrane; secretory vesicle; secretory granule; membrane-bounded organelle; sp…	transferase activity, transferring acyl groups; retinol O-fatty-acyltransferase activity; catalytic activity; acylglycerol O-acyltransferase activity; binding; 2-acylglycerol O-acyltransferase activity; protein binding; diacylglycerol O-acyltransferase activity; transferase activity, transferring acyl groups other than amino-acyl groups; transferase activity; O-acyltransferase activity;	K11155	DGAT1; diacylglycerol O-acyltransferase 1 [EC:2.3.1.20 2.3.1.75 2.3.1.76]	hsa04975 Fat digestion and absorption - Homo sapiens (human); hsa01100 Metabolic pathways - Homo sapiens (human); hsa00561 Glycerolipid metabolism - Homo sapiens (human); hsa00830 Retinol metabolism - Homo sapiens (human);				I	KOG0380	Sterol O-acyltransferase/Diacylglycerol O-acyltransferase
P09972	36	S	Fructose-bisphosphate aldolase C	ALDOC	0.354	0.00131	Down	Q1	0.997769	0.000324	73.279	GILAADES(0.998)VGS(0.002)MAK	3	2.9622	cytoplasm	nucleoside metabolic process; leukocyte activation; nucleoside diphosphate phosphorylation; pyridine nucleotide metabolic process; glycolytic process; ribonucleoside diphosphate metabolic process; cellular metabolic process; glucose metabolic process; metabolic process; gluconeogenesis; generation of precursor metabolites and energy; monocarboxylic acid metabolic process; ribose phosphate metabol…	secretory granule lumen; tertiary granule lumen; extracellular region part; cytoplasmic vesicle; cytoplasm; vesicle; cytoplasmic vesicle part; intracellular part; cell; ficolin-1-rich granule lumen; organelle part; non-membrane-bounded organelle; cytoskeleton; extracellular exosome; ficolin-1-rich granule; membrane-enclosed lumen; vesicle lumen; intracellular organelle lumen; intracellular; cell …	cytoskeletal protein binding; fructose-bisphosphate aldolase activity; catalytic activity; carbon-carbon lyase activity; binding; lyase activity; protein binding; aldehyde-lyase activity;	K01623	ALDO; fructose-bisphosphate aldolase, class I [EC:4.1.2.13]	hsa00051 Fructose and mannose metabolism - Homo sapiens (human); hsa04066 HIF-1 signaling pathway - Homo sapiens (human); hsa01100 Metabolic pathways - Homo sapiens (human); hsa00030 Pentose phosphate pathway - Homo sapiens (human); hsa00010 Glycolysis / Gluconeogenesis - Homo sapiens (human); hsa01230 Biosynthesis of amino acids - Homo sapiens (human); hsa01200 Carbon metabolism - Homo sapiens (…	IPR013785;	Aldolase-type TIM barrel;		G	KOG1557	Fructose-biphosphate aldolase
Q96PK6	620	S	RNA-binding protein 14	RBM14	0.356	0.00014	Down	Q1	0.965518	0.000628	120.75	LS(0.027)ES(0.966)QLS(0.007)FR	2	-0.25364	nucleus	cellular component biogenesis; single organism signaling; cell surface receptor signaling pathway; nucleic acid-templated transcription; positive regulation of biosynthetic process; negative regulation of organelle assembly; regulation of cell cycle process; cellular metabolic process; metabolic process; transmembrane receptor protein serine/threonine kinase signaling pathway; regulation of centr…	intracellular organelle; intracellular non-membrane-bounded organelle; intracellular organelle part; cytoplasm; macromolecular complex; nuclear lumen; intracellular part; nucleolus; nuclear body; transcription factor complex; cell; organelle part; non-membrane-bounded organelle; organelle; intracellular membrane-bounded organelle; membrane-enclosed lumen; nucleoplasm; nucleus; intracellular organ…	RNA binding; nucleoside phosphate binding; protein binding, bridging; protein binding; nucleotide binding; transcription cofactor activity; heterocyclic compound binding; organic cyclic compound binding; transcription factor activity, RNA polymerase II transcription factor binding; RNA polymerase II transcription cofactor activity; ligand-dependent nuclear receptor transcription coactivator activ…	K13189			IPR000504; IPR012677;	RNA recognition motif domain; Nucleotide-binding alpha-beta plait domain;		AR	KOG0109	RNA-binding protein LARK, contains RRM and retroviral-type Zn-finger domains
O43598	128	S	2'-deoxynucleoside 5'-phosphate N-hydrolase 1	DNPH1	0.358	0.000103	Down	Q1	1	0.00815	76.605	VLS(1)AMIR	2	-1.41	cytoplasm	regulation of cellular process; regulation of growth; cellular aromatic compound metabolic process; organophosphate catabolic process; cellular developmental process; nucleotide metabolic process; single-organism process; cellular metabolic process; phosphate-containing compound metabolic process; positive regulation of growth; organic substance metabolic process; regulation of cell growth; cellu…	intracellular organelle; extracellular region part; cytoplasm; vesicle; intracellular part; cell; extracellular region; organelle; extracellular exosome; intracellular membrane-bounded organelle; nucleus; intracellular; cell part; extracellular vesicle; membrane-bounded organelle; extracellular organelle;	transferase activity, transferring pentosyl groups; hydrolase activity, hydrolyzing N-glycosyl compounds; identical protein binding; catalytic activity; protein homodimerization activity; binding; hydrolase activity, acting on glycosyl bonds; protein dimerization activity; deoxyribonucleoside 5'-monophosphate N-glycosidase activity; transferase activity, transferring glycosyl groups; protein bind…
Q04637	1231	S	Eukaryotic translation initiation factor 4 gamma 1	EIF4G1	0.361	0.00819	Down	Q1	1	4.14e-05	112.42	EAALPPVS(1)PLK	3	0.3094	nucleus	regulation of biological quality; regulation of cell death; peptide metabolic process; positive regulation of cellular protein metabolic process; posttranscriptional regulation of gene expression; regulation of miRNA mediated inhibition of translation; regulation of cell cycle process; cellular metabolic process; regulation of synapse organization; positive regulation of growth; regulation of cel…	intracellular organelle; membrane; cytoplasm; macromolecular complex; intracellular part; cytosol; cell; intracellular membrane-bounded organelle; organelle; nucleus; intracellular; cell part; ribonucleoprotein complex; intracellular ribonucleoprotein complex; protein complex; membrane-bounded organelle; cytoplasmic part; polysome; eukaryotic translation initiation factor 4F complex;	nucleoside phosphate binding; translation initiation factor activity; protein binding; heterocyclic compound binding; organic cyclic compound binding; protein complex scaffold; mRNA binding; ribonucleotide binding; binding; translation initiation factor binding; purine ribonucleoside binding; cadherin binding; eukaryotic initiation factor 4E binding; anion binding; adenyl ribonucleotide binding; …	K03260	EIF4G; translation initiation factor 4G	hsa03013 RNA transport - Homo sapiens (human); hsa05416 Viral myocarditis - Homo sapiens (human);	IPR003307; IPR003891; IPR003890; IPR016024; IPR016021;	W2 domain; Initiation factor eIF-4 gamma, MA3; MIF4G-like, type 3; Armadillo-type fold; MIF4G-like domain;	MNK1-eIF4F complex; PABPC1-HSPA8-HNRPD-EIF4G1 complex;	J	KOG0401	Translation initiation factor 4F, ribosome/mRNA-bridging subunit (eIF-4G)
Q13884	226	T	Beta-1-syntrophin	SNTB1	0.361	0.00637	Down	Q1	0.78898	1.46e-16	130.56	LGGS(0.163)T(0.789)S(0.048)DPPSSQSFSFHR	3	-0.63589	nucleus	muscle system process; muscle contraction; system process; multicellular organismal process;	intracellular organelle; glycoprotein complex; membrane; intracellular non-membrane-bounded organelle; cell periphery; membrane protein complex; cell junction; plasma membrane protein complex; cytoplasm; anchoring junction; macromolecular complex; intracellular part; cell; dystrophin-associated glycoprotein complex; plasma membrane; synapse; non-membrane-bounded organelle; cytoskeleton; organelle…	cytoskeletal protein binding; binding; actin binding; protein binding; protein domain specific binding; PDZ domain binding; calmodulin binding; structural molecule activity;				IPR011993; IPR001478; IPR001849;	PH domain-like; PDZ domain; Pleckstrin homology domain;		W	KOG3551	Syntrophins (type beta)
Q9HBL0	1314	S	Tensin-1	TNS1	0.361	0.0317	Down	Q1	0.999953	6.53e-20	144.82	HLGGSGSVVPGS(1)PCLDR	2	0.63703	nucleus	cellular component biogenesis; cell migration; cell-substrate junction assembly; cellular component organization; cell junction assembly; localization of cell; single-organism cellular process; single-organism process; cell motility; cell junction organization; cellular component assembly; ameboidal-type cell migration; fibroblast migration; movement of cell or subcellular component; locomotion; …	intracellular organelle; intracellular non-membrane-bounded organelle; cell junction; cytoplasm; anchoring junction; intracellular part; cell; non-membrane-bounded organelle; organelle; cytoskeleton; focal adhesion; intracellular; cell part; adherens junction; cell surface; cell-substrate junction; cell-substrate adherens junction;	actin binding; organic cyclic compound binding; heterocyclic compound binding; RNA binding; protein binding; cytoskeletal protein binding; binding; nucleic acid binding;	K18080			IPR013625; IPR029023; IPR033929; IPR003595; IPR006020; IPR029021; IPR000980; IPR011993; IPR014020; IPR000008;	Tensin/EPS8 phosphotyrosine-binding domain; Tensin phosphatase, lipid phosphatase domain; Tensin, phosphotyrosine-binding domain; Protein-tyrosine phosphatase, catalytic; PTB/PI domain; Protein-tyrosine phosphatase-like; SH2 domain; PH domain-like; Tensin phosphatase, C2 domain; C2 domain;		TR	KOG2283	Clathrin coat dissociation kinase GAK/PTEN/Auxilin and related tyrosine phosphatases
Q13464	576	S	Rho-associated protein kinase 1	ROCK1	0.365	0.0176	Down	Q1	0.997539	0.000571	84.297	S(0.002)IS(0.998)QLES(0.001)LNR	2	0.52614	nucleus	single organism signaling; cellular component biogenesis; regulation of cell death; leukocyte activation; cell surface receptor signaling pathway; regulation of neuron apoptotic process; cellular component morphogenesis; establishment of protein localization to plasma membrane; negative regulation of protein binding; cellular metabolic process; biological adhesion; actin cytoskeleton organization…	membrane; secretory granule lumen; microtubule organizing center part; organelle membrane; cytoplasmic vesicle; cell periphery; vesicle; cytoplasm; cytoplasmic vesicle part; intracellular part; bleb; cell; organelle part; non-membrane-bounded organelle; cytoskeleton; membrane-enclosed lumen; microtubule organizing center; vesicle lumen; intracellular organelle lumen; microtubule cytoskeleton; int…	nucleoside phosphate binding; phosphotransferase activity, alcohol group as acceptor; protein binding; protein kinase activity; heterocyclic compound binding; organic cyclic compound binding; kinase activity; ribonucleotide binding; catalytic activity; Ras GTPase binding; binding; purine ribonucleoside binding; cation binding; anion binding; adenyl ribonucleotide binding; adenyl nucleotide bindin…	K04514	ROCK1; Rho-associated protein kinase 1 [EC:2.7.11.1]	hsa04921 Oxytocin signaling pathway - Homo sapiens (human); hsa05132 Salmonella infection - Homo sapiens (human); hsa04530 Tight junction - Homo sapiens (human); hsa05130 Pathogenic Escherichia coli infection - Homo sapiens (human); hsa04022 cGMP-PKG signaling pathway - Homo sapiens (human); hsa04270 Vascular smooth muscle contraction - Homo sapiens (human); hsa04350 TGF-beta signaling pathway - …	IPR002219; IPR015008; IPR000719; IPR011993; IPR001849; IPR011009; IPR000961;	Protein kinase C-like, phorbol ester/diacylglycerol-binding domain; Rho binding domain; Protein kinase domain; PH domain-like; Pleckstrin homology domain; Protein kinase-like domain; AGC-kinase, C-terminal;		T	KOG0612	Rho-associated, coiled-coil containing protein kinase
P78347	210	S	General transcription factor II-I	GTF2I	0.367	0.0142	Down	Q1	0.991387	2.68e-07	115.8	S(0.008)ILS(0.991)PGGSCGPIK	2	0.31953	nucleus	single organism signaling; negative regulation of developmental process; regulation of biological quality; cellular divalent inorganic cation homeostasis; nucleic acid-templated transcription; negative regulation of multicellular organismal process; single-organism process; biosynthetic process; cellular metabolic process; regulation of RNA biosynthetic process; metabolic process; signal transduc…	intracellular organelle; membrane; cell projection; intracellular organelle part; cytoplasm; neuronal cell body; nuclear lumen; intracellular part; cell; organelle part; membrane-enclosed lumen; intracellular membrane-bounded organelle; organelle; nucleoplasm; somatodendritic compartment; nucleus; intracellular organelle lumen; cell part; intracellular; cell body; membrane-bounded organelle; neur…	organic cyclic compound binding; heterocyclic compound binding; RNA polymerase II transcription factor activity, sequence-specific DNA binding; DNA binding; binding; protein kinase binding; nucleic acid binding transcription factor activity; nucleic acid binding; mitogen-activated protein kinase binding; protein binding; kinase binding; enzyme binding; transcription factor activity, sequence-spec…	K03121	TFII-I; transcription initiation factor TFII-I	hsa03022 Basal transcription factors - Homo sapiens (human); hsa05168 Herpes simplex infection - Homo sapiens (human); hsa04022 cGMP-PKG signaling pathway - Homo sapiens (human);			XFIM complex; anti-BHC110 complex; TNF-alpha/Nf-kappa B signaling complex (RPL6, RPL30, RPS13, CHUK, DDX3X, NFKB2, NFKBIB, REL, IKBKG, NFKB1, MAP3K8, RELB, GLG1, NFKBIA, RELA, TNIP2, GTF2I); Anti-HDAC2 complex;	O	KOG3003	Molecular chaperone of the GrpE family
Q01814	1211	S	Plasma membrane calcium-transporting ATPase 2	ATP2B2	0.368	0.0112	Down	Q1	0.999611	1.19e-05	90.084	NNS(1)AIDSGINLTTDTSK	3	0.62175	plasma membrane	regulation of biological quality; gland development; brain development; cellular component morphogenesis; cellular metabolic process; neurological system process; behavior; hair cell differentiation; response to external stimulus; epidermal cell differentiation; metabolic process; embryonic organ morphogenesis; regulation of localization; detection of stimulus; regulation of cellular component si…	membrane; extracellular region part; endoplasmic reticulum; apical plasma membrane; cell junction; cell periphery; vesicle; cytoplasm; neuronal cell body; intrinsic component of membrane; intracellular part; integral component of plasma membrane; cell; extracellular exosome; plasma membrane region; membrane part; intracellular; cell part; extracellular vesicle; membrane-bounded organelle; neuron …	ATPase coupled ion transmembrane transporter activity; nucleoside phosphate binding; primary active transmembrane transporter activity; substrate-specific transporter activity; hydrolase activity, acting on acid anhydrides; hydrolase activity; protein binding; substrate-specific transmembrane transporter activity; ATPase activity; heterocyclic compound binding; organic cyclic compound binding; me…	K05850	ATP2B; Ca2+ transporting ATPase, plasma membrane [EC:3.6.3.8]	hsa04024 cAMP signaling pathway - Homo sapiens (human); hsa04978 Mineral absorption - Homo sapiens (human); hsa04261 Adrenergic signaling in cardiomyocytes - Homo sapiens (human); hsa04972 Pancreatic secretion - Homo sapiens (human); hsa04970 Salivary secretion - Homo sapiens (human); hsa04961 Endocrine and other factor-regulated calcium reabsorption - Homo sapiens (human); hsa04022 cGMP-PKG sign…	IPR023298; IPR004014; IPR022141; IPR008250; IPR023299; IPR023214; IPR006068;	P-type ATPase, transmembrane domain; Cation-transporting P-type ATPase, N-terminal; Plasma membrane calcium transporting P-type ATPase, C-terminal; P-type ATPase, A domain; P-type ATPase, cytoplasmic domain N; HAD-like domain; Cation-transporting P-type ATPase, C-terminal;		P	KOG0204	Calcium transporting ATPase
Q04637	1187	S	Eukaryotic translation initiation factor 4 gamma 1	EIF4G1	0.368	0.00638	Down	Q1	0.99795	0.00201	76.357	S(0.002)FS(0.998)KEVEER	2	-0.20739	nucleus	regulation of biological quality; regulation of cell death; peptide metabolic process; positive regulation of cellular protein metabolic process; posttranscriptional regulation of gene expression; regulation of miRNA mediated inhibition of translation; regulation of cell cycle process; cellular metabolic process; regulation of synapse organization; positive regulation of growth; regulation of cel…	intracellular organelle; membrane; cytoplasm; macromolecular complex; intracellular part; cytosol; cell; intracellular membrane-bounded organelle; organelle; nucleus; intracellular; cell part; ribonucleoprotein complex; intracellular ribonucleoprotein complex; protein complex; membrane-bounded organelle; cytoplasmic part; polysome; eukaryotic translation initiation factor 4F complex;	nucleoside phosphate binding; translation initiation factor activity; protein binding; heterocyclic compound binding; organic cyclic compound binding; protein complex scaffold; mRNA binding; ribonucleotide binding; binding; translation initiation factor binding; purine ribonucleoside binding; cadherin binding; eukaryotic initiation factor 4E binding; anion binding; adenyl ribonucleotide binding; …	K03260	EIF4G; translation initiation factor 4G	hsa03013 RNA transport - Homo sapiens (human); hsa05416 Viral myocarditis - Homo sapiens (human);	IPR003307; IPR003891; IPR003890; IPR016024; IPR016021;	W2 domain; Initiation factor eIF-4 gamma, MA3; MIF4G-like, type 3; Armadillo-type fold; MIF4G-like domain;	MNK1-eIF4F complex; PABPC1-HSPA8-HNRPD-EIF4G1 complex;	J	KOG0401	Translation initiation factor 4F, ribosome/mRNA-bridging subunit (eIF-4G)
P02545	652	S	Prelamin-A/C	LMNA	0.37	0.0046	Down	Q1	0.995562	0.000394	100.07	SYLLGNS(0.004)S(0.996)PR	2	-0.27575	nucleus	single organism signaling; regulation of cell death; regulation of cell aging; negative regulation of release of cytochrome c from mitochondria; positive regulation of biosynthetic process; nuclear transport; regulation of mitochondrion organization; protein transport; negative regulation of cell proliferation; heart development; response to topologically incorrect protein; regulation of localiza…	membrane; extracellular region part; organelle membrane; cytoplasm; supramolecular fiber; intracellular part; supramolecular complex; nuclear body; cell; organelle part; non-membrane-bounded organelle; cytoskeleton; nuclear lamina; membrane-enclosed lumen; nucleoplasm; nuclear membrane; intracellular organelle lumen; nuclear speck; cell part; intracellular; perinuclear region of cytoplasm; membra…	protein binding; identical protein binding; structural molecule activity; binding;	K12641	LMNA; lamin A/C	hsa05414 Dilated cardiomyopathy - Homo sapiens (human); hsa04210 Apoptosis - Homo sapiens (human); hsa05412 Arrhythmogenic right ventricular cardiomyopathy (ARVC) - Homo sapiens (human); hsa05410 Hypertrophic cardiomyopathy (HCM) - Homo sapiens (human);	IPR001322;	Lamin Tail Domain;	CTCF-nucleophosmin-PARP-HIS-KPNA-LMNA-TOP complex; Emerin architectural complex; Emerin complex 24;	DY	KOG0977	Nuclear envelope protein lamin, intermediate filament superfamily
Q08357	316	S	Sodium-dependent phosphate transporter 2	SLC20A2	0.372	0.0279	Down	Q1	0.985176	0.00278	57.792	ALS(0.985)MT(0.015)HGSVK	3	-0.098127	plasma membrane	entry into host; inorganic anion transmembrane transport; sodium ion transmembrane transport; ion transmembrane transport; metal ion transport; entry into cell of other organism involved in symbiotic interaction; viral life cycle; multi-organism cellular process; anion transmembrane transport; establishment of localization; cation transport; viral process; phosphate ion transport; interspecies in…	membrane; extracellular region part; intrinsic component of plasma membrane; cell periphery; vesicle; intrinsic component of membrane; integral component of plasma membrane; cell; extracellular region; integral component of membrane; plasma membrane; organelle; extracellular exosome; plasma membrane part; cell part; membrane part; extracellular vesicle; membrane-bounded organelle; extracellular o…	solute:cation symporter activity; active transmembrane transporter activity; secondary active transmembrane transporter activity; ion transmembrane transporter activity; active ion transmembrane transporter activity; sodium:phosphate symporter activity; symporter activity; substrate-specific transporter activity; monovalent inorganic cation transmembrane transporter activity; virus receptor activ…	K14640						P	KOG2493	Na+/Pi symporter
P05783	18	S	Keratin, type I cytoskeletal 18	KRT18	0.373	0.0495	Down	Q1	0.995076	1.03e-21	181.51	S(0.005)LGS(0.995)VQAPSYGAR	3	0.15044	mitochondria	single organism signaling; regulation of cell death; endomembrane system organization; keratinization; cell surface receptor signaling pathway; cellular developmental process; establishment of protein localization to plasma membrane; single-organism process; multi-organism cellular process; cellular response to cytokine stimulus; protein transport; establishment of localization; biological adhesi…	extracellular region part; microtubule organizing center part; cell junction; cell periphery; vesicle; cytoplasm; supramolecular fiber; intracellular part; cell-cell adherens junction; supramolecular complex; cell-cell junction; cell; organelle part; non-membrane-bounded organelle; extracellular exosome; membrane-enclosed lumen; cytoskeleton; microtubule organizing center; intracellular organelle…	organic cyclic compound binding; heterocyclic compound binding; cadherin binding involved in cell-cell adhesion; cell adhesion molecule binding; RNA binding; protein binding involved in cell adhesion; binding; cadherin binding; nucleic acid binding; scaffold protein binding; protein binding; protein binding involved in cell-cell adhesion; structural molecule activity;	K07604	KRT1; type I keratin, acidic	hsa05150 Staphylococcus aureus infection - Homo sapiens (human); hsa05130 Pathogenic Escherichia coli infection - Homo sapiens (human);				R	KOG0508	Ankyrin repeat protein
P16930	419	S	Fumarylacetoacetase	FAH	0.373	0.000219	Down	Q1	1	0.0203	60.788	VLPALLPS(1)	2	0.44479	cytoplasm	erythrose 4-phosphate/phosphoenolpyruvate family amino acid catabolic process; alpha-amino acid catabolic process; cellular aromatic compound metabolic process; single-organism process; cellular metabolic process; L-phenylalanine catabolic process; organic substance metabolic process; tyrosine catabolic process; metabolic process; cellular amino acid metabolic process; cellular catabolic process;…	extracellular exosome; organelle; extracellular region part; cell part; intracellular; cytoplasm; vesicle; extracellular vesicle; intracellular part; cell; cytosol; membrane-bounded organelle; extracellular region; extracellular organelle; cytoplasmic part;	hydrolase activity, acting on acid carbon-carbon bonds; catalytic activity; binding; ion binding; cation binding; metal ion binding; protein binding; fumarylacetoacetase activity; hydrolase activity; hydrolase activity, acting on acid carbon-carbon bonds, in ketonic substances;	K01555	FAH; fumarylacetoacetase [EC:3.7.1.2]	hsa00350 Tyrosine metabolism - Homo sapiens (human); hsa01100 Metabolic pathways - Homo sapiens (human);	IPR011234; IPR015377;	Fumarylacetoacetase, C-terminal-related; Fumarylacetoacetase, N-terminal;		G	KOG2843	Fumarylacetoacetase
P61978	379	S	Heterogeneous nuclear ribonucleoprotein K	HNRNPK	0.373	0.00194	Down	Q1	0.999987	1.97e-09	109.32	GS(1)YGDLGGPIITTQVTIPK	3	-0.32931	nucleus	regulation of vesicle-mediated transport; single organism signaling; regulation of lipid transport by positive regulation of transcription from RNA polymerase II promoter; regulation of cell death; nucleic acid-templated transcription; positive regulation of biosynthetic process; negative regulation of mRNA processing; positive regulation of low-density lipoprotein particle receptor biosynthetic …	membrane; extracellular region part; cell junction; vesicle; cytoplasm; macromolecular complex; intracellular part; cell; organelle part; chromosomal part; non-membrane-bounded organelle; cytoskeleton; membrane-enclosed lumen; extracellular exosome; catalytic complex; nucleoplasm; focal adhesion; intracellular organelle lumen; nuclear chromosome part; intracellular; cell part; chromosome; nuclear…	RNA binding; DNA binding; RNA polymerase II transcription factor activity, sequence-specific DNA binding; transcriptional activator activity, RNA polymerase II transcription regulatory region sequence-specific binding; transcription regulatory region sequence-specific DNA binding; transcriptional activator activity, RNA polymerase II core promoter proximal region sequence-specific binding; double…	K12886	HNRNPK; heterogeneous nuclear ribonucleoprotein K	hsa03040 Spliceosome - Homo sapiens (human); hsa05206 MicroRNAs in cancer - Homo sapiens (human); hsa05168 Herpes simplex infection - Homo sapiens (human); hsa05203 Viral carcinogenesis - Homo sapiens (human);	IPR004087; IPR004088; IPR012987;	K Homology domain; K Homology domain, type 1; ROK, N-terminal;	Emerin complex 52; Emerin complex 25; C complex spliceosome;	AR	KOG2192	PolyC-binding hnRNP-K protein HRB57A/hnRNP, contains KH domain
P05114	7	S	Non-histone chromosomal protein HMG-14	HMGN1	0.374	0.00169	Down	Q1	0.962021	0.000206	91.812	KVS(0.962)S(0.038)AEGAAK	3	-0.11964	nucleus	post-embryonic animal organ development; nucleotide-excision repair; positive regulation of biosynthetic process; single-organism process; cellular metabolic process; regulation of RNA biosynthetic process; metabolic process; positive regulation of metabolic process; regulation of epithelial cell proliferation; positive regulation of nitrogen compound metabolic process; positive regulation of mol…	intracellular organelle; intracellular non-membrane-bounded organelle; intracellular organelle part; cytoplasm; nuclear lumen; intracellular part; cell; organelle part; chromosomal part; non-membrane-bounded organelle; intracellular membrane-bounded organelle; organelle; membrane-enclosed lumen; nucleus; nucleoplasm; intracellular organelle lumen; chromatin; intracellular; cell part; chromosome; …	organic cyclic compound binding; heterocyclic compound binding; DNA binding; chromatin DNA binding; binding; macromolecular complex binding; nucleic acid binding; nucleosome binding; chromatin binding; nucleosomal DNA binding;	K11299	HMGN1; high-mobility group nucleosome-binding domain-containing protein 1	hsa05168 Herpes simplex infection - Homo sapiens (human);
P52298	13	S	Nuclear cap-binding protein subunit 2	NCBP2	0.374	0.00233	Down	Q1	0.785696	7.55e-06	130.47	S(0.214)DS(0.786)YVELS(0.001)QYR	2	-0.37164	cytoplasm	single organism signaling; RNA transport; cell surface receptor signaling pathway; posttranscriptional regulation of gene expression; nucleic acid-templated transcription; nuclear transport; DNA-templated transcription, elongation; cellular metabolic process; protein transport; metabolic process; regulation of localization; nucleobase-containing compound transport; regulation of mRNA 3'-end proce…	intracellular organelle; intracellular organelle part; cytoplasm; macromolecular complex; nuclear lumen; intracellular part; RNA cap binding complex; cytosol; cell; organelle part; organelle; intracellular membrane-bounded organelle; membrane-enclosed lumen; nucleoplasm; nucleus; intracellular organelle lumen; intracellular; cell part; nuclear cap binding complex; mRNA cap binding complex; membra…	organic cyclic compound binding; heterocyclic compound binding; mRNA binding; RNA binding; RNA cap binding; nucleoside phosphate binding; RNA 7-methylguanosine cap binding; binding; nucleic acid binding; protein binding; nucleotide binding; snRNA binding; small molecule binding;	K12883	NCBP2; nuclear cap-binding protein subunit 2	hsa03040 Spliceosome - Homo sapiens (human); hsa03015 mRNA surveillance pathway - Homo sapiens (human); hsa03013 RNA transport - Homo sapiens (human);	IPR000504; IPR012677; IPR034148;	RNA recognition motif domain; Nucleotide-binding alpha-beta plait domain; NCBP2, RNA recognition motif;	CRM1-RAN-PHAX-CBC complex (cap binding complex); PHAX-CBC complex (cap binding complex); Spliceosome; CBC complex (cap binding complex);	A	KOG0121	Nuclear cap-binding protein complex, subunit CBP20 (RRM superfamily)
Q8TD19	332	S	Serine/threonine-protein kinase Nek9	NEK9	0.377	0.017	Down	Q1	0.956127	3.82e-19	163.13	S(0.042)S(0.956)T(0.001)VTEAPIAVVTSR	2	-0.11126	cytoplasm	phosphorylation; cellular component organization; nucleus organization; endomembrane system organization; mitotic nuclear division; organelle fission; cellular protein metabolic process; single-organism process; cellular metabolic process; mitotic cell cycle process; phosphate-containing compound metabolic process; organic substance metabolic process; nuclear envelope organization; metabolic proc…	organelle; intracellular membrane-bounded organelle; intracellular organelle; nucleus; cell part; intracellular; cytoplasm; intracellular part; membrane-bounded organelle; cell; cytosol; cytoplasmic part;	nucleoside phosphate binding; phosphotransferase activity, alcohol group as acceptor; protein kinase binding; protein binding; protein kinase activity; organic cyclic compound binding; heterocyclic compound binding; kinase activity; catalytic activity; ribonucleotide binding; binding; purine ribonucleoside binding; cation binding; anion binding; adenyl ribonucleotide binding; adenyl nucleotide bi…	K20878			IPR009091; IPR000719; IPR011009;	Regulator of chromosome condensation 1/beta-lactamase-inhibitor protein II; Protein kinase domain; Protein kinase-like domain;	FACT-NEK9 complex;	R	KOG0589	Serine/threonine protein kinase
Q8N573	202	S	Oxidation resistance protein 1	OXR1	0.387	0.0415	Down	Q1	0.821961	1.12e-62	226.67	VVS(0.088)S(0.822)T(0.088)S(0.001)EEEEAFTEK	3	-0.090371	nucleus	regulation of cell death; neuron death; response to hydroperoxide; regulation of neuron apoptotic process; single-organism process; negative regulation of protein modification process; behavior; metabolic process; negative regulation of oxidative stress-induced neuron death; apoptotic process; response to oxidative stress; adult walking behavior; cellular response to oxidative stress; cellular re…	intracellular organelle; intracellular non-membrane-bounded organelle; cytoplasm; intracellular organelle part; nuclear lumen; intracellular part; nucleolus; cell; mitochondrion; organelle part; non-membrane-bounded organelle; organelle; intracellular membrane-bounded organelle; membrane-enclosed lumen; nucleus; intracellular organelle lumen; cell part; intracellular; membrane-bounded organelle; …	protein binding; catalytic activity; binding; oxidoreductase activity;				IPR018392; IPR006571;	LysM domain; TLDc domain;		L	KOG2372	Oxidation resistance protein
Q9UKX7	221	S	Nuclear pore complex protein Nup50	NUP50	0.388	0.000461	Down	Q1	0.980991	5e-10	122.14	VAAET(0.018)QS(0.981)PS(0.001)LFGSTK	3	-0.20212	cytoplasm	RNA transport; nuclear transport; cellular metabolic process; protein transport; multi-organism intracellular transport; metabolic process; multi-organism metabolic process; regulation of localization; nucleobase-containing compound transport; protein localization to organelle; protein metabolic process; macromolecule metabolic process; protein import into nucleus; intracellular transport of viru…	intracellular organelle; membrane; nuclear pore; organelle membrane; nuclear envelope; intracellular organelle part; organelle envelope; nuclear lumen; macromolecular complex; endomembrane system; intracellular part; cell; organelle part; membrane-enclosed lumen; organelle; intracellular membrane-bounded organelle; nucleoplasm; nuclear membrane; nucleus; intracellular organelle lumen; cell part; …	small GTPase binding; Ras GTPase binding; binding; protein binding; Ran GTPase binding; GTPase binding; enzyme binding;	K14295	NUP50; nuclear pore complex protein Nup50	hsa03013 RNA transport - Homo sapiens (human);	IPR000156; IPR011993; IPR015007;	Ran binding domain; PH domain-like; Nuclear pore complex, NUP2/50/61;		U	KOG2724	Nuclear pore complex component NPAP60L/NUP50
P05783	7	S	Keratin, type I cytoskeletal 18	KRT18	0.391	0.00687	Down	Q1	0.997329	0.000363	132.57	S(0.997)T(0.002)FSTNYR	2	-0.28629	mitochondria	single organism signaling; regulation of cell death; endomembrane system organization; keratinization; cell surface receptor signaling pathway; cellular developmental process; establishment of protein localization to plasma membrane; single-organism process; multi-organism cellular process; cellular response to cytokine stimulus; protein transport; establishment of localization; biological adhesi…	extracellular region part; microtubule organizing center part; cell junction; cell periphery; vesicle; cytoplasm; supramolecular fiber; intracellular part; cell-cell adherens junction; supramolecular complex; cell-cell junction; cell; organelle part; non-membrane-bounded organelle; extracellular exosome; membrane-enclosed lumen; cytoskeleton; microtubule organizing center; intracellular organelle…	organic cyclic compound binding; heterocyclic compound binding; cadherin binding involved in cell-cell adhesion; cell adhesion molecule binding; RNA binding; protein binding involved in cell adhesion; binding; cadherin binding; nucleic acid binding; scaffold protein binding; protein binding; protein binding involved in cell-cell adhesion; structural molecule activity;	K07604	KRT1; type I keratin, acidic	hsa05150 Staphylococcus aureus infection - Homo sapiens (human); hsa05130 Pathogenic Escherichia coli infection - Homo sapiens (human);				R	KOG0508	Ankyrin repeat protein
P61313	197	T	60S ribosomal protein L15	RPL15	0.392	0.0402	Down	Q1	1	0.000725	103.69	RNT(1)LQLHR	3	0.4227	nucleus	cellular component biogenesis; ribonucleoprotein complex biogenesis; establishment of protein localization to organelle; peptide metabolic process; biosynthetic process; multi-organism cellular process; cellular metabolic process; protein transport; establishment of localization; protein targeting; protein targeting to membrane; metabolic process; multi-organism metabolic process; establishment o…	membrane; extracellular region part; myofibril; vesicle; cytoplasm; macromolecular complex; supramolecular fiber; intracellular part; supramolecular complex; cell; organelle part; non-membrane-bounded organelle; extracellular exosome; ribosomal subunit; intracellular; cell part; contractile fiber; extracellular vesicle; cytosolic part; membrane-bounded organelle; cytosolic ribosome; intracellular…	organic cyclic compound binding; heterocyclic compound binding; cell adhesion molecule binding; RNA binding; binding; cadherin binding; nucleic acid binding; protein binding; structural molecule activity; structural constituent of ribosome;	K02877	RP-L15e; large subunit ribosomal protein L15e	hsa03010 Ribosome - Homo sapiens (human);	IPR012678; IPR024794;	Ribosomal protein L23/L15e core domain; Ribosomal protein L15e core domain;	Ribosome, cytoplasmic; TRBP containing complex (DICER, RPL7A, EIF6, MOV10 and subunits of the 60S ribosomal particle); Nop56p-associated pre-rRNA complex; 60S ribosomal subunit, cytoplasmic;	J	KOG1678	60s ribosomal protein L15
Q13151	84	S	Heterogeneous nuclear ribonucleoprotein A0	HNRNPA0	0.392	0.00565	Down	Q1	0.999986	3.75e-15	145.17	AVS(1)REDSARPGAHAK	4	-0.028223	nucleus	regulation of biological quality; cellular aromatic compound metabolic process; regulation of macromolecule metabolic process; posttranscriptional regulation of gene expression; RNA stabilization; response to oxygen-containing compound; response to external biotic stimulus; response to stimulus; response to other organism; cellular metabolic process; response to biotic stimulus; regulation of RNA…	intracellular organelle; intracellular organelle part; macromolecular complex; nuclear lumen; intracellular part; cell; organelle part; organelle; intracellular membrane-bounded organelle; membrane-enclosed lumen; nucleoplasm; nucleus; intracellular organelle lumen; cell part; intracellular; ribonucleoprotein complex; intracellular ribonucleoprotein complex; membrane-bounded organelle; organelle …	organic cyclic compound binding; heterocyclic compound binding; RNA binding; AU-rich element binding; nucleoside phosphate binding; binding; protein kinase binding; nucleic acid binding; protein binding; nucleotide binding; kinase binding; enzyme binding; small molecule binding;	K12894			IPR000504; IPR012677;	RNA recognition motif domain; Nucleotide-binding alpha-beta plait domain;		R	KOG0118	FOG: RRM domain
Q8NBJ4	191	S	Golgi membrane protein 1	GOLM1	0.392	0.00179	Down	Q1	1	0.000418	49.134	KGNEAVAS(1)RDLS(1)ENNDQR	3	-2.0801	extracellular	nucleus organization; cellular component organization; regulation of biological process; regulation of primary metabolic process; organelle organization; regulation of metabolic process; regulation of lipid metabolic process; cellular process; biological regulation; cellular component organization or biogenesis;	intracellular organelle; membrane; intrinsic component of plasma membrane; extracellular space; extracellular region part; cell periphery; cytoplasm; vesicle; endomembrane system; intrinsic component of membrane; intracellular part; integral component of plasma membrane; cell; integral component of membrane; extracellular region; plasma membrane; intracellular membrane-bounded organelle; organell…	protein binding; binding;
Q8IYB3	696	S	Serine/arginine repetitive matrix protein 1	SRRM1	0.393	0.00728	Down	Q1	0.964458	2.63e-07	128.06	APQTSS(0.035)S(0.964)PPPVR	3	-0.4144	nucleus	RNA transport; nucleic acid-templated transcription; biosynthetic process; nuclear export; nuclear transport; cellular metabolic process; protein transport; establishment of localization; DNA-templated transcription, termination; mRNA-containing ribonucleoprotein complex export from nucleus; metabolic process; establishment of localization in cell; nucleic acid transport; nucleobase-containing co…	intracellular organelle; cytoplasm; intracellular organelle part; nuclear lumen; macromolecular complex; intracellular part; spliceosomal complex; nuclear body; cytosol; cell; organelle part; membrane-enclosed lumen; organelle; intracellular membrane-bounded organelle; catalytic complex; nucleoplasm; nucleus; intracellular organelle lumen; nuclear speck; cell part; intracellular; nuclear matrix; …	organic cyclic compound binding; heterocyclic compound binding; DNA binding; RNA binding; protein binding; binding; nucleic acid binding;	K13171	SRRM1; serine/arginine repetitive matrix protein 1	hsa03015 mRNA surveillance pathway - Homo sapiens (human); hsa03013 RNA transport - Homo sapiens (human);	IPR002483;	PWI domain;	Exon junction complex (mRNA splicing-dependent); Exon junction complex; Splicing-associated factors complex; SRm160/300 complex; CDC5L complex; SRm160-SRm300 complex; Spliceosome; C complex spliceosome;	AR	KOG2146	Splicing coactivator SRm160/300, subunit SRm160 (contains PWI domain)
P29474	633	S	Nitric oxide synthase, endothelial	NOS3	0.394	0.00143	Down	Q1	0.895943	1.81e-20	144.57	KES(0.896)S(0.098)NT(0.006)DS(0.001)AGALGTLR	2	0.45405	nucleus	single organism signaling; regulation of cell death; positive regulation of lyase activity; tissue migration; reproductive process; ovulation; chordate embryonic development; respiratory tube development; positive regulation of biosynthetic process; cellular metabolic process; response to biotic stimulus; removal of superoxide radicals; angiogenesis; metabolic process; positive regulation of mole…	membrane; organelle membrane; cytoplasmic vesicle; membrane microdomain; cell periphery; vesicle; cytoplasm; cytoplasmic vesicle part; intracellular part; cell; organelle part; non-membrane-bounded organelle; cytoskeleton; plasma membrane region; membrane part; intracellular; cell part; whole membrane; membrane region; Golgi apparatus part; membrane raft; endocytic vesicle; membrane-bounded organ…	amino acid binding; nucleoside phosphate binding; flavin adenine dinucleotide binding; scaffold protein binding; protein binding; tetrahydrobiopterin binding; NADPH-hemoprotein reductase activity; heterocyclic compound binding; organic cyclic compound binding; arginine binding; heme binding; cadmium ion binding; cytoskeletal protein binding; carboxylic acid binding; ribonucleotide binding; actin …	K13242	NOS3; nitric-oxide synthase, endothelial [EC:1.14.13.39]	hsa04921 Oxytocin signaling pathway - Homo sapiens (human); hsa04066 HIF-1 signaling pathway - Homo sapiens (human); hsa04071 Sphingolipid signaling pathway - Homo sapiens (human); hsa01100 Metabolic pathways - Homo sapiens (human); hsa04370 VEGF signaling pathway - Homo sapiens (human); hsa04933 AGE-RAGE signaling pathway in diabetic complications - Homo sapiens (human); hsa04022 cGMP-PKG signal…	IPR017927; IPR029039; IPR008254; IPR004030; IPR001433; IPR017938; IPR023173; IPR003097; IPR001709;	Ferredoxin reductase-type FAD-binding domain; Flavoprotein-like domain; Flavodoxin/nitric oxide synthase; Nitric oxide synthase, N-terminal; Oxidoreductase FAD/NAD(P)-binding; Riboflavin synthase-like beta-barrel; NADPH-cytochrome p450 reductase, FAD-binding, alpha-helical domain-3; FAD-binding, type 1; Flavoprotein pyridine nucleotide cytochrome reductase;	eNOS-HSP90 complex, VEGF induced; eNOS-HSP90-AKT complex, VEGF induced; UTM-SGCE-DAG1-CAV1-NOS3 complex; eNOS-CAV1 complex; NOS3-CAV1-NOSTRIN complex;	C	KOG1158	NADP/FAD dependent oxidoreductase
Q8IWB9	197	T	Testis-expressed sequence 2 protein	TEX2	0.394	0.03	Down	Q1	0.809812	8.95e-05	125.74	S(0.009)LS(0.181)T(0.81)EVEPK	3	-0.083641	plasma membrane	regulation of cellular process; single organism signaling; cellular response to stimulus; membrane lipid metabolic process; single-organism cellular process; nitrogen compound metabolic process; single-organism process; cellular lipid metabolic process; primary metabolic process; signaling; response to stimulus; cellular metabolic process; organic substance metabolic process; signal transduction;…	intracellular organelle; membrane; endoplasmic reticulum; cytoplasm; intrinsic component of membrane; endomembrane system; intracellular part; cell; integral component of membrane; intracellular membrane-bounded organelle; organelle; intracellular; cell part; membrane part; membrane-bounded organelle; cytoplasmic part;	lipid binding; binding;							R	KOG2238	Uncharacterized conserved protein TEX2, contains PH domain
Q7KZI7	456	S	Serine/threonine-protein kinase MARK2	MARK2	0.395	0.00166	Down	Q1	1	0.000208	92.636	VPAS(1)PLPGLER	3	0.85624	nucleus	single organism signaling; positive regulation of cellular protein metabolic process; cell surface receptor signaling pathway; establishment or maintenance of apical/basal cell polarity; autophagy; cellular metabolic process; metabolic process; positive regulation of multicellular organismal process; positive regulation of molecular function; positive regulation of phosphorylation; positive regul…	membrane; cell periphery; microtubule bundle; cytoplasm; supramolecular fiber; intracellular part; supramolecular complex; cell; organelle part; non-membrane-bounded organelle; membrane-enclosed lumen; cytoskeleton; nucleoplasm; intracellular organelle lumen; membrane part; intracellular; cell part; actin filament; membrane-bounded organelle; organelle lumen; intracellular organelle; polymeric cy…	tau-protein kinase activity; nucleoside phosphate binding; phosphotransferase activity, alcohol group as acceptor; protein binding; kinase regulator activity; protein kinase activity; molecular function regulator; organic cyclic compound binding; heterocyclic compound binding; kinase activator activity; kinase activity; ribonucleotide binding; catalytic activity; binding; purine ribonucleoside bi…	K08798			IPR015940; IPR000719; IPR001772; IPR028375; IPR011009;	Ubiquitin-associated domain; Protein kinase domain; Kinase associated domain 1 (KA1); KA1 domain/Ssp2, C-terminal; Protein kinase-like domain;	Kinase maturation complex 1;	R	KOG0586	Serine/threonine protein kinase
Q00G26	277	S	Perilipin-5	PLIN5	0.397	5.72e-06	Down	Q1	1	6.25e-20	170.92	S(1)QAELETLVLSR	3	0.055037	nucleus	regulation of biological quality; negative regulation of signal transduction; positive regulation of fatty acid oxidation; positive regulation of cellular catabolic process; regulation of signaling; positive regulation of biosynthetic process; regulation of peroxisome proliferator activated receptor signaling pathway; regulation of lipid metabolic process; positive regulation of fatty acid beta-o…	organelle; intracellular membrane-bounded organelle; intracellular organelle; intracellular non-membrane-bounded organelle; cell part; intracellular; cytoplasm; intracellular part; lipid particle; membrane-bounded organelle; cell; cytosol; mitochondrion; cytoplasmic part; non-membrane-bounded organelle;	lipase binding; protein binding; identical protein binding; binding; enzyme binding;	K20255	PLIN5; perilipin-5	hsa03320 PPAR signaling pathway - Homo sapiens (human);
P02787	685	S	Serotransferrin	TF	0.4	0.0365	Down	Q1	0.907223	0.00231	51.566	KCS(0.907)T(0.07)S(0.021)S(0.002)LLEACTFR	3	-1.0017	extracellular	regulation of vesicle-mediated transport; regulation of biological quality; single-organism process; multicellular organismal homeostasis; protein transport; iron ion import into cell; establishment of localization; positive regulation of cellular component organization; transition metal ion transport; regulation of localization; metal ion homeostasis; response to inorganic substance; macromolecu…	membrane; extracellular region part; external side of plasma membrane; extrinsic component of membrane; organelle membrane; cytoplasm; cytoplasmic vesicle part; macromolecular complex; cell; organelle part; early endosome; extracellular exosome; plasma membrane region; clathrin-coated vesicle; intracellular; secretory vesicle; membrane region; membrane-bounded organelle; apical part of cell; orga…	iron ion binding; ion transmembrane transporter activity; receptor binding; ion binding; transition metal ion transmembrane transporter activity; substrate-specific transporter activity; protein binding; substrate-specific transmembrane transporter activity; trivalent inorganic cation transmembrane transporter activity; metal ion transmembrane transporter activity; ferric iron transmembrane trans…	K14736	TF; transferrin	hsa04978 Mineral absorption - Homo sapiens (human); hsa04066 HIF-1 signaling pathway - Homo sapiens (human);	IPR001156;	Transferrin-like domain;
Q68CZ2	632	T	Tensin-3	TNS3	0.4	0.00063	Down	Q1	0.990952	0.00338	103.82	VPLT(0.991)PT(0.009)R	2	0.26631	nucleus	regulation of cellular process; developmental process; lung development; single-multicellular organism process; tube development; cell migration; regulation of cell proliferation; localization of cell; system development; respiratory tube development; single-organism cellular process; positive regulation of cellular process; single-organism process; cell motility; positive regulation of biologica…	focal adhesion; cell part; intracellular; cell junction; cytoplasm; adherens junction; anchoring junction; intracellular part; cell-substrate junction; cell; cytosol; cytoplasmic part; cell-substrate adherens junction;	protein binding; binding;	K18080			IPR013625; IPR003595; IPR033929; IPR029023; IPR006020; IPR029021; IPR000980; IPR011993; IPR014020; IPR000008;	Tensin/EPS8 phosphotyrosine-binding domain; Protein-tyrosine phosphatase, catalytic; Tensin, phosphotyrosine-binding domain; Tensin phosphatase, lipid phosphatase domain; PTB/PI domain; Protein-tyrosine phosphatase-like; SH2 domain; PH domain-like; Tensin phosphatase, C2 domain; C2 domain;		TR	KOG2283	Clathrin coat dissociation kinase GAK/PTEN/Auxilin and related tyrosine phosphatases
Q12959	575	S	Disks large homolog 1	DLG1	0.407	0.0393	Down	Q1	0.939999	1.24e-07	102.45	EQMMNSSISS(0.001)GS(0.058)GS(0.94)LR	2	-0.33681	nucleus	single organism signaling; cellular component biogenesis; GDP metabolic process; regulation of leukocyte activation; negative regulation of lymphocyte proliferation; regulation of stress-activated MAPK cascade; renal tubule morphogenesis; reproductive process; chordate embryonic development; cellular metabolic process; branching morphogenesis of an epithelial tube; T cell activation; metabolic pr…	membrane; extracellular region part; membrane microdomain; cytoplasm; macromolecular complex; supramolecular complex; cell; cytoplasmic side of plasma membrane; organelle part; intercalated disc; basement membrane; non-membrane-bounded organelle; extracellular exosome; occluding junction; plasma membrane region; myelin sheath; intracellular; membrane region; postsynaptic density; synaptic membran…	mitogen-activated protein kinase kinase binding; L27 domain binding; receptor binding; phosphatase activity; nucleobase-containing compound kinase activity; passive transmembrane transporter activity; protein kinase binding; ion channel regulator activity; substrate-specific transporter activity; hydrolase activity; protein binding; phosphoprotein phosphatase activity; molecular function regulato…	K12076	DLG1; disks large protein 1	hsa04390 Hippo signaling pathway - Homo sapiens (human); hsa05166 HTLV-I infection - Homo sapiens (human); hsa04660 T cell receptor signaling pathway - Homo sapiens (human); hsa04530 Tight junction - Homo sapiens (human); hsa05203 Viral carcinogenesis - Homo sapiens (human);	IPR011511; IPR008144; IPR027417; IPR008145; IPR001478; IPR015143; IPR001452; IPR019590; IPR004172; IPR019583;	Variant SH3 domain; Guanylate kinase-like domain; P-loop containing nucleoside triphosphate hydrolase; Guanylate kinase/L-type calcium channel beta subunit; PDZ domain; L27-1; SH3 domain; Disks large homologue 1, N-terminal PEST domain; L27 domain; PDZ-associated domain of NMDA receptors;	LIN2-LIN7-SAP97 complex; beta(1)-AR receptosome (ADRB1-SAP97-AKAP79-PRKAR2A); LIN2-SAP97 complex; LIN2-LIN7-SAP97-MINT1 complex;	F	KOG0708	Membrane-associated guanylate kinase MAGUK (contains PDZ, SH3, HOOK and GUK domains)
P15924	2209	S	Desmoplakin	DSP	0.408	0.0101	Down	Q1	0.980568	0.000809	104.43	S(0.019)MS(0.981)FQGIR	2	-0.52951	nucleus	single organism signaling; regulation of biological quality; leukocyte activation; protein localization to adherens junction; keratinization; muscle tissue morphogenesis; cellular metabolic process; biological adhesion; bundle of His cell-Purkinje myocyte adhesion involved in cell communication; cardiac conduction; epidermal cell differentiation; metabolic process; regulation of action potential;…	basolateral plasma membrane; membrane; extracellular region part; organelle membrane; cytoplasmic vesicle; cell-cell contact zone; cell junction; cell periphery; vesicle; cytoplasm; cytoplasmic vesicle part; supramolecular fiber; intracellular part; cell-cell adherens junction; supramolecular complex; cell-cell junction; cell; organelle part; intercalated disc; non-membrane-bounded organelle; cyt…	RNA binding; protein binding, bridging; protein kinase binding; scaffold protein binding; cell adhesive protein binding involved in bundle of His cell-Purkinje myocyte communication; protein binding; kinase binding; protein binding involved in cell-cell adhesion; protein binding involved in heterotypic cell-cell adhesion; heterocyclic compound binding; organic cyclic compound binding; cell adhesi…	K10381	DSP; desmoplakin	hsa05412 Arrhythmogenic right ventricular cardiomyopathy (ARVC) - Homo sapiens (human);				Z	KOG0516	Dystonin, GAS (Growth-arrest-specific protein), and related proteins
Q9HCD5	96	S	Nuclear receptor coactivator 5	NCOA5	0.408	0.00824	Down	Q1	1	0.000469	88.275	DLRDS(1)RDFR	3	-0.054865	nucleus	regulation of biological quality; negative regulation of signal transduction; nucleic acid-templated transcription; regulation of signaling; glucose homeostasis; biosynthetic process; cellular metabolic process; regulation of RNA biosynthetic process; metabolic process; regulation of cell communication; macromolecule metabolic process; regulation of gene expression; heterocycle biosynthetic proce…	intracellular organelle; extracellular space; extracellular region part; intracellular non-membrane-bounded organelle; intracellular part; cell; actin cytoskeleton; extracellular region; non-membrane-bounded organelle; intracellular membrane-bounded organelle; organelle; cytoskeleton; nucleus; intracellular; cell part; membrane-bounded organelle;	organic cyclic compound binding; heterocyclic compound binding; RNA binding; protein binding; chromatin binding; binding; nucleic acid binding;				IPR004154;	Anticodon-binding;		YU	KOG0845	Nuclear pore complex, Nup98 component (sc Nup145/Nup100/Nup116)
Q9UBM7	14	S	7-dehydrocholesterol reductase	DHCR7	0.409	0.00418	Down	Q1	0.999907	6.13e-11	151.38	AKS(1)LDGVTNDR	2	0.83114	plasma membrane	hormone biosynthetic process; regulation of biological quality; brassinosteroid biosynthetic process; blood vessel development; alcohol metabolic process; respiratory tube development; cellular developmental process; single-organism process; biosynthetic process; regulation of lipid metabolic process; lipid biosynthetic process; metabolic process; regulation of steroid biosynthetic process; chole…	membrane; outer membrane; nuclear outer membrane-endoplasmic reticulum membrane network; endoplasmic reticulum; organelle membrane; cytoplasm; intrinsic component of membrane; intracellular part; cell; organelle part; nuclear outer membrane; nuclear membrane; membrane part; intracellular; cell part; whole membrane; intrinsic component of endoplasmic reticulum membrane; organelle outer membrane; m…	nucleoside phosphate binding; oxidoreductase activity, acting on the CH-CH group of donors, NAD or NADP as acceptor; 7-dehydrocholesterol reductase activity; nucleotide binding; cofactor binding; oxidoreductase activity; sterol delta7 reductase activity; oxidoreductase activity, acting on the CH-CH group of donors; heterocyclic compound binding; organic cyclic compound binding; catalytic activity…	K00213	DHCR7; 7-dehydrocholesterol reductase [EC:1.3.1.21]	hsa01100 Metabolic pathways - Homo sapiens (human); hsa00100 Steroid biosynthesis - Homo sapiens (human);				IT	KOG1435	Sterol reductase/lamin B receptor
Q09666	511	S	Neuroblast differentiation-associated protein AHNAK	AHNAK	0.412	0.0197	Down	Q1	0.98582	2.02e-05	91.589	ISMQDVDLS(0.014)LGS(0.986)PK	3	0.26883	nucleus	regulation of cellular process; cellular component biogenesis; cellular component organization; regulation of macromolecule metabolic process; regulation of nucleobase-containing compound metabolic process; protein oligomerization; cellular component assembly; regulation of calcium ion transmembrane transporter activity; regulation of localization; macromolecular complex assembly; regulation of c…	membrane; extracellular region part; organelle membrane; cell periphery; cell-cell contact zone; cell junction; myofibril; cytoplasm; vesicle; supramolecular fiber; intracellular part; supramolecular complex; cell-cell junction; cell; organelle part; non-membrane-bounded organelle; T-tubule; lysosomal membrane; extracellular exosome; cytoskeleton; focal adhesion; membrane part; intracellular; cel…	organic cyclic compound binding; heterocyclic compound binding; cell adhesion molecule binding; RNA binding; binding; cadherin binding; nucleic acid binding; S100 protein binding; protein binding; structural molecule activity; structural molecule activity conferring elasticity;				IPR001478;	PDZ domain;	DNA ligase IV-XRCC4-AHNK complex;
Q9NVD7	16	T	Alpha-parvin	PARVA	0.414	0.0309	Down	Q1	0.903448	4.45e-05	98.942	SPSVPKS(0.097)PT(0.903)PK	4	0.06914	cytoplasm,nucleus	cellular component biogenesis; actin filament-based movement; outflow tract septum morphogenesis; regulation of biological quality; actin-mediated cell contraction; localization of cell; blood vessel development; cellular developmental process; cellular component morphogenesis; cilium assembly; single-organism process; heterotypic cell-cell adhesion; cilium organization; biological adhesion; resp…	intracellular organelle; membrane; intracellular non-membrane-bounded organelle; cell periphery; cell junction; myofibril; cytoplasm; anchoring junction; supramolecular fiber; intracellular part; Z disc; cytosol; supramolecular complex; cell; I band; organelle part; plasma membrane; supramolecular polymer; non-membrane-bounded organelle; cytoskeleton; organelle; focal adhesion; intracellular; cel…	actin binding; cell adhesion molecule binding; protein binding; cytoskeletal protein binding; binding; cadherin binding;	K06275	PARV; parvin	hsa04510 Focal adhesion - Homo sapiens (human);	IPR001715;	Calponin homology domain;		Z	KOG3631	Alpha-parvin and related focal adhesion proteins
O60437	887	S	Periplakin	PPL	0.416	0.0104	Down	Q1	1	1.08e-07	129.65	NRPDS(1)GVEEAWK	3	1.2308	nucleus	developmental process; cellular component organization; single-multicellular organism process; epithelium development; skin development; keratinocyte differentiation; tissue development; keratinization; system development; cornification; cellular developmental process; single-organism cellular process; single-organism process; multicellular organismal process; epidermal cell differentiation; anim…	intracellular organelle; membrane; extracellular region part; intracellular non-membrane-bounded organelle; cell periphery; cell junction; vesicle; cytoplasm; anchoring junction; intracellular part; cell-cell junction; cell; cytosol; extracellular region; mitochondrion; plasma membrane; non-membrane-bounded organelle; desmosome; extracellular exosome; cytoskeleton; intracellular membrane-bounded …	cell adhesion molecule binding; protein binding; structural constituent of cytoskeleton; structural molecule activity; binding; cadherin binding;	K10386						Z	KOG0516	Dystonin, GAS (Growth-arrest-specific protein), and related proteins
Q92614	145	S	Unconventional myosin-XVIIIa	MYO18A	0.416	0.0292	Down	Q1	0.973189	8.42e-50	177.92	S(0.973)RDES(0.016)AS(0.004)ET(0.006)STPSEHSAAPSPQVEVR	3	0.38548	nucleus	regulation of vesicle-mediated transport; regulation of leukocyte activation; regulation of cell death; endomembrane system organization; localization of cell; regulation of macrophage activation; regulation of secretion; single-organism process; cellular metabolic process; establishment of localization; positive regulation of cellular component organization; metabolic process; actin cytoskeleton…	membrane; organelle membrane; cytoplasm; macromolecular complex; intracellular part; cell; organelle part; non-membrane-bounded organelle; cytoskeleton; intracellular; cell part; Golgi subcompartment; Golgi apparatus part; myosin complex; membrane-bounded organelle; actomyosin; intracellular organelle; bounding membrane of organelle; intracellular non-membrane-bounded organelle; cytoskeletal part…	actin filament binding; motor activity; nucleoside phosphate binding; hydrolase activity, acting on acid anhydrides; hydrolase activity; protein binding; ATPase activity; heterocyclic compound binding; organic cyclic compound binding; pyrophosphatase activity; cytoskeletal protein binding; catalytic activity; ribonucleotide binding; binding; purine ribonucleoside binding; ADP binding; anion bindi…	K10362			IPR002928; IPR001478; IPR027417; IPR001609; IPR020587; IPR027401;	Myosin tail; PDZ domain; P-loop containing nucleoside triphosphate hydrolase; Myosin head, motor domain; DNA recombination and repair protein RecA, monomer-monomer interface; Myosin-like IQ motif-containing domain;		Z	KOG0161	Myosin class II heavy chain
P00387	146	S	NADH-cytochrome b5 reductase 3	CYB5R3	0.418	7.85e-05	Down	Q1	0.999984	0.000117	91.812	GPS(1)GLLVYQGK	2	-0.15271	extracellular	leukocyte activation; alcohol metabolic process; single-organism process; biosynthetic process; cellular metabolic process; lipid biosynthetic process; establishment of localization; metabolic process; cellular response to chemical stimulus; myeloid leukocyte activation; single-organism transport; secretion; lipid metabolic process; cellular response to stimulus; leukocyte mediated immunity; oxid…	membrane; extracellular region part; outer membrane; organelle membrane; cytoplasm; cytoplasmic vesicle part; macromolecular complex; azurophil granule lumen; cell; organelle part; non-membrane-bounded organelle; vacuolar lumen; extracellular exosome; intracellular; secretory vesicle; lysosome; membrane-bounded organelle; mitochondrial inner membrane; endoplasmic reticulum membrane; organelle lum…	oxidoreductase activity, acting on NAD(P)H; nucleoside phosphate binding; oxidoreductase activity, acting on NAD(P)H, heme protein as acceptor; flavin adenine dinucleotide binding; nucleoside binding; ion binding; nucleotide binding; cofactor binding; oxidoreductase activity; FAD binding; heterocyclic compound binding; organic cyclic compound binding; ribonucleoside binding; carbohydrate derivati…	K00326	E1.6.2.2; cytochrome-b5 reductase [EC:1.6.2.2]	hsa00520 Amino sugar and nucleotide sugar metabolism - Homo sapiens (human);	IPR017927; IPR001433; IPR008333; IPR017938; IPR001709;	Ferredoxin reductase-type FAD-binding domain; Oxidoreductase FAD/NAD(P)-binding; Oxidoreductase, FAD-binding domain; Riboflavin synthase-like beta-barrel; Flavoprotein pyridine nucleotide cytochrome reductase;		HC	KOG0534	NADH-cytochrome b-5 reductase
Q9P265	203	S	Disco-interacting protein 2 homolog B	DIP2B	0.419	0.0488	Down	Q1	0.97974	1.46e-14	149.52	GT(0.001)S(0.019)GS(0.98)LADVFANTR	2	0.083261	plasma membrane	metabolic process;	intracellular organelle; membrane; extracellular region part; cytoplasm; vesicle; intracellular part; cell; extracellular region; organelle; extracellular exosome; intracellular membrane-bounded organelle; nucleus; intracellular; cell part; extracellular vesicle; membrane-bounded organelle; extracellular organelle;	catalytic activity;				IPR010506; IPR000873;	DMAP1-binding domain; AMP-dependent synthetase/ligase;		R	KOG3628	Predicted AMP-binding protein
Q9UQB8	336	S	Brain-specific angiogenesis inhibitor 1-associated protein 2	BAIAP2	0.419	9.84e-05	Down	Q1	0.777151	0.000117	93.424	LS(0.2)DS(0.777)YS(0.02)NT(0.004)LPVR	2	0.76048	cytoplasm	cellular component biogenesis; single organism signaling; regulation of biological quality; cell surface receptor signaling pathway; brain development; cellular component morphogenesis; regulation of actin filament length; response to biotic stimulus; biological adhesion; response to external stimulus; actin cytoskeleton organization; positive regulation of multicellular organismal process; regul…	dendrite; membrane; extracellular region part; excitatory synapse; cytoplasm; neuronal cell body; cell-cell adherens junction; actin-based cell projection; cell; supramolecular complex; dendritic spine; organelle part; non-membrane-bounded organelle; extracellular exosome; plasma membrane region; intracellular; secretory vesicle; postsynaptic density; filopodium; synaptic membrane; neuron project…	protein binding, bridging; scaffold protein binding; protein binding; protein binding involved in cell-cell adhesion; PDZ domain binding; proline-rich region binding; cell adhesion molecule binding; cadherin binding involved in cell-cell adhesion; cytoskeletal protein binding; identical protein binding; protein binding involved in cell adhesion; cytoskeletal adaptor activity; binding; cadherin bi…	K05627	BAIAP2; BAI1-associated protein 2	hsa04520 Adherens junction - Homo sapiens (human); hsa04810 Regulation of actin cytoskeleton - Homo sapiens (human);	IPR001452; IPR013606;	SH3 domain; IMD/I-BAR domain;		OKIT	KOG2642	Alpha-1,2 glucosyltransferase/transcriptional activator
P29966	101	S	Myristoylated alanine-rich C-kinase substrate	MARCKS	0.42	0.00922	Down	Q1	1	2.66e-17	138.46	GEPAAAAAPEAGAS(1)PVEK	2	0.9474	nucleus	regulation of cellular process; regulation of peptide transport; regulation of biological quality; regulation of transport; regulation of insulin secretion; regulation of signaling; regulation of secretion; regulation of secretion by cell; regulation of establishment of protein localization; regulation of peptide secretion; regulation of hormone secretion; regulation of biological process; regula…	membrane; extracellular region part; cell cortex; cell junction; cell periphery; cytoplasm; cytoplasmic region; vesicle; intracellular part; germinal vesicle; cell; organelle part; non-membrane-bounded organelle; extracellular exosome; cytoskeleton; microtubule organizing center; focal adhesion; microtubule cytoskeleton; intracellular; cell part; adherens junction; extracellular vesicle; cell-sub…	actin filament binding; cytoskeletal protein binding; binding; protein kinase binding; macromolecular complex binding; actin binding; protein kinase C binding; protein binding; kinase binding; calmodulin binding; enzyme binding; protein complex binding;	K12561	MARCKS; myristoylated alanine-rich C-kinase substrate	hsa04666 Fc gamma R-mediated phagocytosis - Homo sapiens (human); hsa05206 MicroRNAs in cancer - Homo sapiens (human);
P49006	85	T	MARCKS-related protein	MARCKSL1	0.42	0.004	Down	Q1	1	0.000609	79.875	GEVPPKET(1)PK	3	0.34308	nucleus	regulation of cellular process; regulation of biological process; regulation of cell proliferation; positive regulation of cellular process; positive regulation of biological process; biological regulation; positive regulation of cell proliferation;	membrane; extracellular region part; cell periphery; cytoplasm; vesicle; intracellular part; cell; extracellular region; plasma membrane; organelle; extracellular exosome; intracellular; cell part; extracellular vesicle; membrane-bounded organelle; extracellular organelle;	actin binding; protein binding; cytoskeletal protein binding; calmodulin binding; binding;	K13536	MARCKSL1; MARCKS-related protein	hsa04666 Fc gamma R-mediated phagocytosis - Homo sapiens (human); hsa05140 Leishmaniasis - Homo sapiens (human);
Q92614	140	S	Unconventional myosin-XVIIIa	MYO18A	0.421	0.0156	Down	Q1	0.999265	0.000872	121.73	RFS(0.999)FS(0.001)QR	3	0.22961	nucleus	regulation of vesicle-mediated transport; regulation of leukocyte activation; regulation of cell death; endomembrane system organization; localization of cell; regulation of macrophage activation; regulation of secretion; single-organism process; cellular metabolic process; establishment of localization; positive regulation of cellular component organization; metabolic process; actin cytoskeleton…	membrane; organelle membrane; cytoplasm; macromolecular complex; intracellular part; cell; organelle part; non-membrane-bounded organelle; cytoskeleton; intracellular; cell part; Golgi subcompartment; Golgi apparatus part; myosin complex; membrane-bounded organelle; actomyosin; intracellular organelle; bounding membrane of organelle; intracellular non-membrane-bounded organelle; cytoskeletal part…	actin filament binding; motor activity; nucleoside phosphate binding; hydrolase activity, acting on acid anhydrides; hydrolase activity; protein binding; ATPase activity; heterocyclic compound binding; organic cyclic compound binding; pyrophosphatase activity; cytoskeletal protein binding; catalytic activity; ribonucleotide binding; binding; purine ribonucleoside binding; ADP binding; anion bindi…	K10362			IPR002928; IPR001478; IPR027417; IPR001609; IPR020587; IPR027401;	Myosin tail; PDZ domain; P-loop containing nucleoside triphosphate hydrolase; Myosin head, motor domain; DNA recombination and repair protein RecA, monomer-monomer interface; Myosin-like IQ motif-containing domain;		Z	KOG0161	Myosin class II heavy chain
O75764	115	S	Transcription elongation factor A protein 3	TCEA3	0.422	0.0141	Down	Q1	1	1.88e-20	148.52	GLECSDWKPEAGLS(1)PPR	3	-0.85067	nucleus	regulation of cellular process; cellular aromatic compound metabolic process; nucleic acid-templated transcription; regulation of macromolecule metabolic process; regulation of nucleobase-containing compound metabolic process; biosynthetic process; cellular metabolic process; organic substance metabolic process; regulation of RNA biosynthetic process; metabolic process; heterocycle metabolic proc…	organelle; intracellular membrane-bounded organelle; intracellular organelle; nucleus; cell part; intracellular; intracellular part; membrane-bounded organelle; cell;	organic cyclic compound binding; heterocyclic compound binding; DNA binding; transition metal ion binding; binding; ion binding; nucleic acid binding; cation binding; metal ion binding; zinc ion binding;				IPR003617; IPR017923; IPR001222; IPR003618;	Transcription elongation factor, TFIIS/CRSP70, N-terminal, sub-type; Transcription factor IIS, N-terminal; Zinc finger, TFIIS-type; Transcription elongation factor S-II, central domain;		K	KOG1105	Transcription elongation factor TFIIS/Cofactor of enhancer-binding protein Sp1
Q96S66	438	S	Chloride channel CLIC-like protein 1	CLCC1	0.422	0.0108	Down	Q1	0.996866	0.000223	78.326	FQT(0.003)GNKS(0.997)PEVLR	3	0.16446	plasma membrane	inorganic anion transmembrane transport; anion transport; transport; transmembrane transport; ion transmembrane transport; inorganic ion transmembrane transport; ion transport; chloride transport; localization; anion transmembrane transport; inorganic anion transport; chloride transmembrane transport; establishment of localization;	membrane; intracellular organelle; endoplasmic reticulum; cytoplasm; intrinsic component of membrane; macromolecular complex; endomembrane system; intracellular part; transmembrane transporter complex; cell; integral component of membrane; organelle; intracellular membrane-bounded organelle; nucleus; intracellular; cell part; membrane part; chloride channel complex; ion channel complex; transport…	chloride transmembrane transporter activity; ion transmembrane transporter activity; substrate-specific channel activity; passive transmembrane transporter activity; anion channel activity; substrate-specific transporter activity; ion channel activity; chloride channel activity; channel activity; inorganic anion transmembrane transporter activity; substrate-specific transmembrane transporter acti…
P04406	210	S	Glyceraldehyde-3-phosphate dehydrogenase	GAPDH	0.423	2.34e-05	Down	Q1	0.862303	5.01e-09	112.82	GALQNIIPAS(0.862)T(0.138)GAAK	3	1.5094	cytoplasm	regulation of biological quality; nucleoside metabolic process; nucleoside diphosphate phosphorylation; pyridine nucleotide metabolic process; neuron death; glycolytic process; posttranscriptional regulation of gene expression; ribonucleoside diphosphate metabolic process; cellular response to cytokine stimulus; cellular metabolic process; glucose metabolic process; metabolic process; gluconeogen…	membrane; extracellular region part; organelle membrane; cell periphery; cytoplasm; vesicle; macromolecular complex; intracellular part; cell; GAIT complex; organelle part; non-membrane-bounded organelle; cytoskeleton; extracellular exosome; nuclear membrane; microtubule cytoskeleton; intracellular; cell part; extracellular vesicle; perinuclear region of cytoplasm; lipid particle; membrane-bounde…	transferase activity, transferring nitrogenous groups; nucleoside phosphate binding; oxidoreductase activity, acting on the aldehyde or oxo group of donors; tubulin binding; protein binding; nucleotide binding; cofactor binding; oxidoreductase activity; organic cyclic compound binding; heterocyclic compound binding; glyceraldehyde-3-phosphate dehydrogenase (NAD(P)+) (phosphorylating) activity; ox…	K00134	GAPDH; glyceraldehyde 3-phosphate dehydrogenase [EC:1.2.1.12]	hsa05010 Alzheimer's disease - Homo sapiens (human); hsa04066 HIF-1 signaling pathway - Homo sapiens (human); hsa01100 Metabolic pathways - Homo sapiens (human); hsa00010 Glycolysis / Gluconeogenesis - Homo sapiens (human); hsa01230 Biosynthesis of amino acids - Homo sapiens (human); hsa01200 Carbon metabolism - Homo sapiens (human);	IPR020829; IPR016040; IPR020828;	Glyceraldehyde 3-phosphate dehydrogenase, catalytic domain; NAD(P)-binding domain; Glyceraldehyde 3-phosphate dehydrogenase, NAD(P) binding domain;	GAIT complex; HMGB1-HMGB2-HSC70-ERP60-GAPDH complex; Ecsit complex (ECSIT, MT-CO2, GAPDH, TRAF6, NDUFAF1);	G	KOG0657	Glyceraldehyde 3-phosphate dehydrogenase
P28290	665	S	Sperm-specific antigen 2	SSFA2	0.425	0.0075	Down	Q1	0.996219	2.48e-05	146.11	S(0.996)LAS(0.004)IEAK	2	0.25478	nucleus		membrane; intracellular organelle; cell periphery; cytoplasm; intracellular part; cytosol; cell; plasma membrane; intracellular membrane-bounded organelle; organelle; nucleus; intracellular; cell part; membrane-bounded organelle; cytoplasmic part;	actin filament binding; cytoskeletal protein binding; receptor binding; binding; macromolecular complex binding; actin binding; protein binding; protein complex binding;				IPR029325; IPR029326;	IP3R-interacting domain; Sperm-specific antigen 2, C-terminal;
Q8NC51	330	S	Plasminogen activator inhibitor 1 RNA-binding protein	SERBP1	0.425	0.018	Down	Q1	0.85198	8.93e-25	161.99	S(0.139)KS(0.852)EEAHAEDS(0.009)VMDHHFR	5	-0.05572	nucleus	regulation of cellular process; regulation of gene expression; regulation of cell death; regulation of biological quality; regulation of biological process; regulation of macromolecule metabolic process; posttranscriptional regulation of gene expression; regulation of programmed cell death; regulation of metabolic process; regulation of mRNA stability; regulation of apoptotic process; biological …	intracellular organelle; membrane; extracellular region part; cell periphery; cytoplasm; vesicle; intracellular part; cytosol; cell; extracellular region; plasma membrane; organelle; extracellular exosome; intracellular membrane-bounded organelle; nucleus; intracellular; cell part; extracellular vesicle; perinuclear region of cytoplasm; membrane-bounded organelle; extracellular organelle; cytopla…	organic cyclic compound binding; heterocyclic compound binding; cell adhesion molecule binding; mRNA binding; RNA binding; mRNA 3'-UTR binding; binding; cadherin binding; nucleic acid binding; protein binding;	K13199			IPR006861; IPR032381;	Hyaluronan/mRNA-binding protein; Intracellular hyaluronan-binding protein 4, N-terminal domain;		R	KOG2945	Predicted RNA-binding protein
Q99959	251	S	Plakophilin-2	PKP2	0.426	0.00343	Down	Q1	1	0.000489	100.07	S(1)MGNLLEK	3	-0.509	nucleus	single organism signaling; cellular component biogenesis; regulation of biological quality; keratinization; muscle tissue morphogenesis; establishment of protein localization to plasma membrane; negative regulation of cell proliferation; biological adhesion; bundle of His cell-Purkinje myocyte adhesion involved in cell communication; cardiac conduction; epidermal cell differentiation; regulation …	membrane; cell periphery; cell-cell contact zone; cell junction; intrinsic component of membrane; supramolecular fiber; intracellular part; supramolecular complex; cell; cell-cell junction; organelle part; intercalated disc; non-membrane-bounded organelle; cytoskeleton; membrane-enclosed lumen; nucleoplasm; intracellular organelle lumen; membrane part; intracellular; cell part; adherens junction;…	protein kinase binding; macromolecular complex binding; cell adhesive protein binding involved in bundle of His cell-Purkinje myocyte communication; protein binding; sodium channel regulator activity; kinase binding; alpha-catenin binding; protein binding involved in cell-cell adhesion; molecular function regulator; protein binding involved in heterotypic cell-cell adhesion; protein complex scaff…	K12642	PKP2; plakophilin 2	hsa05412 Arrhythmogenic right ventricular cardiomyopathy (ARVC) - Homo sapiens (human);	IPR011989; IPR016024;	Armadillo-like helical; Armadillo-type fold;		TW	KOG1048	Neural adherens junction protein Plakophilin and related Armadillo repeat proteins
Q92667	151	S	A-kinase anchor protein 1, mitochondrial	AKAP1	0.427	0.0112	Down	Q1	0.75426	5.43e-08	137.75	SIPLECPLS(0.246)S(0.754)PK	3	0.079288	mitochondria	regulation of cellular process; single-multicellular organism process; blood coagulation; regulation of biological quality; regulation of body fluid levels; regulation of intracellular signal transduction; response to stress; regulation of signaling; single-organism process; response to stimulus; multicellular organismal process; hemostasis; response to wounding; regulation of protein kinase A si…	intracellular organelle; membrane; outer membrane; mitochondrial part; bounding membrane of organelle; organelle membrane; mitochondrial outer membrane; cytoplasm; intracellular organelle part; organelle envelope; intrinsic component of membrane; intracellular part; cytosol; cell; integral component of membrane; organelle part; mitochondrion; organelle; intracellular membrane-bounded organelle; m…	organic cyclic compound binding; heterocyclic compound binding; protein kinase A binding; RNA binding; protein kinase A regulatory subunit binding; binding; nucleic acid binding; protein binding;	K16518			IPR004087; IPR004088; IPR002999;	K Homology domain; K Homology domain, type 1; Tudor domain;	AMY-1-S-AKAP84-RII-beta complex;	T	KOG2279	Kinase anchor protein AKAP149, contains KH and Tudor RNA-binding domains
P07355	26	S	Annexin A2	ANXA2	0.429	0.0236	Down	Q1	0.989659	2.69e-06	92.098	LSLEGDHST(0.001)PPS(0.01)AYGS(0.99)VK	3	0.74663	cytoplasm	regulation of vesicle-mediated transport; positive regulation of receptor activity; cellular component biogenesis; regulation of biological quality; leukocyte activation; positive regulation of cellular protein metabolic process; regulation of sterol transport; collagen fibril organization; establishment of protein localization to plasma membrane; regulation of vesicle fusion; protein transport; …	membrane; extracellular region part; extrinsic component of membrane; organelle membrane; PCSK9-AnxA2 complex; cytoplasmic region; cytoplasm; cytoplasmic vesicle part; macromolecular complex; cell-cell adherens junction; azurophil granule lumen; cell; organelle part; early endosome; non-membrane-bounded organelle; basement membrane; vacuolar lumen; lysosomal membrane; extracellular exosome; myeli…	phospholipase inhibitor activity; protein binding; molecular function regulator; enzyme inhibitor activity; calcium-dependent protein binding; Rab GTPase binding; phosphatidylinositol bisphosphate binding; organic cyclic compound binding; heterocyclic compound binding; cadherin binding involved in cell-cell adhesion; cytoskeletal protein binding; Ras GTPase binding; phosphatidylinositol-4,5-bisph…	K17092						U	KOG0819	Annexin
P36507	306	S	Dual specificity mitogen-activated protein kinase kinase 2	MAP2K2	0.429	0.00171	Down	Q1	0.999927	1.13e-05	93.5	PRPPGRPVS(1)GHGMDSR	3	0.82712	mitochondria	regulation of vesicle-mediated transport; single organism signaling; regulation of stress-activated MAPK cascade; positive regulation of cellular protein metabolic process; posttranscriptional regulation of gene expression; positive regulation of biosynthetic process; peptidyl-tyrosine modification; cellular metabolic process; regulation of protein serine/threonine kinase activity; regulation of …	membrane; endoplasmic reticulum; microtubule; organelle membrane; cytoplasmic vesicle; cell periphery; cell junction; vesicle; cytoplasm; microbody part; supramolecular fiber; intracellular part; cell-cell junction; supramolecular complex; cell; cytoplasmic side of plasma membrane; cytoplasmic side of membrane; organelle part; early endosome; peroxisomal membrane; non-membrane-bounded organelle; …	nucleoside phosphate binding; phosphotransferase activity, alcohol group as acceptor; scaffold protein binding; protein tyrosine kinase activity; protein binding; kinase regulator activity; protein kinase activity; molecular function regulator; signal transducer, downstream of receptor, with serine/threonine kinase activity; signal transducer activity; heterocyclic compound binding; organic cycli…	K04369	MAP2K2; mitogen-activated protein kinase kinase 2 [EC:2.7.12.2]	hsa04072 Phospholipase D signaling pathway - Homo sapiens (human); hsa04015 Rap1 signaling pathway - Homo sapiens (human); hsa04650 Natural killer cell mediated cytotoxicity - Homo sapiens (human); hsa05221 Acute myeloid leukemia - Homo sapiens (human); hsa05220 Chronic myeloid leukemia - Homo sapiens (human); hsa04662 B cell receptor signaling pathway - Homo sapiens (human); hsa04014 Ras signali…	IPR000719; IPR011009;	Protein kinase domain; Protein kinase-like domain;	BRAF-MAP2K1-MAP2K2-YWHAE complex; KSR1-BRAF-MEK complex; KSR1-RAF1-MEK complex;	T	KOG0581	Mitogen-activated protein kinase kinase (MAP2K)
P02545	632	S	Prelamin-A/C	LMNA	0.43	0.000473	Down	Q1	0.990139	6.98e-20	144.18	S(0.008)VGGS(0.99)GGGS(0.001)FGDNLVTR	3	0.11139	nucleus	single organism signaling; regulation of cell death; regulation of cell aging; negative regulation of release of cytochrome c from mitochondria; positive regulation of biosynthetic process; nuclear transport; regulation of mitochondrion organization; protein transport; negative regulation of cell proliferation; heart development; response to topologically incorrect protein; regulation of localiza…	membrane; extracellular region part; organelle membrane; cytoplasm; supramolecular fiber; intracellular part; supramolecular complex; nuclear body; cell; organelle part; non-membrane-bounded organelle; cytoskeleton; nuclear lamina; membrane-enclosed lumen; nucleoplasm; nuclear membrane; intracellular organelle lumen; nuclear speck; cell part; intracellular; perinuclear region of cytoplasm; membra…	protein binding; identical protein binding; structural molecule activity; binding;	K12641	LMNA; lamin A/C	hsa05414 Dilated cardiomyopathy - Homo sapiens (human); hsa04210 Apoptosis - Homo sapiens (human); hsa05412 Arrhythmogenic right ventricular cardiomyopathy (ARVC) - Homo sapiens (human); hsa05410 Hypertrophic cardiomyopathy (HCM) - Homo sapiens (human);	IPR001322;	Lamin Tail Domain;	CTCF-nucleophosmin-PARP-HIS-KPNA-LMNA-TOP complex; Emerin architectural complex; Emerin complex 24;	DY	KOG0977	Nuclear envelope protein lamin, intermediate filament superfamily
O43396	9	S	Thioredoxin-like protein 1	TXNL1	0.431	0.0162	Down	Q1	0.999825	2.37e-10	95.646	VGVKPVGS(1)DPDFQPELSGAGSR	3	-0.26775	cytoplasm	regulation of cellular process; cellular response to stress; cellular response to stimulus; regulation of biological quality; response to stress; oxidation-reduction process; response to toxic substance; cell redox homeostasis; single-organism cellular process; cellular homeostasis; single-organism process; response to stimulus; homeostatic process; metabolic process; regulation of biological pro…	intracellular organelle; extracellular region part; proteasome complex; cytoplasm; vesicle; macromolecular complex; intracellular part; cytosol; cell; extracellular region; endopeptidase complex; organelle; extracellular exosome; intracellular membrane-bounded organelle; catalytic complex; nucleus; intracellular; cell part; extracellular vesicle; peptidase complex; protein complex; membrane-bound…	protein disulfide oxidoreductase activity; disulfide oxidoreductase activity; oxidoreductase activity, acting on NAD(P)H; catalytic activity; thioredoxin-disulfide reductase activity; protein-disulfide reductase activity; antioxidant activity; oxidoreductase activity, acting on a sulfur group of donors; oxidoreductase activity, acting on a sulfur group of donors, disulfide as acceptor; oxidoreduc…				IPR012336; IPR013766; IPR008979; IPR010400;	Thioredoxin-like fold; Thioredoxin domain; Galactose-binding domain-like; PITH domain;		O	KOG0908	Thioredoxin-like protein
O15020	2254	S	Spectrin beta chain, non-erythrocytic 2	SPTBN2	0.432	0.00197	Down	Q1	0.999999	0.000681	87.184	RGS(1)LGFYK	3	-0.25488	cytoplasm	single organism signaling; cellular component biogenesis; regulation of biological quality; brain development; cellular component morphogenesis; regulation of actin filament length; cellular metabolic process; behavior; response to external stimulus; metabolic process; regulation of cellular component size; positive regulation of molecular function; macromolecule metabolic process; protein metabo…	membrane; extracellular space; extracellular region part; cell cortex; apical plasma membrane; cell junction; cell periphery; cytoplasm; cytoplasmic region; cortical cytoskeleton; neuronal cell body; cortical actin cytoskeleton; intracellular part; cell; organelle part; non-membrane-bounded organelle; cytoskeleton; plasma membrane region; cell part; membrane part; intracellular; spectrin; neuron …	guanyl-nucleotide exchange factor activity; ion binding; protein binding; molecular function regulator; cell adhesion molecule binding; cytoskeletal protein binding; structural constituent of cytoskeleton; binding; cadherin binding; phospholipid binding; lipid binding; actin binding; anion binding; Ras guanyl-nucleotide exchange factor activity; structural molecule activity;	K06115			IPR001605; IPR011993; IPR001715; IPR001849;	Pleckstrin homology domain, spectrin-type; PH domain-like; Calponin homology domain; Pleckstrin homology domain;		Z	KOG0517	Beta-spectrin
P61026	73	T	Ras-related protein Rab-10	RAB10	0.433	0.0399	Down	Q1	0.999804	0.000225	101.35	FHT(1)ITTSYYR	3	0.26092	cytoplasm	single organism signaling; morphogenesis of a polarized epithelium; leukocyte activation; establishment of protein localization to plasma membrane; cellular component morphogenesis; protein transport; biological adhesion; protein localization to endoplasmic reticulum; response to endogenous stimulus; cell adhesion; protein secretion; protein localization to organelle; protein localization; respon…	membrane; extracellular region part; organelle membrane; cytoplasm; cytoplasmic vesicle part; cell-cell adherens junction; cell; organelle part; extracellular exosome; endoplasmic reticulum subcompartment; focal adhesion; intracellular; secretory vesicle; Golgi subcompartment; cell-substrate junction; membrane-bounded organelle; endoplasmic reticulum membrane; cell-substrate adherens junction; ci…	nucleoside phosphate binding; hydrolase activity, acting on acid anhydrides; hydrolase activity; protein binding; myosin V binding; organic cyclic compound binding; heterocyclic compound binding; cadherin binding involved in cell-cell adhesion; pyrophosphatase activity; GDP binding; cytoskeletal protein binding; catalytic activity; ribonucleotide binding; binding; GTPase activity; purine ribonucl…	K07903	RAB10; Ras-related protein Rab-10	hsa04144 Endocytosis - Homo sapiens (human); hsa04152 AMPK signaling pathway - Homo sapiens (human);	IPR005225; IPR027417;	Small GTP-binding protein domain; P-loop containing nucleoside triphosphate hydrolase;		TU	KOG0078	GTP-binding protein SEC4, small G protein superfamily, and related Ras family GTP-binding proteins
Q6DN90	925	S	IQ motif and SEC7 domain-containing protein 1	IQSEC1	0.434	0.0278	Down	Q1	0.99692	1.7e-09	120.76	SALSS(0.003)S(0.997)LR	2	0.34742	cytoplasm	regulation of cellular process; cellular component organization; regulation of intracellular signal transduction; positive regulation of GTPase activity; regulation of signaling; single-organism cellular process; single-organism process; regulation of Ras protein signal transduction; positive regulation of catalytic activity; single-organism organelle organization; actin cytoskeleton organization…	membrane; intracellular organelle; intracellular non-membrane-bounded organelle; intracellular organelle part; cytoplasm; nuclear lumen; intracellular part; nucleolus; cell; organelle part; non-membrane-bounded organelle; organelle; intracellular membrane-bounded organelle; membrane-enclosed lumen; nucleus; intracellular organelle lumen; intracellular; cell part; membrane-bounded organelle; organ…	lipid binding; protein binding; molecular function regulator; ARF guanyl-nucleotide exchange factor activity; guanyl-nucleotide exchange factor activity; binding;	K12495	IQSEC; IQ motif and SEC7 domain-containing protein	hsa04144 Endocytosis - Homo sapiens (human);	IPR023394; IPR033742; IPR011993; IPR000904; IPR001849;	Sec7 domain, alpha orthogonal bundle; IQ motif and SEC7 domain-containing protein, PH domain; PH domain-like; Sec7 domain; Pleckstrin homology domain;		U	KOG0931	Predicted guanine nucleotide exchange factor, contains Sec7 domain
P29474	1202	S	Nitric oxide synthase, endothelial	NOS3	0.435	0.00319	Down	Q1	0.886569	6.84e-05	61.015	GAVPWAFDPPGS(0.057)DT(0.057)NS(0.887)P	2	-0.67051	nucleus	single organism signaling; regulation of cell death; positive regulation of lyase activity; tissue migration; reproductive process; ovulation; chordate embryonic development; respiratory tube development; positive regulation of biosynthetic process; cellular metabolic process; response to biotic stimulus; removal of superoxide radicals; angiogenesis; metabolic process; positive regulation of mole…	membrane; organelle membrane; cytoplasmic vesicle; membrane microdomain; cell periphery; vesicle; cytoplasm; cytoplasmic vesicle part; intracellular part; cell; organelle part; non-membrane-bounded organelle; cytoskeleton; plasma membrane region; membrane part; intracellular; cell part; whole membrane; membrane region; Golgi apparatus part; membrane raft; endocytic vesicle; membrane-bounded organ…	amino acid binding; nucleoside phosphate binding; flavin adenine dinucleotide binding; scaffold protein binding; protein binding; tetrahydrobiopterin binding; NADPH-hemoprotein reductase activity; heterocyclic compound binding; organic cyclic compound binding; arginine binding; heme binding; cadmium ion binding; cytoskeletal protein binding; carboxylic acid binding; ribonucleotide binding; actin …	K13242	NOS3; nitric-oxide synthase, endothelial [EC:1.14.13.39]	hsa04921 Oxytocin signaling pathway - Homo sapiens (human); hsa04066 HIF-1 signaling pathway - Homo sapiens (human); hsa04071 Sphingolipid signaling pathway - Homo sapiens (human); hsa01100 Metabolic pathways - Homo sapiens (human); hsa04370 VEGF signaling pathway - Homo sapiens (human); hsa04933 AGE-RAGE signaling pathway in diabetic complications - Homo sapiens (human); hsa04022 cGMP-PKG signal…	IPR017927; IPR029039; IPR008254; IPR004030; IPR001433; IPR017938; IPR023173; IPR003097; IPR001709;	Ferredoxin reductase-type FAD-binding domain; Flavoprotein-like domain; Flavodoxin/nitric oxide synthase; Nitric oxide synthase, N-terminal; Oxidoreductase FAD/NAD(P)-binding; Riboflavin synthase-like beta-barrel; NADPH-cytochrome p450 reductase, FAD-binding, alpha-helical domain-3; FAD-binding, type 1; Flavoprotein pyridine nucleotide cytochrome reductase;	eNOS-HSP90 complex, VEGF induced; eNOS-HSP90-AKT complex, VEGF induced; UTM-SGCE-DAG1-CAV1-NOS3 complex; eNOS-CAV1 complex; NOS3-CAV1-NOSTRIN complex;	C	KOG1158	NADP/FAD dependent oxidoreductase
P42677	78	S	40S ribosomal protein S27	RPS27	0.435	0.00115	Down	Q1	0.999999	0.000418	85.821	LTEGCS(1)FRR	3	0.23556	extracellular	cellular component biogenesis; ribonucleoprotein complex biogenesis; establishment of protein localization to organelle; peptide metabolic process; ribonucleoprotein complex assembly; single-organism process; biosynthetic process; multi-organism cellular process; cellular metabolic process; protein transport; establishment of localization; protein targeting; protein targeting to membrane; sister …	small ribosomal subunit; cytoplasm; macromolecular complex; intracellular part; cell; organelle part; non-membrane-bounded organelle; membrane-enclosed lumen; nucleoplasm; intracellular organelle lumen; ribosomal subunit; intracellular; cell part; cytosolic part; membrane-bounded organelle; organelle lumen; cytosolic ribosome; intracellular organelle; ribosome; intracellular non-membrane-bounded …	organic cyclic compound binding; heterocyclic compound binding; DNA binding; RNA binding; transition metal ion binding; binding; ion binding; nucleic acid binding; cation binding; metal ion binding; protein binding; zinc ion binding; structural constituent of ribosome; structural molecule activity;	K02978	RP-S27e; small subunit ribosomal protein S27e	hsa03010 Ribosome - Homo sapiens (human);	IPR011332; IPR023407;	Zinc-binding ribosomal protein; Ribosomal protein S27e, zinc-binding domain;	Ribosome, cytoplasmic; 40S ribosomal subunit, cytoplasmic;	J	KOG1779	40s ribosomal protein S27
Q03001	5476	S	Dystonin	DST	0.436	9.91e-05	Down	Q1	0.868814	0.00822	69.554	QLS(0.869)LLDS(0.131)R	2	0.85694	cytoplasm	cellular component biogenesis; regulation of cellular process; single organism signaling; cell junction assembly; cellular component organization; intracellular transport; localization of cell; cell surface receptor signaling pathway; single-organism process; response to stimulus; retrograde axonal transport; cytoskeleton-dependent intracellular transport; microtubule-based transport; establishme…	membrane; extracellular region part; microtubule plus-end; cytoplasmic region; cytoplasm; cell projection cytoplasm; supramolecular complex; cell; I band; organelle part; basement membrane; non-membrane-bounded organelle; extracellular exosome; plasma membrane region; focal adhesion; intracellular; neuron projection; cell-substrate junction; membrane-bounded organelle; neuron part; endoplasmic re…	receptor binding; ion binding; protein dimerization activity; macromolecular complex binding; tubulin binding; protein binding; integrin binding; microtubule plus-end binding; cell adhesion molecule binding; cytoskeletal protein binding; identical protein binding; binding; microtubule binding; protein homodimerization activity; actin binding; metal ion binding; cation binding; protein C-terminus …	K10382			IPR003108; IPR011992; IPR002048; IPR001715;	Gas2-related domain; EF-hand domain pair; EF-hand domain; Calponin homology domain;		Z	KOG0516	Dystonin, GAS (Growth-arrest-specific protein), and related proteins
Q8N573	204	S	Oxidation resistance protein 1	OXR1	0.441	0.00235	Down	Q1	0.978942	8.59e-32	187	VVSST(0.021)S(0.979)EEEEAFTEK	2	0.07907	nucleus	regulation of cell death; neuron death; response to hydroperoxide; regulation of neuron apoptotic process; single-organism process; negative regulation of protein modification process; behavior; metabolic process; negative regulation of oxidative stress-induced neuron death; apoptotic process; response to oxidative stress; adult walking behavior; cellular response to oxidative stress; cellular re…	intracellular organelle; intracellular non-membrane-bounded organelle; cytoplasm; intracellular organelle part; nuclear lumen; intracellular part; nucleolus; cell; mitochondrion; organelle part; non-membrane-bounded organelle; organelle; intracellular membrane-bounded organelle; membrane-enclosed lumen; nucleus; intracellular organelle lumen; cell part; intracellular; membrane-bounded organelle; …	protein binding; catalytic activity; binding; oxidoreductase activity;				IPR018392; IPR006571;	LysM domain; TLDc domain;		L	KOG2372	Oxidation resistance protein
Q8NC51	338	S	Plasminogen activator inhibitor 1 RNA-binding protein	SERBP1	0.442	0.0351	Down	Q1	0.957462	1.49e-08	107.63	S(0.01)KS(0.033)EEAHAEDS(0.957)VMDHHFR	3	-0.68084	nucleus	regulation of cellular process; regulation of gene expression; regulation of cell death; regulation of biological quality; regulation of biological process; regulation of macromolecule metabolic process; posttranscriptional regulation of gene expression; regulation of programmed cell death; regulation of metabolic process; regulation of mRNA stability; regulation of apoptotic process; biological …	intracellular organelle; membrane; extracellular region part; cell periphery; cytoplasm; vesicle; intracellular part; cytosol; cell; extracellular region; plasma membrane; organelle; extracellular exosome; intracellular membrane-bounded organelle; nucleus; intracellular; cell part; extracellular vesicle; perinuclear region of cytoplasm; membrane-bounded organelle; extracellular organelle; cytopla…	organic cyclic compound binding; heterocyclic compound binding; cell adhesion molecule binding; mRNA binding; RNA binding; mRNA 3'-UTR binding; binding; cadherin binding; nucleic acid binding; protein binding;	K13199			IPR006861; IPR032381;	Hyaluronan/mRNA-binding protein; Intracellular hyaluronan-binding protein 4, N-terminal domain;		R	KOG2945	Predicted RNA-binding protein
Q9C0C2	920	S	182 kDa tankyrase-1-binding protein	TNKS1BP1	0.444	0.00741	Down	Q1	0.892128	6.35e-41	202.03	YS(0.108)S(0.892)QDADEQDWEFQK	3	0.36169	nucleus	single organism signaling; negative regulation of cell cycle G1/S phase transition; regulation of biological quality; positive regulation of cellular protein metabolic process; regulation of cell cycle process; cellular metabolic process; signal transduction involved in mitotic G1 DNA damage checkpoint; signal transduction involved in mitotic DNA integrity checkpoint; metabolic process; regulatio…	cell junction; cytoplasm; macromolecular complex; intracellular part; cell-cell adherens junction; cell; cell-cell junction; organelle part; heterochromatin; chromosomal part; non-membrane-bounded organelle; cytoskeleton; membrane-enclosed lumen; intracellular organelle lumen; nuclear chromosome part; intracellular; cell part; chromosome; nuclear chromatin; adherens junction; CCR4-NOT complex; me…	cell adhesion molecule binding; binding; cadherin binding; macromolecular complex binding; protein binding; protein domain specific binding; ankyrin repeat binding; enzyme binding;				IPR032764;	Tankyrase 1-binding protein, C-terminal;
O60504	544	S	Vinexin	SORBS3	0.446	0.00722	Down	Q1	0.996754	0.000357	101.48	HPS(0.997)S(0.969)PS(0.034)ALR	3	-0.20825	nucleus	muscle system process; positive regulation of cellular protein metabolic process; regulation of signaling; positive regulation of intracellular signal transduction; single-organism process; negative regulation of RNA metabolic process; positive regulation of cellular component organization; biological adhesion; regulation of RNA biosynthetic process; actin cytoskeleton organization; regulation of…	intracellular organelle; intracellular non-membrane-bounded organelle; cell junction; cytoplasm; anchoring junction; intracellular part; cell; cytosol; non-membrane-bounded organelle; organelle; cytoskeleton; intracellular membrane-bounded organelle; nucleus; focal adhesion; intracellular; cell part; adherens junction; cell-substrate junction; membrane-bounded organelle; cell-substrate adherens j…	cytoskeletal protein binding; structural constituent of cytoskeleton; vinculin binding; binding; protein binding; structural molecule activity; transcription factor binding;				IPR001452; IPR003127;	SH3 domain; SoHo domain;		T	KOG4225	Sorbin and SH3 domain-containing protein
Q14160	1378	S	Protein scribble homolog	SCRIB	0.446	0.0359	Down	Q1	1	2.15e-06	133.96	RVS(1)LVGADDLR	3	0.30393	nucleus	single organism signaling; GDP metabolic process; regulation of cell death; gland development; tube formation; chordate embryonic development; cellular metabolic process; hair cell differentiation; epidermal cell differentiation; vesicle-mediated transport in synapse; metabolic process; guanosine-containing compound metabolic process; positive regulation of molecular function; epidermis developme…	basolateral plasma membrane; membrane; extracellular region part; cell-cell contact zone; cell junction; cell periphery; vesicle; cytoplasm; macromolecular complex; myelin sheath abaxonal region; intracellular part; cell-cell adherens junction; cell-cell junction; cell; asymmetric synapse; organelle part; membrane-enclosed lumen; extracellular exosome; nucleoplasm; intracellular organelle lumen; …	glutamate receptor binding; cell adhesion molecule binding; kinase activity; catalytic activity; receptor binding; guanylate kinase activity; binding; nucleobase-containing compound kinase activity; cadherin binding; protein binding; ionotropic glutamate receptor binding; phosphotransferase activity, phosphate group as acceptor; transferase activity; nucleotide kinase activity; transferase activi…	K16175	SCRIB; protein scribble	hsa04390 Hippo signaling pathway - Homo sapiens (human); hsa04530 Tight junction - Homo sapiens (human); hsa05203 Viral carcinogenesis - Homo sapiens (human);	IPR001478; IPR032675;	PDZ domain; Leucine-rich repeat domain, L domain-like;	Scrib-beta-PIX-GIT1 complex; SCRIB-APC complex; SCRIB-LGL2 complex; SCRIB-VANGL2 complex;	R	KOG0619	FOG: Leucine rich repeat
O95292	159	S	Vesicle-associated membrane protein-associated protein B/C	VAPB	0.447	0.000184	Down	Q1	0.829285	5.8e-27	194.98	S(0.005)LS(0.064)S(0.829)S(0.101)LDDTEVK	3	0.20171	cytoplasm	single organism signaling; regulation of biological quality; positive regulation of cellular protein metabolic process; modulation by host of viral genome replication; cellular lipid metabolic process; cellular metabolic process; lipid biosynthetic process; metabolic process; response to topologically incorrect protein; sphingolipid biosynthetic process; positive regulation of molecular function;…	intracellular organelle; membrane; nuclear outer membrane-endoplasmic reticulum membrane network; endoplasmic reticulum; bounding membrane of organelle; organelle membrane; intracellular organelle part; cytoplasm; Golgi membrane; intrinsic component of membrane; endomembrane system; intracellular part; cell; integral component of membrane; organelle part; intracellular membrane-bounded organelle;…	cell adhesion molecule binding; identical protein binding; cytoskeletal protein binding; protein heterodimerization activity; protein homodimerization activity; microtubule binding; binding; FFAT motif binding; protein dimerization activity; cadherin binding; tubulin binding; protein domain specific binding; protein binding; beta-tubulin binding; enzyme binding;	K10707			IPR008962; IPR000535;	PapD-like; Major sperm protein (MSP) domain;		U	KOG0439	VAMP-associated protein involved in inositol metabolism
P49585	342	T	Choline-phosphate cytidylyltransferase A	PCYT1A	0.447	0.0225	Down	Q1	0.842627	2.74e-11	154.13	T(0.843)S(0.157)PPCSPANLSR	2	0.0040803	nucleus	phosphatidylcholine metabolic process; glycerolipid metabolic process; phospholipid biosynthetic process; ammonium ion metabolic process; single-organism process; biosynthetic process; cellular lipid metabolic process; organonitrogen compound biosynthetic process; cellular metabolic process; phosphate-containing compound metabolic process; lipid biosynthetic process; organic substance metabolic p…	intracellular organelle; membrane; nuclear outer membrane-endoplasmic reticulum membrane network; endoplasmic reticulum; nuclear envelope; cell periphery; organelle envelope; intracellular organelle part; cytoplasm; endomembrane system; intracellular part; cytosol; cell; organelle part; plasma membrane; intracellular membrane-bounded organelle; organelle; nucleus; endoplasmic reticulum part; glyc…	ammonium ion binding; protein dimerization activity; ion binding; protein binding; choline-phosphate cytidylyltransferase activity; calmodulin binding; phosphatidylcholine binding; cytidylyltransferase activity; quaternary ammonium group binding; identical protein binding; nucleotidyltransferase activity; catalytic activity; protein homodimerization activity; binding; phospholipid binding; lipid …	K00968	PCYT1; choline-phosphate cytidylyltransferase [EC:2.7.7.15]	hsa05231 Choline metabolism in cancer - Homo sapiens (human); hsa00440 Phosphonate and phosphinate metabolism - Homo sapiens (human); hsa00564 Glycerophospholipid metabolism - Homo sapiens (human); hsa01100 Metabolic pathways - Homo sapiens (human);	IPR014729; IPR004821;	Rossmann-like alpha/beta/alpha sandwich fold; Cytidyltransferase-like domain;		I	KOG2804	Phosphorylcholine transferase/cholinephosphate cytidylyltransferase
Q9NX40	122	S	OCIA domain-containing protein 1	OCIAD1	0.447	0.000556	Down	Q1	0.862673	2.37e-06	132.62	RS(0.863)S(0.137)PPGHYYQK	2	2.1522	nucleus		intracellular vesicle; intracellular organelle; membrane; cytoplasmic vesicle; cytoplasm; vesicle; endomembrane system; intracellular part; cell; mitochondrion; organelle; intracellular membrane-bounded organelle; intracellular; cell part; endosome; membrane-bounded organelle; cytoplasmic part;	protein binding; binding;				IPR009764;	Ovarian carcinoma immunoreactive antigen;
Q13557	333	S	Calcium/calmodulin-dependent protein kinase type II subunit delta	CAMK2D	0.45	0.000314	Down	Q1	0.925453	1.1e-11	100.66	KPDGVKES(0.795)T(0.215)ES(0.925)S(0.064)NTTIEDEDVK	4	-0.06019	cytoplasm	single organism signaling; cellular component biogenesis; regulation of cell death; regulation of biological quality; cell surface receptor signaling pathway; positive regulation of muscle hypertrophy; regulation of relaxation of cardiac muscle; negative regulation of sodium ion transport; negative regulation of sodium ion transmembrane transport; cellular response to cytokine stimulus; cellular …	membrane; endoplasmic reticulum; nuclear outer membrane-endoplasmic reticulum membrane network; cytoplasmic vesicle; organelle membrane; cell periphery; vesicle; cytoplasm; cytoplasmic vesicle part; intracellular part; sarcoplasm; cell; organelle part; sarcoplasmic reticulum membrane; membrane-enclosed lumen; nucleoplasm; intracellular organelle lumen; membrane part; intracellular; cell part; who…	ion channel inhibitor activity; nucleoside phosphate binding; phosphotransferase activity, alcohol group as acceptor; guanyl-nucleotide exchange factor activity; protein dimerization activity; ion channel regulator activity; protein binding; sodium channel regulator activity; calmodulin-dependent protein kinase activity; protein kinase activity; molecular function regulator; channel inhibitor act…	K04515	CAMK2; calcium/calmodulin-dependent protein kinase (CaM kinase) II [EC:2.7.11.17]	hsa04921 Oxytocin signaling pathway - Homo sapiens (human); hsa05152 Tuberculosis - Homo sapiens (human); hsa04728 Dopaminergic synapse - Homo sapiens (human); hsa04722 Neurotrophin signaling pathway - Homo sapiens (human); hsa05031 Amphetamine addiction - Homo sapiens (human); hsa04916 Melanogenesis - Homo sapiens (human); hsa04020 Calcium signaling pathway - Homo sapiens (human); hsa04024 cAMP …	IPR000719; IPR013543; IPR011009; IPR032710;	Protein kinase domain; Calcium/calmodulin-dependent protein kinase II, association-domain; Protein kinase-like domain; NTF2-like domain;	CAMK2-delta-MASH1 promoter-coactivator complex;	T	KOG0033	Ca2+/calmodulin-dependent protein kinase, EF-Hand protein superfamily
P98095	578	S	Fibulin-2	FBLN2	0.451	0.0147	Down	Q1	1	1.24e-08	151.99	RVS(1)EAEMAGR	3	-0.741	extracellular	regulation of biological process; regulation of cell-substrate adhesion; positive regulation of cell adhesion; positive regulation of biological process; positive regulation of cell-substrate adhesion; regulation of cell adhesion; biological regulation;	extracellular matrix; extracellular exosome; organelle; extracellular space; extracellular region part; vesicle; extracellular vesicle; proteinaceous extracellular matrix; membrane-bounded organelle; extracellular region; extracellular organelle;	extracellular matrix structural constituent; binding; ion binding; metal ion binding; cation binding; protein binding; calcium ion binding; structural molecule activity; extracellular matrix binding;	K17307			IPR026823; IPR001881; IPR000742; IPR009030; IPR000020;	Complement Clr-like EGF domain; EGF-like calcium-binding domain; EGF-like domain; Growth factor receptor cysteine-rich domain; Anaphylatoxin/fibulin;		T	KOG1217	Fibrillins and related proteins containing Ca2+-binding EGF-like domains
O60716	252	S	Catenin delta-1	CTNND1	0.452	0.0409	Down	Q1	1	1.25e-40	199.01	APS(1)RQDVYGPQPQVR	2	-0.10307	nucleus	single organism signaling; entry into host; negative regulation of signal transduction; cell surface receptor signaling pathway; nucleic acid-templated transcription; brain development; regulation of signaling; cell-cell junction organization; negative regulation of canonical Wnt signaling pathway; single-organism process; biosynthetic process; cellular metabolic process; biological adhesion; reg…	dendrite; membrane; extracellular region part; cell periphery; cell junction; vesicle; cytoplasm; growth cone; intracellular part; cell-cell adherens junction; cell-cell junction; cell; dendritic spine; extracellular exosome; neuron spine; intracellular; cell part; lamellipodium; adherens junction; extracellular vesicle; neuron projection; membrane-bounded organelle; neuron part; synapse part; ce…	cell adhesion molecule binding; receptor binding; binding; cadherin binding; protein kinase binding; protein binding; kinase binding; enzyme binding;	K05690	CTNND1; catenin (cadherin-associated protein), delta 1	hsa04670 Leukocyte transendothelial migration - Homo sapiens (human); hsa04015 Rap1 signaling pathway - Homo sapiens (human); hsa04520 Adherens junction - Homo sapiens (human);	IPR011989; IPR016024;	Armadillo-like helical; Armadillo-type fold;		TW	KOG1048	Neural adherens junction protein Plakophilin and related Armadillo repeat proteins
Q06830	32	S	Peroxiredoxin-1	PRDX1	0.452	6.9e-07	Down	Q1	0.929724	0.000805	99.283	DIS(0.07)LS(0.93)DYK	2	-0.27254	cytoplasm	superoxide metabolic process; response to superoxide; regulation of biological quality; regulation of stress-activated MAPK cascade; myeloid cell homeostasis; regulation of protein targeting; regulation of signaling; single-organism process; cellular metabolic process; multicellular organismal homeostasis; removal of superoxide radicals; erythrocyte homeostasis; metabolic process; regulation of p…	intracellular vesicle; intracellular organelle; extracellular space; extracellular region part; cytoplasmic vesicle; melanosome; cytoplasm; vesicle; intracellular part; cytosol; cell; extracellular region; mitochondrion; pigment granule; extracellular matrix; extracellular exosome; intracellular membrane-bounded organelle; organelle; nucleus; myelin sheath; intracellular; cell part; extracellular…	RNA binding; antioxidant activity; protein binding; oxidoreductase activity; heterocyclic compound binding; organic cyclic compound binding; cell adhesion molecule binding; identical protein binding; catalytic activity; binding; thioredoxin peroxidase activity; cadherin binding; nucleic acid binding; peroxiredoxin activity; peroxidase activity; oxidoreductase activity, acting on peroxide as accep…	K13279	PRDX1; peroxiredoxin 1 [EC:1.11.1.15]	hsa04146 Peroxisome - Homo sapiens (human);	IPR019479; IPR000866; IPR012336; IPR013766;	Peroxiredoxin, C-terminal; Alkyl hydroperoxide reductase subunit C/ Thiol specific antioxidant; Thioredoxin-like fold; Thioredoxin domain;	Sulphiredoxin-peroxiredoxin complex;	O	KOG0852	Alkyl hydroperoxide reductase, thiol specific antioxidant and related enzymes
Q8N3F8	309	S	MICAL-like protein 1	MICALL1	0.452	0.00631	Down	Q1	0.935941	6.19e-07	99.413	KAS(0.936)ES(0.059)T(0.004)T(0.001)PAPPTPR	3	-0.38042	nucleus	endomembrane system organization; neuron development; cellular developmental process; single-organism process; neurogenesis; cellular response to growth factor stimulus; protein transport; establishment of localization; protein targeting; protein targeting to membrane; establishment of localization in cell; slow endocytic recycling; response to endogenous stimulus; retrograde transport, endosome …	endosome membrane; intracellular organelle; intracellular vesicle; membrane; late endosome; bounding membrane of organelle; extrinsic component of membrane; cytoplasmic vesicle; organelle membrane; cytoplasm; intracellular organelle part; vesicle; cytoplasmic vesicle part; endosomal part; endomembrane system; recycling endosome membrane; intracellular part; cell; organelle part; recycling endosom…	small GTPase binding; ion binding; protein binding; zinc ion binding; Rab GTPase binding; cell adhesion molecule binding; identical protein binding; phosphatidic acid binding; transition metal ion binding; Ras GTPase binding; binding; cadherin binding; phospholipid binding; lipid binding; cation binding; metal ion binding; anion binding; GTPase binding; enzyme binding;	K19948			IPR001781; IPR022735; IPR001715;	Zinc finger, LIM-type; Domain of unknown function DUF3585; Calponin homology domain;		Z	KOG0035	Ca2+-binding actin-bundling protein (actinin), alpha chain (EF-Hand protein superfamily)
Q9H6S3	368	S	Epidermal growth factor receptor kinase substrate 8-like protein 2	EPS8L2	0.456	0.0256	Down	Q1	0.867069	0.0279	52.863	S(0.103)VS(0.867)CPLLS(0.03)R	2	1.2048	cytoplasm,nucleus	single organism signaling; regulation of cellular process; regulation of cell projection assembly; regulation of signaling; single-organism process; regulation of Ras protein signal transduction; regulation of cell projection organization; regulation of cellular component biogenesis; response to stimulus; positive regulation of cellular component organization; signal transduction; regulation of c…	membrane; cell leading edge; cell projection; extracellular region part; cell periphery; ruffle membrane; cytoplasm; vesicle; macromolecular complex; intracellular part; cytosol; cell; cell projection part; extracellular region; plasma membrane; organelle; extracellular exosome; plasma membrane part; plasma membrane region; leading edge membrane; intracellular; membrane part; cell part; extracell…	actin binding; cell adhesion molecule binding; protein binding; cytoskeletal protein binding; binding; cadherin binding;	K17277			IPR013625; IPR001452; IPR011993; IPR006020; IPR033928;	Tensin/EPS8 phosphotyrosine-binding domain; SH3 domain; PH domain-like; PTB/PI domain; Epidermal growth factor receptor kinase substrate, phosphotyrosine-binding domain;		T	KOG3557	Epidermal growth factor receptor kinase substrate
Q9NX40	123	S	OCIA domain-containing protein 1	OCIAD1	0.456	0.000299	Down	Q1	0.979555	3.68e-08	145.23	RS(0.02)S(0.98)PPGHYYQK	2	0.94363	nucleus		intracellular vesicle; intracellular organelle; membrane; cytoplasmic vesicle; cytoplasm; vesicle; endomembrane system; intracellular part; cell; mitochondrion; organelle; intracellular membrane-bounded organelle; intracellular; cell part; endosome; membrane-bounded organelle; cytoplasmic part;	protein binding; binding;				IPR009764;	Ovarian carcinoma immunoreactive antigen;
P00736	541	S	Complement C1r subcomponent	C1R	0.459	0.0352	Down	Q1	1	0.000274	120.84	RVS(1)VHPDYR	3	0.36765	extracellular	immunoglobulin mediated immune response; immune effector process; humoral immune response; response to stimulus; innate immune response; B cell mediated immunity; organic substance metabolic process; complement activation; metabolic process; adaptive immune response; complement activation, classical pathway; proteolysis; macromolecule metabolic process; protein metabolic process; lymphocyte media…	extracellular exosome; organelle; blood microparticle; extracellular space; extracellular region part; vesicle; extracellular vesicle; membrane-bounded organelle; extracellular region; extracellular organelle;	serine-type endopeptidase activity; endopeptidase activity; peptidase activity; catalytic activity; serine hydrolase activity; binding; ion binding; serine-type peptidase activity; cation binding; metal ion binding; peptidase activity, acting on L-amino acid peptides; protein binding; hydrolase activity; calcium ion binding;	K01330	C1R; complement component 1, r subcomponent [EC:3.4.21.41]	hsa05322 Systemic lupus erythematosus - Homo sapiens (human); hsa05133 Pertussis - Homo sapiens (human); hsa04610 Complement and coagulation cascades - Homo sapiens (human); hsa05150 Staphylococcus aureus infection - Homo sapiens (human); hsa04145 Phagosome - Homo sapiens (human);	IPR009003; IPR000859; IPR000436; IPR001254; IPR001881; IPR000742;	Peptidase S1, PA clan; CUB domain; Sushi/SCR/CCP domain; Serine proteases, trypsin domain; EGF-like calcium-binding domain; EGF-like domain;		E	KOG3627	Trypsin
Q9C0C2	429	S	182 kDa tankyrase-1-binding protein	TNKS1BP1	0.459	0.0386	Down	Q1	0.999998	3.19e-20	161.51	RFS(1)EGVLQSPSQDQEK	3	1.8403	nucleus	single organism signaling; negative regulation of cell cycle G1/S phase transition; regulation of biological quality; positive regulation of cellular protein metabolic process; regulation of cell cycle process; cellular metabolic process; signal transduction involved in mitotic G1 DNA damage checkpoint; signal transduction involved in mitotic DNA integrity checkpoint; metabolic process; regulatio…	cell junction; cytoplasm; macromolecular complex; intracellular part; cell-cell adherens junction; cell; cell-cell junction; organelle part; heterochromatin; chromosomal part; non-membrane-bounded organelle; cytoskeleton; membrane-enclosed lumen; intracellular organelle lumen; nuclear chromosome part; intracellular; cell part; chromosome; nuclear chromatin; adherens junction; CCR4-NOT complex; me…	cell adhesion molecule binding; binding; cadherin binding; macromolecular complex binding; protein binding; protein domain specific binding; ankyrin repeat binding; enzyme binding;				IPR032764;	Tankyrase 1-binding protein, C-terminal;
P08133	303	S	Annexin A6	ANXA6	0.462	8.73e-05	Down	Q1	0.994666	0.0558	53.756	S(0.005)LY(0.001)S(0.995)MIK	2	0.77324	cytoplasm	cellular component biogenesis; regulation of cellular process; single organism signaling; cellular component organization; regulation of biological quality; divalent inorganic cation transport; cellular divalent inorganic cation homeostasis; ion transmembrane transport; apoptotic signaling pathway; protein homooligomerization; metal ion transport; cellular cation homeostasis; single-organism proc…	membrane; extracellular region part; organelle membrane; cytoplasmic vesicle; cell junction; cytoplasm; vesicle; cytoplasmic vesicle part; intracellular part; cell; organelle part; pigment granule; lysosomal membrane; extracellular exosome; focal adhesion; late endosome membrane; intracellular; cell part; whole membrane; lysosome; adherens junction; extracellular vesicle; perinuclear region of cy…	nucleoside phosphate binding; sterol binding; protein dimerization activity; passive transmembrane transporter activity; substrate-specific transporter activity; protein binding; calcium-dependent protein binding; steroid binding; channel activity; substrate-specific transmembrane transporter activity; heterocyclic compound binding; organic cyclic compound binding; identical protein binding; ribo…	K17094					LRP-1-Alpha-2-M-annexin VI complex;	U	KOG0819	Annexin
Q8WXI9	120	T	Transcriptional repressor p66-beta	GATAD2B	0.462	0.000281	Down	Q1	0.99999	1.75e-08	68.96	GRLT(1)PS(1)PDIIVLS(0.309)DNEAS(0.365)S(0.327)PR	3	0.26189	cytoplasm	regulation of cellular process; cellular component organization; chromatin remodeling; cellular aromatic compound metabolic process; nucleic acid-templated transcription; regulation of macromolecule metabolic process; regulation of nucleobase-containing compound metabolic process; biosynthetic process; cellular metabolic process; organic substance metabolic process; regulation of RNA biosynthetic…	intracellular organelle; intracellular non-membrane-bounded organelle; intracellular organelle part; macromolecular complex; nuclear lumen; intracellular part; nuclear body; cell; organelle part; chromosomal part; non-membrane-bounded organelle; organelle; intracellular membrane-bounded organelle; membrane-enclosed lumen; nucleoplasm; nucleus; intracellular organelle lumen; chromatin; nuclear chr…	organic cyclic compound binding; heterocyclic compound binding; DNA binding; transition metal ion binding; binding; nucleic acid binding transcription factor activity; nucleic acid binding; ion binding; cation binding; metal ion binding; protein binding; zinc ion binding; sequence-specific DNA binding; transcription factor activity, sequence-specific DNA binding;				IPR013088; IPR032346; IPR000679;	Zinc finger, NHR/GATA-type; Transcriptional repressor p66, coiled-coil MBD2-interaction domain; Zinc finger, GATA-type;	HDAC2-asscociated core complex; MeCP1 complex; LARC complex (LCR-associated remodeling complex); HDAC1-associated core complex cII;	S	KOG3740	Uncharacterized conserved protein
Q8WXI9	122	S	Transcriptional repressor p66-beta	GATAD2B	0.462	0.000281	Down	Q1	0.999981	1.75e-08	88.186	GRLT(1)PS(1)PDIIVLS(0.309)DNEAS(0.365)S(0.327)PR	3	0.26189	cytoplasm	regulation of cellular process; cellular component organization; chromatin remodeling; cellular aromatic compound metabolic process; nucleic acid-templated transcription; regulation of macromolecule metabolic process; regulation of nucleobase-containing compound metabolic process; biosynthetic process; cellular metabolic process; organic substance metabolic process; regulation of RNA biosynthetic…	intracellular organelle; intracellular non-membrane-bounded organelle; intracellular organelle part; macromolecular complex; nuclear lumen; intracellular part; nuclear body; cell; organelle part; chromosomal part; non-membrane-bounded organelle; organelle; intracellular membrane-bounded organelle; membrane-enclosed lumen; nucleoplasm; nucleus; intracellular organelle lumen; chromatin; nuclear chr…	organic cyclic compound binding; heterocyclic compound binding; DNA binding; transition metal ion binding; binding; nucleic acid binding transcription factor activity; nucleic acid binding; ion binding; cation binding; metal ion binding; protein binding; zinc ion binding; sequence-specific DNA binding; transcription factor activity, sequence-specific DNA binding;				IPR013088; IPR032346; IPR000679;	Zinc finger, NHR/GATA-type; Transcriptional repressor p66, coiled-coil MBD2-interaction domain; Zinc finger, GATA-type;	HDAC2-asscociated core complex; MeCP1 complex; LARC complex (LCR-associated remodeling complex); HDAC1-associated core complex cII;	S	KOG3740	Uncharacterized conserved protein
Q9ULP9	28	S	TBC1 domain family member 24	TBC1D24	0.462	0.0107	Down	Q1	0.991954	0.000137	96.673	ELS(0.992)CT(0.008)ELQELK	2	-0.28877	cytoplasm	cellular component organization; single-multicellular organism process; neuron development; cellular developmental process; single-organism process; neurogenesis; cell development; cell differentiation; positive regulation of hydrolase activity; positive regulation of molecular function; multicellular organism development; cellular process; nervous system development; developmental process; posit…	membrane; cell projection; cell periphery; cell junction; neuromuscular junction; cytoplasm; intracellular part; cell; cell projection part; axon part; axon terminus; plasma membrane; synapse; axon; intracellular; presynapse; cell part; terminal bouton; neuron projection; neuron projection terminus; neuron part; synapse part;	enzyme regulator activity; nucleoside-triphosphatase regulator activity; binding; GTPase regulator activity; protein binding; molecular function regulator; enzyme activator activity; GTPase activator activity;				IPR006571; IPR000195;	TLDc domain; Rab-GTPase-TBC domain;		U	KOG2801	Probable Rab-GAPs
P55265	601	T	Double-stranded RNA-specific adenosine deaminase	ADAR	0.463	0.00691	Down	Q1	0.882839	1.58e-20	142.23	T(0.002)AES(0.03)QT(0.883)PT(0.085)PSATSFFSGK	3	0.29417	nucleus	cellular component biogenesis; single organism signaling; regulation of cell death; chordate embryonic development; posttranscriptional regulation of gene expression; defense response to other organism; regulation of defense response; RNA modification; cellular metabolic process; response to biotic stimulus; metabolic process; macromolecular complex assembly; embryo development; protein import in…	intracellular organelle; membrane; intracellular non-membrane-bounded organelle; intracellular organelle part; cytoplasm; macromolecular complex; nuclear lumen; intracellular part; spliceosomal complex; nucleolus; cell; supraspliceosomal complex; organelle part; non-membrane-bounded organelle; organelle; intracellular membrane-bounded organelle; membrane-enclosed lumen; nucleoplasm; nucleus; intr…	RNA binding; DNA binding; adenosine deaminase activity; ion binding; hydrolase activity; protein binding; heterocyclic compound binding; organic cyclic compound binding; hydrolase activity, acting on carbon-nitrogen (but not peptide) bonds, in cyclic amidines; double-stranded RNA adenosine deaminase activity; catalytic activity; binding; nucleic acid binding; metal ion binding; deaminase activity…	K12968	ADAR; double-stranded RNA-specific adenosine deaminase [EC:3.5.4.37]	hsa04623 Cytosolic DNA-sensing pathway - Homo sapiens (human); hsa05162 Measles - Homo sapiens (human); hsa05164 Influenza A - Homo sapiens (human);	IPR011991; IPR002466; IPR000607; IPR014720;	Winged helix-turn-helix DNA-binding domain; Adenosine deaminase/editase; Double-stranded RNA-specific adenosine deaminase (DRADA); Double-stranded RNA-binding domain;	ADAR1-CDK2 complex; DHX9-ADAR-vigilin-DNA-PK-Ku antigen complex;	A	KOG2777	tRNA-specific adenosine deaminase 1
Q01433	192	S	AMP deaminase 2	AMPD2	0.467	0.00589	Down	Q1	0.750435	1.81e-13	163.71	T(0.004)DS(0.245)DS(0.75)DLQLYK	3	0.047575	mitochondria	regulation of biological quality; nucleoside metabolic process; purine nucleoside metabolic process; purine ribonucleoside monophosphate metabolic process; cellular developmental process; nucleotide metabolic process; single-organism process; biosynthetic process; ribonucleoside monophosphate biosynthetic process; IMP metabolic process; cellular metabolic process; multicellular organismal homeost…	cell part; intracellular; cytoplasm; intracellular part; cytosol; cell; cytoplasmic part;	adenosine-phosphate deaminase activity; hydrolase activity, acting on carbon-nitrogen (but not peptide) bonds, in cyclic amidines; catalytic activity; binding; ion binding; deaminase activity; cation binding; metal ion binding; protein binding; hydrolase activity; AMP deaminase activity; hydrolase activity, acting on carbon-nitrogen (but not peptide) bonds;	K01490	AMPD; AMP deaminase [EC:3.5.4.6]	hsa00230 Purine metabolism - Homo sapiens (human); hsa01100 Metabolic pathways - Homo sapiens (human);	IPR001365; IPR032466;	Adenosine/AMP deaminase domain; Metal-dependent hydrolase;		F	KOG1096	Adenosine monophosphate deaminase
Q08357	259	S	Sodium-dependent phosphate transporter 2	SLC20A2	0.467	0.00891	Down	Q1	0.998342	2.63e-05	90.718	EGALS(0.005)RVS(0.995)DES(0.998)LS(0.002)K	3	0.36684	plasma membrane	entry into host; inorganic anion transmembrane transport; sodium ion transmembrane transport; ion transmembrane transport; metal ion transport; entry into cell of other organism involved in symbiotic interaction; viral life cycle; multi-organism cellular process; anion transmembrane transport; establishment of localization; cation transport; viral process; phosphate ion transport; interspecies in…	membrane; extracellular region part; intrinsic component of plasma membrane; cell periphery; vesicle; intrinsic component of membrane; integral component of plasma membrane; cell; extracellular region; integral component of membrane; plasma membrane; organelle; extracellular exosome; plasma membrane part; cell part; membrane part; extracellular vesicle; membrane-bounded organelle; extracellular o…	solute:cation symporter activity; active transmembrane transporter activity; secondary active transmembrane transporter activity; ion transmembrane transporter activity; active ion transmembrane transporter activity; sodium:phosphate symporter activity; symporter activity; substrate-specific transporter activity; monovalent inorganic cation transmembrane transporter activity; virus receptor activ…	K14640						P	KOG2493	Na+/Pi symporter
Q13501	24	S	Sequestosome-1	SQSTM1	0.467	0.00241	Down	Q1	0.939024	4.76e-19	115.05	RFS(0.939)FCCS(0.061)PEPEAEAEAAAGPGPCER	3	-2.7997	nucleus	cellular component biogenesis; single organism signaling; regulation of biological quality; regulation of cell death; positive regulation of cellular protein metabolic process; positive regulation of biosynthetic process; autophagy; regulation of mitochondrion organization; cellular metabolic process; metabolic process; macromolecular complex assembly; regulation of I-kappaB kinase/NF-kappaB sign…	extracellular region part; endoplasmic reticulum; cytoplasmic vesicle; P-body; vesicle; cytoplasm; sperm flagellum; 9+2 motile cilium; autolysosome; macromolecular complex; intracellular part; nuclear body; cell; organelle part; cytoplasmic ribonucleoprotein granule; autophagosome; non-membrane-bounded organelle; membrane-enclosed lumen; extracellular exosome; PML body; nucleoplasm; intracellular…	polyubiquitin binding; phosphotransferase activity, alcohol group as acceptor; protein tyrosine kinase binding; ubiquitin protein ligase binding; receptor binding; protein dimerization activity; ion binding; protein kinase binding; protein binding; protein kinase activity; zinc ion binding; kinase binding; ubiquitin-like protein binding; kinase activity; identical protein binding; transition meta…	K14381	SQSTM1; sequestosome 1	hsa04380 Osteoclast differentiation - Homo sapiens (human); hsa05418 Fluid shear stress and atherosclerosis - Homo sapiens (human);	IPR000270; IPR015940; IPR000433; IPR009060; IPR033741;	PB1 domain; Ubiquitin-associated domain; Zinc finger, ZZ-type; UBA-like; Sequestosome-1, UBA domain;	MAP2K5-PRKCI-SQSTM1 complex;	R	KOG4582	Uncharacterized conserved protein, contains ZZ-type Zn-finger
Q96PK6	618	S	RNA-binding protein 14	RBM14	0.467	0.00549	Down	Q1	0.999734	2.36e-11	164.22	RLS(1)ESQLSFR	3	0.024307	nucleus	cellular component biogenesis; single organism signaling; cell surface receptor signaling pathway; nucleic acid-templated transcription; positive regulation of biosynthetic process; negative regulation of organelle assembly; regulation of cell cycle process; cellular metabolic process; metabolic process; transmembrane receptor protein serine/threonine kinase signaling pathway; regulation of centr…	intracellular organelle; intracellular non-membrane-bounded organelle; intracellular organelle part; cytoplasm; macromolecular complex; nuclear lumen; intracellular part; nucleolus; nuclear body; transcription factor complex; cell; organelle part; non-membrane-bounded organelle; organelle; intracellular membrane-bounded organelle; membrane-enclosed lumen; nucleoplasm; nucleus; intracellular organ…	RNA binding; nucleoside phosphate binding; protein binding, bridging; protein binding; nucleotide binding; transcription cofactor activity; heterocyclic compound binding; organic cyclic compound binding; transcription factor activity, RNA polymerase II transcription factor binding; RNA polymerase II transcription cofactor activity; ligand-dependent nuclear receptor transcription coactivator activ…	K13189			IPR000504; IPR012677;	RNA recognition motif domain; Nucleotide-binding alpha-beta plait domain;		AR	KOG0109	RNA-binding protein LARK, contains RRM and retroviral-type Zn-finger domains
O60504	545	S	Vinexin	SORBS3	0.468	0.0101	Down	Q1	0.99463	0.000106	127.7	HPS(0.004)S(0.995)PS(0.001)ALR	2	-0.17903	nucleus	muscle system process; positive regulation of cellular protein metabolic process; regulation of signaling; positive regulation of intracellular signal transduction; single-organism process; negative regulation of RNA metabolic process; positive regulation of cellular component organization; biological adhesion; regulation of RNA biosynthetic process; actin cytoskeleton organization; regulation of…	intracellular organelle; intracellular non-membrane-bounded organelle; cell junction; cytoplasm; anchoring junction; intracellular part; cell; cytosol; non-membrane-bounded organelle; organelle; cytoskeleton; intracellular membrane-bounded organelle; nucleus; focal adhesion; intracellular; cell part; adherens junction; cell-substrate junction; membrane-bounded organelle; cell-substrate adherens j…	cytoskeletal protein binding; structural constituent of cytoskeleton; vinculin binding; binding; protein binding; structural molecule activity; transcription factor binding;				IPR001452; IPR003127;	SH3 domain; SoHo domain;		T	KOG4225	Sorbin and SH3 domain-containing protein
Q13557	330	S	Calcium/calmodulin-dependent protein kinase type II subunit delta	CAMK2D	0.468	0.0024	Down	Q1	0.825283	9.53e-12	101.66	KPDGVKES(0.825)T(0.344)ES(0.814)S(0.013)NT(0.003)TIEDEDVK	4	-0.32677	cytoplasm	single organism signaling; cellular component biogenesis; regulation of cell death; regulation of biological quality; cell surface receptor signaling pathway; positive regulation of muscle hypertrophy; regulation of relaxation of cardiac muscle; negative regulation of sodium ion transport; negative regulation of sodium ion transmembrane transport; cellular response to cytokine stimulus; cellular …	membrane; endoplasmic reticulum; nuclear outer membrane-endoplasmic reticulum membrane network; cytoplasmic vesicle; organelle membrane; cell periphery; vesicle; cytoplasm; cytoplasmic vesicle part; intracellular part; sarcoplasm; cell; organelle part; sarcoplasmic reticulum membrane; membrane-enclosed lumen; nucleoplasm; intracellular organelle lumen; membrane part; intracellular; cell part; who…	ion channel inhibitor activity; nucleoside phosphate binding; phosphotransferase activity, alcohol group as acceptor; guanyl-nucleotide exchange factor activity; protein dimerization activity; ion channel regulator activity; protein binding; sodium channel regulator activity; calmodulin-dependent protein kinase activity; protein kinase activity; molecular function regulator; channel inhibitor act…	K04515	CAMK2; calcium/calmodulin-dependent protein kinase (CaM kinase) II [EC:2.7.11.17]	hsa04921 Oxytocin signaling pathway - Homo sapiens (human); hsa05152 Tuberculosis - Homo sapiens (human); hsa04728 Dopaminergic synapse - Homo sapiens (human); hsa04722 Neurotrophin signaling pathway - Homo sapiens (human); hsa05031 Amphetamine addiction - Homo sapiens (human); hsa04916 Melanogenesis - Homo sapiens (human); hsa04020 Calcium signaling pathway - Homo sapiens (human); hsa04024 cAMP …	IPR000719; IPR013543; IPR011009; IPR032710;	Protein kinase domain; Calcium/calmodulin-dependent protein kinase II, association-domain; Protein kinase-like domain; NTF2-like domain;	CAMK2-delta-MASH1 promoter-coactivator complex;	T	KOG0033	Ca2+/calmodulin-dependent protein kinase, EF-Hand protein superfamily
Q6DN90	512	S	IQ motif and SEC7 domain-containing protein 1	IQSEC1	0.469	0.00229	Down	Q1	0.977752	3.28e-18	161.08	NS(0.978)WDS(0.021)PAFS(0.001)NDVIR	2	-4.1282	cytoplasm	regulation of cellular process; cellular component organization; regulation of intracellular signal transduction; positive regulation of GTPase activity; regulation of signaling; single-organism cellular process; single-organism process; regulation of Ras protein signal transduction; positive regulation of catalytic activity; single-organism organelle organization; actin cytoskeleton organization…	membrane; intracellular organelle; intracellular non-membrane-bounded organelle; intracellular organelle part; cytoplasm; nuclear lumen; intracellular part; nucleolus; cell; organelle part; non-membrane-bounded organelle; organelle; intracellular membrane-bounded organelle; membrane-enclosed lumen; nucleus; intracellular organelle lumen; intracellular; cell part; membrane-bounded organelle; organ…	lipid binding; protein binding; molecular function regulator; ARF guanyl-nucleotide exchange factor activity; guanyl-nucleotide exchange factor activity; binding;	K12495	IQSEC; IQ motif and SEC7 domain-containing protein	hsa04144 Endocytosis - Homo sapiens (human);	IPR023394; IPR033742; IPR011993; IPR000904; IPR001849;	Sec7 domain, alpha orthogonal bundle; IQ motif and SEC7 domain-containing protein, PH domain; PH domain-like; Sec7 domain; Pleckstrin homology domain;		U	KOG0931	Predicted guanine nucleotide exchange factor, contains Sec7 domain
Q9UBC2	708	S	Epidermal growth factor receptor substrate 15-like 1	EPS15L1	0.469	0.00443	Down	Q1	0.795839	1.82e-06	94.911	LDPFES(0.203)S(0.796)DPFS(0.001)SSSVSSK	3	0.77234	nucleus	regulation of cellular process; cellular component organization; negative regulation of signal transduction; negative regulation of ERBB signaling pathway; vesicle-mediated transport; regulation of signaling; negative regulation of response to stimulus; negative regulation of cellular process; negative regulation of biological process; endocytosis; establishment of localization; transport; negati…	intracellular organelle; membrane; membrane protein complex; cell periphery; coated membrane; cytoplasm; plasma membrane protein complex; macromolecular complex; endomembrane system; intracellular part; cytosol; cell; plasma membrane; intracellular membrane-bounded organelle; organelle; nucleus; plasma membrane part; membrane part; intracellular; cell part; whole membrane; membrane region; clathr…	cell adhesion molecule binding; binding; ion binding; cadherin binding; cation binding; metal ion binding; protein binding; calcium ion binding;	K12472	EPS15; epidermal growth factor receptor substrate 15	hsa04144 Endocytosis - Homo sapiens (human);	IPR000261; IPR002048; IPR011992;	EH domain; EF-hand domain; EF-hand domain pair;		TU	KOG0998	Synaptic vesicle protein EHS-1 and related EH domain proteins
Q16851	435	S	UTP--glucose-1-phosphate uridylyltransferase	UGP2	0.47	0.000868	Down	Q1	0.853022	0.00182	112.11	LGS(0.073)S(0.853)FT(0.073)K	2	-0.14123	cytoplasm	nucleotide-sugar biosynthetic process; organic acid biosynthetic process; UDP-glucuronate metabolic process; single-organism process; biosynthetic process; cellular metabolic process; phosphate-containing compound metabolic process; cellular polysaccharide metabolic process; metabolic process; generation of precursor metabolites and energy; carbohydrate derivative biosynthetic process; cellular c…	intracellular organelle; extracellular region part; vesicle; cytoplasm; intracellular part; cell; cytosol; extracellular region; intracellular membrane-bounded organelle; organelle; extracellular exosome; nucleus; intracellular; cell part; extracellular vesicle; membrane-bounded organelle; extracellular organelle; cytoplasmic part;	pyrimidine ribonucleotide binding; nucleoside phosphate binding; glucose binding; ion binding; protein binding; monosaccharide binding; nucleotide binding; uridylyltransferase activity; heterocyclic compound binding; organic cyclic compound binding; carbohydrate derivative binding; identical protein binding; nucleotidyltransferase activity; UTP:glucose-1-phosphate uridylyltransferase activity; ri…	K00963	UGP2; UTP--glucose-1-phosphate uridylyltransferase [EC:2.7.7.9]	hsa00040 Pentose and glucuronate interconversions - Homo sapiens (human); hsa01100 Metabolic pathways - Homo sapiens (human); hsa00500 Starch and sucrose metabolism - Homo sapiens (human); hsa00052 Galactose metabolism - Homo sapiens (human); hsa00520 Amino sugar and nucleotide sugar metabolism - Homo sapiens (human);	IPR029044;	Nucleotide-diphospho-sugar transferases;		G	KOG2638	UDP-glucose pyrophosphorylase
O43175	78	T	D-3-phosphoglycerate dehydrogenase	PHGDH	0.471	0.00217	Down	Q1	1	1.28e-18	165.19	AGT(1)GVDNVDLEAATR	2	0.7372	cytoplasm	organic acid biosynthetic process; chordate embryonic development; brain development; neuron development; cellular developmental process; neurogenesis; single-organism process; biosynthetic process; glycine metabolic process; cellular metabolic process; metabolic process; cellular amino acid metabolic process; alpha-amino acid biosynthetic process; monocarboxylic acid metabolic process; head deve…	extracellular region part; vesicle; cytoplasm; intracellular part; cytosol; cell; extracellular region; organelle; extracellular exosome; myelin sheath; intracellular; cell part; extracellular vesicle; membrane-bounded organelle; extracellular organelle; cytoplasmic part;	organic cyclic compound binding; heterocyclic compound binding; oxidoreductase activity, acting on CH-OH group of donors; electron carrier activity; oxidoreductase activity, acting on the CH-OH group of donors, NAD or NADP as acceptor; nucleoside phosphate binding; NAD binding; catalytic activity; binding; phosphoglycerate dehydrogenase activity; nucleotide binding; cofactor binding; small molecu…	K00058	serA; D-3-phosphoglycerate dehydrogenase [EC:1.1.1.95]	hsa01100 Metabolic pathways - Homo sapiens (human); hsa00260 Glycine, serine and threonine metabolism - Homo sapiens (human); hsa01230 Biosynthesis of amino acids - Homo sapiens (human); hsa01200 Carbon metabolism - Homo sapiens (human);	IPR006139; IPR006140; IPR029009; IPR016040;	D-isomer specific 2-hydroxyacid dehydrogenase, catalytic domain; D-isomer specific 2-hydroxyacid dehydrogenase, NAD-binding domain; Allosteric substrate binding domain; NAD(P)-binding domain;		E	KOG0068	D-3-phosphoglycerate dehydrogenase, D-isomer-specific 2-hydroxy acid dehydrogenase superfamily
P07099	450	S	Epoxide hydrolase 1	EPHX1	0.473	0.000337	Down	Q1	1	0.0285	63.397	FLS(1)VLER	2	-0.3916	endoplasmic reticulum	cellular response to xenobiotic stimulus; cellular response to stimulus; response to organic cyclic compound; cellular aromatic compound metabolic process; response to toxic substance; response to organic substance; response to stimulus; cellular metabolic process; aromatic compound catabolic process; metabolic process; response to chemical; response to xenobiotic stimulus; xenobiotic metabolic p…	membrane; intracellular organelle; nuclear outer membrane-endoplasmic reticulum membrane network; endoplasmic reticulum; organelle membrane; intracellular organelle part; cytoplasm; intrinsic component of membrane; endomembrane system; intracellular part; cell; integral component of membrane; organelle part; organelle; intracellular membrane-bounded organelle; endoplasmic reticulum part; membrane…	cis-stilbene-oxide hydrolase activity; hydrolase activity; hydrolase activity, acting on ether bonds; epoxide hydrolase activity; catalytic activity; ether hydrolase activity;	K01253	EPHX1; microsomal epoxide hydrolase [EC:3.3.2.9]	hsa04976 Bile secretion - Homo sapiens (human); hsa05204 Chemical carcinogenesis - Homo sapiens (human); hsa00980 Metabolism of xenobiotics by cytochrome P450 - Homo sapiens (human);	IPR010497; IPR029058;	Epoxide hydrolase, N-terminal; Alpha/Beta hydrolase fold;		R	KOG2565	Predicted hydrolases or acyltransferases (alpha/beta hydrolase superfamily)
Q8NI27	1393	S	THO complex subunit 2	THOC2	0.474	0.0261	Down	Q1	0.988448	0.000252	74.726	TPVS(0.001)GS(0.01)LKS(0.988)PVPR	3	0.30129	cytoplasm	RNA transport; nucleic acid-templated transcription; neuron development; cellular developmental process; single-organism process; neurogenesis; biosynthetic process; multi-organism cellular localization; nuclear export; nuclear transport; multi-organism cellular process; cellular metabolic process; protein transport; establishment of localization; DNA-templated transcription, termination; multi-o…	intracellular organelle; intracellular organelle part; nuclear lumen; macromolecular complex; intracellular part; THO complex; nuclear body; THO complex part of transcription export complex; cell; organelle part; membrane-enclosed lumen; intracellular membrane-bounded organelle; organelle; nucleoplasm; nucleus; intracellular organelle lumen; nuclear speck; intracellular; cell part; transcription …	organic cyclic compound binding; heterocyclic compound binding; mRNA binding; RNA binding; binding; nucleic acid binding; protein binding;	K12879	THOC2; THO complex subunit 2	hsa03040 Spliceosome - Homo sapiens (human); hsa03013 RNA transport - Homo sapiens (human);	IPR021418; IPR032302; IPR021726;	THO complex, subunitTHOC2, C-terminal; THO complex subunit 2, N-terminal domain; THO complex, subunitTHOC2, N-terminal;	TREX complex; THO complex; Spliceosome;	K	KOG1874	KEKE-like motif-containing transcription regulator (Rlr1)/suppressor of sin4
Q13557	331	T	Calcium/calmodulin-dependent protein kinase type II subunit delta	CAMK2D	0.476	0.00355	Down	Q1	0.864807	1.93e-27	147.17	KPDGVKES(0.125)T(0.865)ES(0.009)SNTTIEDEDVK	5	0.48602	cytoplasm	single organism signaling; cellular component biogenesis; regulation of cell death; regulation of biological quality; cell surface receptor signaling pathway; positive regulation of muscle hypertrophy; regulation of relaxation of cardiac muscle; negative regulation of sodium ion transport; negative regulation of sodium ion transmembrane transport; cellular response to cytokine stimulus; cellular …	membrane; endoplasmic reticulum; nuclear outer membrane-endoplasmic reticulum membrane network; cytoplasmic vesicle; organelle membrane; cell periphery; vesicle; cytoplasm; cytoplasmic vesicle part; intracellular part; sarcoplasm; cell; organelle part; sarcoplasmic reticulum membrane; membrane-enclosed lumen; nucleoplasm; intracellular organelle lumen; membrane part; intracellular; cell part; who…	ion channel inhibitor activity; nucleoside phosphate binding; phosphotransferase activity, alcohol group as acceptor; guanyl-nucleotide exchange factor activity; protein dimerization activity; ion channel regulator activity; protein binding; sodium channel regulator activity; calmodulin-dependent protein kinase activity; protein kinase activity; molecular function regulator; channel inhibitor act…	K04515	CAMK2; calcium/calmodulin-dependent protein kinase (CaM kinase) II [EC:2.7.11.17]	hsa04921 Oxytocin signaling pathway - Homo sapiens (human); hsa05152 Tuberculosis - Homo sapiens (human); hsa04728 Dopaminergic synapse - Homo sapiens (human); hsa04722 Neurotrophin signaling pathway - Homo sapiens (human); hsa05031 Amphetamine addiction - Homo sapiens (human); hsa04916 Melanogenesis - Homo sapiens (human); hsa04020 Calcium signaling pathway - Homo sapiens (human); hsa04024 cAMP …	IPR000719; IPR013543; IPR011009; IPR032710;	Protein kinase domain; Calcium/calmodulin-dependent protein kinase II, association-domain; Protein kinase-like domain; NTF2-like domain;	CAMK2-delta-MASH1 promoter-coactivator complex;	T	KOG0033	Ca2+/calmodulin-dependent protein kinase, EF-Hand protein superfamily
Q9H4M7	271	T	Pleckstrin homology domain-containing family A member 4	PLEKHA4	0.477	0.0024	Down	Q1	0.994899	3.58e-12	112.34	RPPAPSGDTAPPARPHT(0.995)PLS(0.005)R	4	-0.38475	mitochondria	glycerolipid metabolic process; single-organism biosynthetic process; phosphatidylinositol biosynthetic process; phospholipid biosynthetic process; single-organism cellular process; single-organism process; biosynthetic process; cellular lipid metabolic process; primary metabolic process; cellular metabolic process; organic substance biosynthetic process; phosphate-containing compound metabolic p…	membrane; cell periphery; cell part; intracellular; cytoplasm; intracellular part; cell; plasma membrane;	1-phosphatidylinositol binding; binding; phospholipid binding; phosphatidylinositol binding; ion binding; lipid binding; anion binding;				IPR011993; IPR001849;	PH domain-like; Pleckstrin homology domain;		F	KOG1738	Membrane-associated guanylate kinase-interacting protein/connector enhancer of KSR-like
Q86SQ0	415	S	Pleckstrin homology-like domain family B member 2	PHLDB2	0.478	0.0193	Down	Q1	0.898058	0.000187	114.7	KS(0.094)S(0.898)IS(0.006)S(0.002)ISGR	2	0.26918	nucleus	negative regulation of developmental process; negative regulation of morphogenesis of an epithelium; regulation of epithelial to mesenchymal transition; regulation of adherens junction organization; negative regulation of cellular component organization; regulation of cell-substrate junction assembly; positive regulation of basement membrane assembly involved in embryonic body morphogenesis; esta…	intracellular organelle; membrane; cell leading edge; cell cortex; intracellular non-membrane-bounded organelle; cell periphery; basal cortex; cytoplasm; cytoplasmic region; intracellular part; cytosol; cell; plasma membrane; non-membrane-bounded organelle; organelle; cytoskeleton; intermediate filament cytoskeleton; cell cortex region; cell part; cell cortex part; intracellular; cytoplasmic part…	cell adhesion molecule binding; protein binding; binding; cadherin binding;				IPR011993; IPR001849;	PH domain-like; Pleckstrin homology domain;		Z	KOG0248	Cytoplasmic protein Max-1, contains PH, MyTH4 and FERM domains
O60885	1117	S	Bromodomain-containing protein 4	BRD4	0.479	0.0188	Down	Q1	1	0.000396	91.069	IHS(1)PIIR	3	-0.34605	nucleus	nucleic acid-templated transcription; positive regulation of biosynthetic process; regulation of defense response; regulation of cell cycle process; cellular metabolic process; metabolic process; regulation of I-kappaB kinase/NF-kappaB signaling; regulation of mitotic cell cycle phase transition; regulation of DNA-templated transcription, elongation; cell cycle phase transition; macromolecule met…	intracellular organelle; intracellular non-membrane-bounded organelle; intracellular organelle part; cytoplasm; nuclear lumen; intracellular part; cytosol; cell; organelle part; non-membrane-bounded organelle; condensed chromosome; intracellular membrane-bounded organelle; organelle; membrane-enclosed lumen; nucleoplasm; nucleus; intracellular organelle lumen; intracellular; cell part; chromosome…	histone binding; RNA polymerase core enzyme binding; p53 binding; basal RNA polymerase II transcription machinery binding; basal transcription machinery binding; lysine-acetylated histone binding; binding; RNA polymerase II core binding; macromolecular complex binding; protein binding; chromatin binding; RNA polymerase binding; enzyme binding; protein complex binding;	K11722			IPR027353; IPR001487; IPR031354;	NET domain; Bromodomain; Bromodomain protein 4, C-terminal;	BRD4-RFC complex; BRD4-P-TEFb complex; BRD4 complex; P-TEFb-BRD4-TRAP220 complex;	K	KOG1474	Transcription initiation factor TFIID, subunit BDF1 and related bromodomain proteins
Q8TD19	331	S	Serine/threonine-protein kinase Nek9	NEK9	0.48	0.0145	Down	Q1	0.948647	3.82e-19	165.66	S(0.949)S(0.045)T(0.002)VT(0.004)EAPIAVVTSR	2	0.048007	cytoplasm	phosphorylation; cellular component organization; nucleus organization; endomembrane system organization; mitotic nuclear division; organelle fission; cellular protein metabolic process; single-organism process; cellular metabolic process; mitotic cell cycle process; phosphate-containing compound metabolic process; organic substance metabolic process; nuclear envelope organization; metabolic proc…	organelle; intracellular membrane-bounded organelle; intracellular organelle; nucleus; cell part; intracellular; cytoplasm; intracellular part; membrane-bounded organelle; cell; cytosol; cytoplasmic part;	nucleoside phosphate binding; phosphotransferase activity, alcohol group as acceptor; protein kinase binding; protein binding; protein kinase activity; organic cyclic compound binding; heterocyclic compound binding; kinase activity; catalytic activity; ribonucleotide binding; binding; purine ribonucleoside binding; cation binding; anion binding; adenyl ribonucleotide binding; adenyl nucleotide bi…	K20878			IPR009091; IPR000719; IPR011009;	Regulator of chromosome condensation 1/beta-lactamase-inhibitor protein II; Protein kinase domain; Protein kinase-like domain;	FACT-NEK9 complex;	R	KOG0589	Serine/threonine protein kinase
P02786	34	S	Transferrin receptor protein 1	TFRC	0.481	0.0427	Down	Q1	1	0.000187	76.158	QVDGDNS(1)HVEMK	3	-0.43439	plasma membrane	entry into host; regulation of leukocyte activation; regulation of isotype switching; regulation of biological quality; regulation of mononuclear cell proliferation; positive regulation of adaptive immune response based on somatic recombination of immune receptors built from immunoglobulin superfamily domains; cellular metabolic process; protein transport; regulation of B cell proliferation; tran…	basolateral plasma membrane; membrane; extracellular space; extracellular region part; external side of plasma membrane; organelle membrane; cytoplasmic vesicle; cell periphery; cytoplasm; vesicle; cytoplasmic vesicle part; macromolecular complex; intrinsic component of membrane; intracellular part; integral component of plasma membrane; cell; organelle part; coated vesicle membrane; pigment gran…	primary active transmembrane transporter activity; protein dimerization activity; substrate-specific transporter activity; protein transmembrane transporter activity; cargo receptor activity; protein binding; transferrin receptor activity; substrate-specific transmembrane transporter activity; organic cyclic compound binding; heterocyclic compound binding; metal ion transmembrane transporter acti…	K06503	TFRC; transferrin receptor	hsa04144 Endocytosis - Homo sapiens (human); hsa04066 HIF-1 signaling pathway - Homo sapiens (human); hsa04145 Phagosome - Homo sapiens (human); hsa04640 Hematopoietic cell lineage - Homo sapiens (human);	IPR003137; IPR007484; IPR007365;	PA domain; Peptidase M28; Transferrin receptor-like, dimerisation domain;	SNX complex (SNX1a, SNX2, SNX4, TFRC);	OPR	KOG2195	Transferrin receptor and related proteins containing the protease-associated (PA) domain
P04792	65	S	Heat shock protein beta-1	HSPB1	0.482	0.00168	Down	Q1	1	2.49e-14	126.02	PLPPAAIES(1)PAVAAPAYSR	3	0.069057	nucleus	single organism signaling; protein transport along microtubule; blood coagulation; regulation of biological quality; positive regulation of cell migration; regulation of cell death; regulation of tumor necrosis factor production; positive regulation of cytokine biosynthetic process; cell surface receptor signaling pathway; posttranscriptional regulation of gene expression; positive regulation of …	membrane; extracellular space; extracellular region part; cell periphery; cell junction; myofibril; cytoplasmic region; vesicle; cytoplasm; cell projection cytoplasm; macromolecular complex; supramolecular fiber; intracellular part; Z disc; supramolecular complex; cell; I band; organelle part; endopeptidase complex; non-membrane-bounded organelle; cytoskeleton; extracellular exosome; catalytic co…	protein serine/threonine kinase inhibitor activity; RNA binding; protein kinase binding; protein kinase inhibitor activity; protein kinase C inhibitor activity; protein binding; kinase regulator activity; protein kinase regulator activity; enzyme inhibitor activity; molecular function regulator; kinase binding; ubiquitin-like protein binding; protein binding involved in protein folding; heterocyc…	K04455	HSPB1; heat shock protein beta-1	hsa04010 MAPK signaling pathway - Homo sapiens (human); hsa05169 Epstein-Barr virus infection - Homo sapiens (human); hsa04370 VEGF signaling pathway - Homo sapiens (human); hsa05146 Amoebiasis - Homo sapiens (human);	IPR002068; IPR008978;	Alpha crystallin/Hsp20 domain; HSP20-like chaperone;		O	KOG3591	Alpha crystallins
Q9NRY4	770	S	Rho GTPase-activating protein 35	ARHGAP35	0.483	0.00919	Down	Q1	0.991553	1e-19	176.29	NLNLVS(0.004)S(0.992)T(0.004)ASIK	2	0.75042	nucleus	single organism signaling; regulation of biological quality; gland development; regulation of cell projection assembly; nucleic acid-templated transcription; tube formation; chordate embryonic development; brain development; cellular component morphogenesis; regulation of actin filament length; cellular metabolic process; response to external stimulus; metabolic process; actin cytoskeleton organi…	cilium; intracellular organelle; membrane; cell projection; intracellular non-membrane-bounded organelle; cell periphery; cytoskeletal part; intracellular organelle part; cytoplasm; ciliary basal body; intracellular part; cytosol; cell projection part; cell; actin cytoskeleton; organelle part; plasma membrane; non-membrane-bounded organelle; intracellular membrane-bounded organelle; organelle; cy…	RNA polymerase II transcription factor activity, sequence-specific DNA binding; nucleoside phosphate binding; nucleoside-triphosphatase regulator activity; double-stranded DNA binding; GTPase regulator activity; molecular function regulator; transcription factor activity, sequence-specific DNA binding; heterocyclic compound binding; regulatory region DNA binding; organic cyclic compound binding; …	K05732	ARHGAP35; glucocorticoid receptor DNA-binding factor 1	hsa04611 Platelet activation - Homo sapiens (human); hsa04670 Leukocyte transendothelial migration - Homo sapiens (human); hsa04510 Focal adhesion - Homo sapiens (human); hsa04810 Regulation of actin cytoskeleton - Homo sapiens (human);	IPR002713; IPR027417; IPR008936; IPR000198; IPR032835;	FF domain; P-loop containing nucleoside triphosphate hydrolase; Rho GTPase activation protein; Rho GTPase-activating protein domain; Rho GTPase-activating protein, FF domain;		T	KOG4271	Rho-GTPase activating protein
Q07352	54	S	mRNA decay activator protein ZFP36L1	ZFP36L1	0.484	0.0238	Down	Q1	0.999157	0.000316	82.202	RHS(0.999)VT(0.001)LPSSK	3	0.070679	nucleus	RNA transport; single organism signaling; regulation of leukocyte activation; regulation of cell death; regulation of keratinocyte proliferation; reproductive process; posttranscriptional regulation of gene expression; chordate embryonic development; cellular response to corticosteroid stimulus; embryonic placenta development; response to organophosphorus; cellular metabolic process; regulation o…	intracellular organelle; intracellular non-membrane-bounded organelle; P-body; cytoplasm; macromolecular complex; intracellular part; cytosol; cell; cytoplasmic ribonucleoprotein granule; non-membrane-bounded organelle; intracellular membrane-bounded organelle; organelle; nucleus; intracellular; cell part; ribonucleoprotein granule; ribonucleoprotein complex; membrane-bounded organelle; intracell…	DNA binding; RNA binding; AU-rich element binding; mRNA 3'-UTR binding; ion binding; 14-3-3 protein binding; protein binding; mRNA 3'-UTR AU-rich region binding; transcription factor activity, sequence-specific DNA binding; heterocyclic compound binding; organic cyclic compound binding; mRNA binding; binding; nucleic acid binding; nucleic acid binding transcription factor activity; metal ion bind…	K18753			IPR007635; IPR000571;	Tis11B-like protein, N-terminal; Zinc finger, CCCH-type;		R	KOG1677	CCCH-type Zn-finger protein
P04075	36	S	Fructose-bisphosphate aldolase A	ALDOA	0.485	0.00913	Down	Q1	0.899004	1.39e-40	207.39	GILAADES(0.899)T(0.101)GSIAK	2	-0.34215	cytoplasm	cellular component biogenesis; regulation of biological quality; nucleoside metabolic process; leukocyte activation; nucleoside diphosphate phosphorylation; pyridine nucleotide metabolic process; glycolytic process; nucleoside biosynthetic process; purine ribonucleoside biosynthetic process; ribonucleoside diphosphate metabolic process; cellular metabolic process; glucose metabolic process; ribos…	membrane; secretory granule lumen; tertiary granule lumen; extracellular space; extracellular region part; cytoplasmic vesicle; myofibril; cytoplasm; vesicle; cytoplasmic vesicle part; supramolecular fiber; intracellular part; supramolecular complex; cell; I band; ficolin-1-rich granule lumen; organelle part; non-membrane-bounded organelle; cytoskeleton; extracellular exosome; ficolin-1-rich gran…	RNA binding; tubulin binding; lyase activity; protein binding; monosaccharide binding; heterocyclic compound binding; organic cyclic compound binding; cell adhesion molecule binding; identical protein binding; cytoskeletal protein binding; fructose-bisphosphate aldolase activity; catalytic activity; binding; carbon-carbon lyase activity; nucleic acid binding; cadherin binding; actin binding; fruc…	K01623	ALDO; fructose-bisphosphate aldolase, class I [EC:4.1.2.13]	hsa00051 Fructose and mannose metabolism - Homo sapiens (human); hsa04066 HIF-1 signaling pathway - Homo sapiens (human); hsa01100 Metabolic pathways - Homo sapiens (human); hsa00030 Pentose phosphate pathway - Homo sapiens (human); hsa00010 Glycolysis / Gluconeogenesis - Homo sapiens (human); hsa01230 Biosynthesis of amino acids - Homo sapiens (human); hsa01200 Carbon metabolism - Homo sapiens (…	IPR013785;	Aldolase-type TIM barrel;		G	KOG1557	Fructose-biphosphate aldolase
P30622	1009	S	CAP-Gly domain-containing linker protein 1	CLIP1	0.487	0.022	Down	Q1	1	0.00322	77.662	KLS(1)DLEK	3	0.55301	nucleus	positive regulation of protein polymerization; positive regulation of microtubule polymerization; mitotic nuclear division; single-organism process; regulation of microtubule polymerization or depolymerization; localization within membrane; protein transport; establishment of localization; positive regulation of cellular component organization; sister chromatid segregation; establishment of local…	membrane; microtubule; organelle membrane; cytoplasmic microtubule; cytoplasmic vesicle; microtubule plus-end; cytoplasm; vesicle; cytoplasmic vesicle part; macromolecular complex; microtubule end; intracellular part; supramolecular fiber; supramolecular complex; cell; organelle part; chromosomal part; non-membrane-bounded organelle; cytoskeleton; microtubule organizing center; microtubule cytosk…	identical protein binding; cytoskeletal protein binding; transition metal ion binding; protein homodimerization activity; microtubule binding; binding; protein dimerization activity; ion binding; tubulin binding; metal ion binding; cation binding; protein binding; zinc ion binding; microtubule plus-end binding;	K10421	CLIP1; CAP-Gly domain-containing linker protein 1	hsa04150 mTOR signaling pathway - Homo sapiens (human);	IPR000938; IPR032108;	CAP Gly-rich domain; CLIP1, zinc knuckle;	APC-IQGAP1-CLIP-170 complex;	ZR	KOG4568	Cytoskeleton-associated protein and related proteins
P42685	178	T	Tyrosine-protein kinase FRK	FRK	0.488	0.0297	Down	Q1	1	0.00186	87.831	LDEGGFFLT(1)R	2	0.072995	cytoplasm	single organism signaling; leukocyte activation; localization of cell; cell surface receptor signaling pathway; cellular developmental process; peptidyl-tyrosine modification; single-organism process; negative regulation of RNA metabolic process; cellular metabolic process; phosphate-containing compound metabolic process; negative regulation of cell proliferation; establishment of localization; r…	membrane; secretory granule lumen; extracellular region part; extrinsic component of membrane; cytoplasmic vesicle; cell periphery; vesicle; cytoplasm; cytoplasmic vesicle part; intracellular part; azurophil granule lumen; extrinsic component of cytoplasmic side of plasma membrane; cell; cytoplasmic side of plasma membrane; cytoplasmic side of membrane; organelle part; vacuolar lumen; extracellul…	ATP binding; nucleoside phosphate binding; phosphotransferase activity, alcohol group as acceptor; receptor binding; nucleoside binding; ion binding; protein tyrosine kinase activity; protein binding; protein kinase activity; nucleotide binding; organic cyclic compound binding; heterocyclic compound binding; ribonucleoside binding; non-membrane spanning protein tyrosine kinase activity; carbohydr…	K08892			IPR001452; IPR000980; IPR000719; IPR001245; IPR020635; IPR011009;	SH3 domain; SH2 domain; Protein kinase domain; Serine-threonine/tyrosine-protein kinase catalytic domain; Tyrosine-protein kinase, catalytic domain; Protein kinase-like domain;		T	KOG0197	Tyrosine kinases
P37837	237	S	Transaldolase	TALDO1	0.489	0.000647	Down	Q1	1	0.000446	122.7	TIVMGAS(1)FR	2	-0.33713	mitochondria	NADP metabolic process; carbohydrate biosynthetic process; pyridine nucleotide metabolic process; cellular aromatic compound metabolic process; nicotinamide nucleotide metabolic process; nucleotide metabolic process; single-organism process; fructose 6-phosphate metabolic process; biosynthetic process; monosaccharide biosynthetic process; pyridine-containing compound metabolic process; cellular m…	intracellular organelle; extracellular region part; vesicle; cytoplasm; intracellular part; cell; cytosol; extracellular region; intracellular membrane-bounded organelle; organelle; extracellular exosome; nucleus; intracellular; cell part; extracellular vesicle; membrane-bounded organelle; extracellular organelle; cytoplasmic part;	sedoheptulose-7-phosphate:D-glyceraldehyde-3-phosphate glyceronetransferase activity; catalytic activity; binding; transferase activity, transferring aldehyde or ketonic groups; carbohydrate binding; protein binding; monosaccharide binding; transferase activity; small molecule binding;	K00616	E2.2.1.2; transaldolase [EC:2.2.1.2]	hsa01100 Metabolic pathways - Homo sapiens (human); hsa00030 Pentose phosphate pathway - Homo sapiens (human); hsa01230 Biosynthesis of amino acids - Homo sapiens (human); hsa01200 Carbon metabolism - Homo sapiens (human);	IPR013785;	Aldolase-type TIM barrel;		G	KOG2772	Transaldolase
Q13557	337	T	Calcium/calmodulin-dependent protein kinase type II subunit delta	CAMK2D	0.489	0.00445	Down	Q1	0.945531	2.02e-14	101.66	KPDGVKES(0.631)T(0.205)ES(0.077)S(0.086)NT(0.056)T(0.946)IEDEDVK	4	-0.17183	cytoplasm	single organism signaling; cellular component biogenesis; regulation of cell death; regulation of biological quality; cell surface receptor signaling pathway; positive regulation of muscle hypertrophy; regulation of relaxation of cardiac muscle; negative regulation of sodium ion transport; negative regulation of sodium ion transmembrane transport; cellular response to cytokine stimulus; cellular …	membrane; endoplasmic reticulum; nuclear outer membrane-endoplasmic reticulum membrane network; cytoplasmic vesicle; organelle membrane; cell periphery; vesicle; cytoplasm; cytoplasmic vesicle part; intracellular part; sarcoplasm; cell; organelle part; sarcoplasmic reticulum membrane; membrane-enclosed lumen; nucleoplasm; intracellular organelle lumen; membrane part; intracellular; cell part; who…	ion channel inhibitor activity; nucleoside phosphate binding; phosphotransferase activity, alcohol group as acceptor; guanyl-nucleotide exchange factor activity; protein dimerization activity; ion channel regulator activity; protein binding; sodium channel regulator activity; calmodulin-dependent protein kinase activity; protein kinase activity; molecular function regulator; channel inhibitor act…	K04515	CAMK2; calcium/calmodulin-dependent protein kinase (CaM kinase) II [EC:2.7.11.17]	hsa04921 Oxytocin signaling pathway - Homo sapiens (human); hsa05152 Tuberculosis - Homo sapiens (human); hsa04728 Dopaminergic synapse - Homo sapiens (human); hsa04722 Neurotrophin signaling pathway - Homo sapiens (human); hsa05031 Amphetamine addiction - Homo sapiens (human); hsa04916 Melanogenesis - Homo sapiens (human); hsa04020 Calcium signaling pathway - Homo sapiens (human); hsa04024 cAMP …	IPR000719; IPR013543; IPR011009; IPR032710;	Protein kinase domain; Calcium/calmodulin-dependent protein kinase II, association-domain; Protein kinase-like domain; NTF2-like domain;	CAMK2-delta-MASH1 promoter-coactivator complex;	T	KOG0033	Ca2+/calmodulin-dependent protein kinase, EF-Hand protein superfamily
P55036	266	S	26S proteasome non-ATPase regulatory subunit 4	PSMD4	0.491	0.00573	Down	Q1	0.999906	0.000166	110.93	MTIS(1)QQEFGR	3	0.48072	cytoskeleton	single organism signaling; cellular component biogenesis; regulation of biological quality; positive regulation of cellular protein metabolic process; innate immune response activating cell surface receptor signaling pathway; cell surface receptor signaling pathway; posttranscriptional regulation of gene expression; positive regulation of ubiquitin-protein transferase activity; regulation of defe…	intracellular organelle; proteasome complex; proteasome regulatory particle; cytoplasm; intracellular organelle part; macromolecular complex; nuclear lumen; intracellular part; cytosol; cell; organelle part; proteasome regulatory particle, base subcomplex; endopeptidase complex; organelle; intracellular membrane-bounded organelle; membrane-enclosed lumen; catalytic complex; nucleoplasm; nucleus; …	organic cyclic compound binding; heterocyclic compound binding; RNA binding; polyubiquitin binding; identical protein binding; binding; nucleic acid binding; ubiquitin binding; protein binding; ubiquitin-like protein binding;	K03029	PSMD4; 26S proteasome regulatory subunit N10	hsa03050 Proteasome - Homo sapiens (human); hsa05169 Epstein-Barr virus infection - Homo sapiens (human);	IPR002035;	von Willebrand factor, type A;	PA700-20S-PA28 complex; PA700 complex; 26S proteasome;	O	KOG2884	26S proteasome regulatory complex, subunit RPN10/PSMD4
Q96D71	143	S	RalBP1-associated Eps domain-containing protein 1	REPS1	0.491	0.0111	Down	Q1	0.932583	1.09e-14	162.79	KGS(0.933)VS(0.067)HDTVQPR	3	-0.032949	nucleus	transport; cellular component organization; membrane organization; vesicle-mediated transport; receptor-mediated endocytosis; endocytosis; localization; cellular process; establishment of localization; cellular component organization or biogenesis;	membrane; cell periphery; cytoplasm; endomembrane system; intracellular part; cytosol; cell; plasma membrane; membrane part; cell part; intracellular; whole membrane; membrane region; clathrin-coated pit; cytoplasmic part;	binding; ion binding; cation binding; metal ion binding; protein binding; protein domain specific binding; calcium ion binding; SH3 domain binding;	K20068			IPR000261; IPR002048; IPR011992;	EH domain; EF-hand domain; EF-hand domain pair;		U	KOG1955	Ral-GTPase effector RALBP1
O00505	56	S	Importin subunit alpha-4	KPNA3	0.492	0.0128	Down	Q1	1	7.89e-06	85.013	NVPQEES(1)LEDS(1)DVDADFK	3	-0.89792	cytoplasm	entry into host; cellular component biogenesis; regulation of biological quality; NLS-bearing protein import into nucleus; multi-organism nuclear import; establishment of protein localization to organelle; protein import; single-organism process; multi-organism cellular localization; nuclear transport; multi-organism cellular process; modification of morphology or physiology of other organism; pr…	intracellular organelle; nuclear pore; nuclear envelope; cytoplasm; intracellular organelle part; organelle envelope; nuclear lumen; endomembrane system; macromolecular complex; intracellular part; cytosol; cell; organelle part; membrane-enclosed lumen; organelle; intracellular membrane-bounded organelle; nucleoplasm; nucleus; intracellular organelle lumen; cell part; intracellular; envelope; mem…	signal sequence binding; protein transporter activity; peptide binding; binding; nuclear localization sequence binding; substrate-specific transporter activity; protein C-terminus binding; protein binding; amide binding; transporter activity;				IPR002652; IPR011989; IPR016024;	Importin-alpha, importin-beta-binding domain; Armadillo-like helical; Armadillo-type fold;	CTCF-nucleophosmin-PARP-HIS-KPNA-LMNA-TOP complex; TNF-alpha/NF-kappa B signaling complex (CHUK, KPNA3, NFKB2, NFKBIB, REL, IKBKG, NFKB1, NFKBIE, RELB, NFKBIA, RELA, TNIP2);	U	KOG0166	Karyopherin (importin) alpha
Q8N6T3	189	T	ADP-ribosylation factor GTPase-activating protein 1	ARFGAP1	0.493	0.000192	Down	Q1	0.999997	0.000244	79.089	YVGFGNT(1)PPPQK	3	-0.056909	nucleus	single organism signaling; regulation of cellular process; regulation of vesicle-mediated transport; intracellular transport; cellular response to stress; response to endoplasmic reticulum stress; cellular response to topologically incorrect protein; cellular response to organic substance; single-organism process; Golgi vesicle transport; IRE1-mediated unfolded protein response; response to stimu…	intracellular organelle; cytoplasm; endomembrane system; intracellular part; cytosol; cell; asymmetric synapse; synapse; organelle; intracellular membrane-bounded organelle; postsynapse; cell part; intracellular; postsynaptic density; membrane-bounded organelle; Golgi apparatus; postsynaptic specialization; neuron to neuron synapse; cytoplasmic part; synapse part;	enzyme regulator activity; nucleoside-triphosphatase regulator activity; binding; GTPase regulator activity; ion binding; cation binding; metal ion binding; protein binding; molecular function regulator; enzyme activator activity; GTPase activator activity;	K12492	ARFGAP1; ADP-ribosylation factor GTPase-activating protein 1	hsa04144 Endocytosis - Homo sapiens (human);				TUZ	KOG0704	ADP-ribosylation factor GTPase activator
Q9P2B2	875	S	Prostaglandin F2 receptor negative regulator	PTGFRN	0.493	0.0083	Down	Q1	1	0.0548	53.968	LMS(1)MEMD	2	-0.82736	extracellular	cellular component organization; lipid particle organization; cellular process; organelle organization; cellular component organization or biogenesis;	intracellular organelle; membrane; nuclear outer membrane-endoplasmic reticulum membrane network; endoplasmic reticulum; cell periphery; intracellular organelle part; cytoplasm; intrinsic component of membrane; endomembrane system; intracellular part; cell; integral component of membrane; organelle part; plasma membrane; intracellular membrane-bounded organelle; organelle; endoplasmic reticulum p…	protein binding; binding;	K06729			IPR007110; IPR013783; IPR003599; IPR013106;	Immunoglobulin-like domain; Immunoglobulin-like fold; Immunoglobulin subtype; Immunoglobulin V-set domain;
Q03252	37	S	Lamin-B2	LMNB2	0.494	0.00781	Down	Q1	0.997688	3.52e-14	160.46	AGGPATPLS(0.998)PT(0.002)R	2	0.47372	nucleus		membrane; organelle membrane; supramolecular fiber; intracellular part; supramolecular complex; cell; organelle part; non-membrane-bounded organelle; nuclear lamina; membrane-enclosed lumen; cytoskeleton; nuclear membrane; intracellular organelle lumen; intracellular; cell part; organelle inner membrane; membrane-bounded organelle; nuclear inner membrane; organelle lumen; intracellular organelle;…	structural molecule activity;	K07611	LMNB; lamin B	hsa04210 Apoptosis - Homo sapiens (human);	IPR001322;	Lamin Tail Domain;		DY	KOG0977	Nuclear envelope protein lamin, intermediate filament superfamily
Q01082	257	S	Spectrin beta chain, non-erythrocytic 1	SPTBN1	0.496	0.038	Down	Q1	1	3.5e-05	85.087	LLDPEDIS(1)VDHPDEK	3	-0.48313	cytoplasm	cellular component biogenesis; single organism signaling; regulation of biological quality; cell surface receptor signaling pathway; cellular component morphogenesis; establishment of protein localization to plasma membrane; nuclear transport; regulation of actin filament length; cellular metabolic process; protein transport; response to external stimulus; regulation of plasma membrane organizati…	membrane; extracellular region part; cytoplasmic region; cytoplasm; macromolecular complex; supramolecular complex; cell; organelle part; neuron projection membrane; non-membrane-bounded organelle; extracellular exosome; plasma membrane region; leading edge membrane; intracellular; axolemma; postsynaptic density; neuron projection; M band; membrane-bounded organelle; neuron part; organelle lumen;…	RNA binding; guanyl-nucleotide exchange factor activity; macromolecular complex binding; ion binding; protein binding; molecular function regulator; calmodulin binding; ankyrin binding; heterocyclic compound binding; organic cyclic compound binding; cell adhesion molecule binding; cytoskeletal protein binding; structural constituent of cytoskeleton; binding; phospholipid binding; cadherin binding…	K06115			IPR001605; IPR011993; IPR001715; IPR001849;	Pleckstrin homology domain, spectrin-type; PH domain-like; Calponin homology domain; Pleckstrin homology domain;		Z	KOG0517	Beta-spectrin
Q12888	366	S	Tumor suppressor p53-binding protein 1	TP53BP1	0.496	0.0478	Down	Q1	0.999988	2.27e-20	127.15	SLVQDSLSTNSSDLVAPS(1)PDAFR	3	0.058652	nucleus	nucleic acid-templated transcription; positive regulation of biosynthetic process; biosynthetic process; cellular metabolic process; regulation of RNA biosynthetic process; metabolic process; DNA damage checkpoint; positive regulation of metabolic process; positive regulation of nitrogen compound metabolic process; positive regulation of molecular function; cell cycle checkpoint; response to radi…	cytoplasm; macromolecular complex; intracellular part; nuclear body; cell; condensed chromosome kinetochore; organelle part; non-membrane-bounded organelle; chromosomal part; condensed chromosome; membrane-enclosed lumen; nucleoplasm; intracellular organelle lumen; intracellular; cell part; chromosome; membrane-bounded organelle; kinetochore; nucleoplasm part; organelle lumen; intracellular organ…	histone binding; DNA binding; methylated histone binding; protein binding; transcription cofactor activity; RNA polymerase II activating transcription factor binding; activating transcription factor binding; heterocyclic compound binding; organic cyclic compound binding; p53 binding; transcription factor activity, RNA polymerase II transcription factor binding; RNA polymerase II transcription cof…	K20915	TP53BP1; tumor suppressor p53-binding protein 1	hsa04621 NOD-like receptor signaling pathway - Homo sapiens (human);	IPR015125; IPR014722; IPR001357;	Tumour suppressor p53-binding protein-1 Tudor domain; Ribosomal protein L2 domain 2; BRCT domain;	PTIP-DNA damage response complex; MDC1-H2AFX-TP53BP1 complex; 53BP1-containing complex; MDC1-p53BP1-SMC1 complex;	L	KOG3548	DNA damage checkpoint protein RHP9/CRB2/53BP1
Q9NRY4	1173	T	Rho GTPase-activating protein 35	ARHGAP35	0.496	0.0496	Down	Q1	0.949292	4.38e-07	104.38	T(0.949)S(0.05)FS(0.001)VGS(0.999)DDELGPIR	2	0.7959	nucleus	single organism signaling; regulation of biological quality; gland development; regulation of cell projection assembly; nucleic acid-templated transcription; tube formation; chordate embryonic development; brain development; cellular component morphogenesis; regulation of actin filament length; cellular metabolic process; response to external stimulus; metabolic process; actin cytoskeleton organi…	cilium; intracellular organelle; membrane; cell projection; intracellular non-membrane-bounded organelle; cell periphery; cytoskeletal part; intracellular organelle part; cytoplasm; ciliary basal body; intracellular part; cytosol; cell projection part; cell; actin cytoskeleton; organelle part; plasma membrane; non-membrane-bounded organelle; intracellular membrane-bounded organelle; organelle; cy…	RNA polymerase II transcription factor activity, sequence-specific DNA binding; nucleoside phosphate binding; nucleoside-triphosphatase regulator activity; double-stranded DNA binding; GTPase regulator activity; molecular function regulator; transcription factor activity, sequence-specific DNA binding; heterocyclic compound binding; regulatory region DNA binding; organic cyclic compound binding; …	K05732	ARHGAP35; glucocorticoid receptor DNA-binding factor 1	hsa04611 Platelet activation - Homo sapiens (human); hsa04670 Leukocyte transendothelial migration - Homo sapiens (human); hsa04510 Focal adhesion - Homo sapiens (human); hsa04810 Regulation of actin cytoskeleton - Homo sapiens (human);	IPR002713; IPR027417; IPR008936; IPR000198; IPR032835;	FF domain; P-loop containing nucleoside triphosphate hydrolase; Rho GTPase activation protein; Rho GTPase-activating protein domain; Rho GTPase-activating protein, FF domain;		T	KOG4271	Rho-GTPase activating protein
Q9NRY4	1179	S	Rho GTPase-activating protein 35	ARHGAP35	0.496	0.0496	Down	Q1	0.99907	4.38e-07	104.38	T(0.949)S(0.05)FS(0.001)VGS(0.999)DDELGPIR	2	0.7959	nucleus	single organism signaling; regulation of biological quality; gland development; regulation of cell projection assembly; nucleic acid-templated transcription; tube formation; chordate embryonic development; brain development; cellular component morphogenesis; regulation of actin filament length; cellular metabolic process; response to external stimulus; metabolic process; actin cytoskeleton organi…	cilium; intracellular organelle; membrane; cell projection; intracellular non-membrane-bounded organelle; cell periphery; cytoskeletal part; intracellular organelle part; cytoplasm; ciliary basal body; intracellular part; cytosol; cell projection part; cell; actin cytoskeleton; organelle part; plasma membrane; non-membrane-bounded organelle; intracellular membrane-bounded organelle; organelle; cy…	RNA polymerase II transcription factor activity, sequence-specific DNA binding; nucleoside phosphate binding; nucleoside-triphosphatase regulator activity; double-stranded DNA binding; GTPase regulator activity; molecular function regulator; transcription factor activity, sequence-specific DNA binding; heterocyclic compound binding; regulatory region DNA binding; organic cyclic compound binding; …	K05732	ARHGAP35; glucocorticoid receptor DNA-binding factor 1	hsa04611 Platelet activation - Homo sapiens (human); hsa04670 Leukocyte transendothelial migration - Homo sapiens (human); hsa04510 Focal adhesion - Homo sapiens (human); hsa04810 Regulation of actin cytoskeleton - Homo sapiens (human);	IPR002713; IPR027417; IPR008936; IPR000198; IPR032835;	FF domain; P-loop containing nucleoside triphosphate hydrolase; Rho GTPase activation protein; Rho GTPase-activating protein domain; Rho GTPase-activating protein, FF domain;		T	KOG4271	Rho-GTPase activating protein
P05783	15	S	Keratin, type I cytoskeletal 18	KRT18	0.497	0.045	Down	Q1	0.998974	5.1e-21	176.15	S(0.999)LGS(0.001)VQAPSYGAR	2	1.0963	mitochondria	single organism signaling; regulation of cell death; endomembrane system organization; keratinization; cell surface receptor signaling pathway; cellular developmental process; establishment of protein localization to plasma membrane; single-organism process; multi-organism cellular process; cellular response to cytokine stimulus; protein transport; establishment of localization; biological adhesi…	extracellular region part; microtubule organizing center part; cell junction; cell periphery; vesicle; cytoplasm; supramolecular fiber; intracellular part; cell-cell adherens junction; supramolecular complex; cell-cell junction; cell; organelle part; non-membrane-bounded organelle; extracellular exosome; membrane-enclosed lumen; cytoskeleton; microtubule organizing center; intracellular organelle…	organic cyclic compound binding; heterocyclic compound binding; cadherin binding involved in cell-cell adhesion; cell adhesion molecule binding; RNA binding; protein binding involved in cell adhesion; binding; cadherin binding; nucleic acid binding; scaffold protein binding; protein binding; protein binding involved in cell-cell adhesion; structural molecule activity;	K07604	KRT1; type I keratin, acidic	hsa05150 Staphylococcus aureus infection - Homo sapiens (human); hsa05130 Pathogenic Escherichia coli infection - Homo sapiens (human);				R	KOG0508	Ankyrin repeat protein
P60174	249	S	Triosephosphate isomerase	TPI1	0.498	0.000116	Down	Q1	0.986985	1.27e-10	141.55	IIYGGS(0.987)VT(0.013)GATCK	3	-4.2272	cytoplasm	monosaccharide catabolic process; ATP generation from ADP; NADP metabolic process; nucleoside metabolic process; purine nucleoside metabolic process; nucleoside diphosphate phosphorylation; ADP metabolic process; pyridine nucleotide metabolic process; hexose biosynthetic process; glycolytic process; purine ribonucleoside monophosphate metabolic process; alcohol metabolic process; nucleotide metab…	intracellular organelle; extracellular space; extracellular region part; vesicle; cytoplasm; intracellular part; cell; cytosol; extracellular region; intracellular membrane-bounded organelle; organelle; extracellular exosome; nucleus; intracellular; cell part; extracellular vesicle; membrane-bounded organelle; extracellular organelle; cytoplasmic part;	isomerase activity; triose-phosphate isomerase activity; ubiquitin protein ligase binding; catalytic activity; binding; protein binding; intramolecular oxidoreductase activity; ubiquitin-like protein ligase binding; intramolecular oxidoreductase activity, interconverting aldoses and ketoses; enzyme binding;	K01803	TPI; triosephosphate isomerase (TIM) [EC:5.3.1.1]	hsa00051 Fructose and mannose metabolism - Homo sapiens (human); hsa00562 Inositol phosphate metabolism - Homo sapiens (human); hsa01100 Metabolic pathways - Homo sapiens (human); hsa00010 Glycolysis / Gluconeogenesis - Homo sapiens (human); hsa01230 Biosynthesis of amino acids - Homo sapiens (human); hsa01200 Carbon metabolism - Homo sapiens (human);	IPR013785;	Aldolase-type TIM barrel;		G	KOG1643	Triosephosphate isomerase
Q92614	72	S	Unconventional myosin-XVIIIa	MYO18A	0.498	0.0212	Down	Q1	0.924969	5.34e-12	117.82	VAS(0.925)GS(0.075)DLHLTDIDSDSNR	3	0.090297	nucleus	regulation of vesicle-mediated transport; regulation of leukocyte activation; regulation of cell death; endomembrane system organization; localization of cell; regulation of macrophage activation; regulation of secretion; single-organism process; cellular metabolic process; establishment of localization; positive regulation of cellular component organization; metabolic process; actin cytoskeleton…	membrane; organelle membrane; cytoplasm; macromolecular complex; intracellular part; cell; organelle part; non-membrane-bounded organelle; cytoskeleton; intracellular; cell part; Golgi subcompartment; Golgi apparatus part; myosin complex; membrane-bounded organelle; actomyosin; intracellular organelle; bounding membrane of organelle; intracellular non-membrane-bounded organelle; cytoskeletal part…	actin filament binding; motor activity; nucleoside phosphate binding; hydrolase activity, acting on acid anhydrides; hydrolase activity; protein binding; ATPase activity; heterocyclic compound binding; organic cyclic compound binding; pyrophosphatase activity; cytoskeletal protein binding; catalytic activity; ribonucleotide binding; binding; purine ribonucleoside binding; ADP binding; anion bindi…	K10362			IPR002928; IPR001478; IPR027417; IPR001609; IPR020587; IPR027401;	Myosin tail; PDZ domain; P-loop containing nucleoside triphosphate hydrolase; Myosin head, motor domain; DNA recombination and repair protein RecA, monomer-monomer interface; Myosin-like IQ motif-containing domain;		Z	KOG0161	Myosin class II heavy chain
Q96D71	145	S	RalBP1-associated Eps domain-containing protein 1	REPS1	0.498	0.00497	Down	Q1	0.761814	8.64e-07	116.86	KGS(0.236)VS(0.762)HDT(0.002)VQPR	3	-0.078115	nucleus	transport; cellular component organization; membrane organization; vesicle-mediated transport; receptor-mediated endocytosis; endocytosis; localization; cellular process; establishment of localization; cellular component organization or biogenesis;	membrane; cell periphery; cytoplasm; endomembrane system; intracellular part; cytosol; cell; plasma membrane; membrane part; cell part; intracellular; whole membrane; membrane region; clathrin-coated pit; cytoplasmic part;	binding; ion binding; cation binding; metal ion binding; protein binding; protein domain specific binding; calcium ion binding; SH3 domain binding;	K20068			IPR000261; IPR002048; IPR011992;	EH domain; EF-hand domain; EF-hand domain pair;		U	KOG1955	Ral-GTPase effector RALBP1
P42167	67	S	Lamina-associated polypeptide 2, isoforms beta/gamma	TMPO	0.5	0.011	Down	Q2	1	1.64e-60	186.33	GPPDFS(1)S(1)DEEREPT(0.999)PVLGS(0.001)GAAAAGR	3	-0.94604	cytoplasm		intracellular organelle; membrane; organelle membrane; nuclear envelope; cytoplasm; intracellular organelle part; organelle envelope; intrinsic component of membrane; endomembrane system; intracellular part; cell; integral component of membrane; organelle part; organelle; intracellular membrane-bounded organelle; nuclear membrane; nucleus; membrane part; cell part; intracellular; envelope; organe…	organic cyclic compound binding; heterocyclic compound binding; DNA binding; lamin binding; binding; nucleic acid binding; protein binding;				IPR013146; IPR003887; IPR011015;	LEM-like domain; LEM domain; LEM/LEM-like domain;
Q9C0C2	836	S	182 kDa tankyrase-1-binding protein	TNKS1BP1	0.5	0.00835	Down	Q2	1	9.87e-43	214.54	S(1)QEADVQDWEFR	2	2.006	nucleus	single organism signaling; negative regulation of cell cycle G1/S phase transition; regulation of biological quality; positive regulation of cellular protein metabolic process; regulation of cell cycle process; cellular metabolic process; signal transduction involved in mitotic G1 DNA damage checkpoint; signal transduction involved in mitotic DNA integrity checkpoint; metabolic process; regulatio…	cell junction; cytoplasm; macromolecular complex; intracellular part; cell-cell adherens junction; cell; cell-cell junction; organelle part; heterochromatin; chromosomal part; non-membrane-bounded organelle; cytoskeleton; membrane-enclosed lumen; intracellular organelle lumen; nuclear chromosome part; intracellular; cell part; chromosome; nuclear chromatin; adherens junction; CCR4-NOT complex; me…	cell adhesion molecule binding; binding; cadherin binding; macromolecular complex binding; protein binding; protein domain specific binding; ankyrin repeat binding; enzyme binding;				IPR032764;	Tankyrase 1-binding protein, C-terminal;
P02751	2384	S	Fibronectin	FN1	0.502	0.0297	Down	Q2	1	2.51e-19	115.05	TNTNVNCPIECFMPLDVQADREDS(1)RE	4	-1.2923	extracellular	cellular component biogenesis; positive regulation of cell migration; regulation of biological quality; positive regulation of cellular protein metabolic process; cellular component morphogenesis; cellular metabolic process; positive regulation of growth; regulation of cell growth; endoderm development; regulation of fibroblast proliferation; biological adhesion; angiogenesis; substrate adhesion-…	secretory granule lumen; membrane; extracellular space; extracellular region part; apical plasma membrane; cytoplasmic vesicle; cell periphery; cytoplasm; vesicle; cytoplasmic vesicle part; macromolecular complex; intracellular part; cell; extracellular matrix component; organelle part; basement membrane; membrane-enclosed lumen; basal lamina; extracellular exosome; vesicle lumen; intracellular o…	receptor binding; ion binding; macromolecular complex binding; peptidase regulator activity; peptidase activator activity; protein binding; integrin binding; heparin binding; molecular function regulator; sulfur compound binding; protease binding; cell adhesion molecule binding; carbohydrate derivative binding; identical protein binding; enzyme regulator activity; binding; collagen binding; anion…	K05717	FN1; fibronectin 1	hsa05100 Bacterial invasion of epithelial cells - Homo sapiens (human); hsa05200 Pathways in cancer - Homo sapiens (human); hsa04933 AGE-RAGE signaling pathway in diabetic complications - Homo sapiens (human); hsa05146 Amoebiasis - Homo sapiens (human); hsa04810 Regulation of actin cytoskeleton - Homo sapiens (human); hsa04151 PI3K-Akt signaling pathway - Homo sapiens (human); hsa05222 Small cell…	IPR000083; IPR013783; IPR013806; IPR003961; IPR000562;	Fibronectin, type I; Immunoglobulin-like fold; Kringle-like fold; Fibronectin type III; Fibronectin, type II, collagen-binding;	ITGA5-ITGB1-FN1-TGM2 complex; FN1-TGM2 complex; ITGA5-ITGB1-FN-1-NOV complex; ITGA2B-ITGB3-FN1-TGM2 complex; ITGB6-FYN-FN1 complex;	TW	KOG1225	Teneurin-1 and related extracellular matrix proteins, contain EGF-like repeats
P21439	667	T	Phosphatidylcholine translocator ABCB4	ABCB4	0.502	0.0019	Down	Q2	1	0.00414	82.417	LFRHS(1)T(1)QK	3	-0.042631	plasma membrane	regulation of cell death; hormone transport; regulation of biological quality; gland development; digestion; regulation of sterol transport; reproductive process; brain development; cellular response to corticosteroid stimulus; regulation of membrane lipid distribution; positive regulation of phospholipid transport; response to vitamin A; response to biotic stimulus; response to flavonoid; respon…	membrane; cluster of actin-based cell projections; extracellular region part; membrane microdomain; cytoplasm; integral component of plasma membrane; cell; organelle part; non-membrane-bounded organelle; extracellular exosome; nucleoplasm; plasma membrane region; focal adhesion; clathrin-coated vesicle; intracellular; membrane region; cell-substrate junction; membrane-bounded organelle; apical pa…	nucleoside phosphate binding; primary active transmembrane transporter activity; xenobiotic transporter activity; lipid transporter activity; substrate-specific transporter activity; hydrolase activity, acting on acid anhydrides; protein binding; hydrolase activity; ATPase activity; heterocyclic compound binding; organic cyclic compound binding; pyrophosphatase activity; ribonucleotide binding; c…	K05659	ABCB4; ATP-binding cassette, subfamily B (MDR/TAP), member 4 [EC:3.6.3.44]	hsa04976 Bile secretion - Homo sapiens (human); hsa02010 ABC transporters - Homo sapiens (human);	IPR003593; IPR003439; IPR011527; IPR027417;	AAA+ ATPase domain; ABC transporter-like; ABC transporter type 1, transmembrane domain; P-loop containing nucleoside triphosphate hydrolase;		Q	KOG0055	Multidrug/pheromone exporter, ABC superfamily
P18615	181	S	Negative elongation factor E	NELFE	0.503	0.0374	Down	Q2	0.802982	1.99e-05	117.93	SGAHS(0.022)S(0.175)AS(0.803)PPR	3	0.29161	nucleus	positive regulation of cellular protein metabolic process; negative regulation of transcription elongation from RNA polymerase II promoter; nucleic acid-templated transcription; positive regulation of biosynthetic process; negative regulation of mRNA processing; DNA-templated transcription, elongation; cellular metabolic process; positive regulation of chromatin organization; metabolic process; r…	membrane; intracellular organelle; cell periphery; intracellular organelle part; macromolecular complex; nuclear lumen; intracellular part; nuclear body; cell; organelle part; plasma membrane; membrane-enclosed lumen; organelle; intracellular membrane-bounded organelle; nucleus; nucleoplasm; intracellular organelle lumen; cell part; intracellular; NELF complex; transcription elongation factor com…	organic cyclic compound binding; heterocyclic compound binding; RNA binding; nucleoside phosphate binding; binding; nucleic acid binding; protein binding; chromatin binding; nucleotide binding; small molecule binding;	K15182			IPR000504; IPR012677;	RNA recognition motif domain; Nucleotide-binding alpha-beta plait domain;	NELF complex (Negative elongation factor complex);
Q9H425	289	S	Uncharacterized protein C1orf198	C1orf198	0.503	0.0377	Down	Q2	1	0.00156	88.181	LPS(1)PDVR	2	0.31855	mitochondria		cell part; intracellular; cytoplasm; intracellular part; cytosol; cell; cytoplasmic part;					IPR031600;	Domain of unknown function DUF4706;
Q8IXT5	575	S	RNA-binding protein 12B	RBM12B	0.505	0.000118	Down	Q2	1	2.04e-07	106.31	FPPEDFRHS(1)PEDFR	3	-0.40818	extracellular			organic cyclic compound binding; heterocyclic compound binding; RNA binding; nucleoside phosphate binding; binding; nucleic acid binding; protein binding; nucleotide binding; small molecule binding;				IPR000504; IPR012677;	RNA recognition motif domain; Nucleotide-binding alpha-beta plait domain;		R	KOG4307	RNA binding protein RBM12/SWAN
Q8NF91	1993	S	Nesprin-1	SYNE1	0.505	0.0052	Down	Q2	0.996458	0.012	53.448	S(0.996)IEDIEERT(0.004)DK	2	0.48867	nucleus	reproduction; nucleus organization; cellular component organization; regulation of biological quality; endomembrane system organization; reproductive process; cellular developmental process; nuclear matrix organization; single-organism process; maintenance of protein location in nucleus; maintenance of protein localization in organelle; cell differentiation; single-organism localization; single o…	membrane; outer membrane; organelle membrane; cytoplasm; macromolecular complex; supramolecular complex; cell; organelle part; nuclear outer membrane; non-membrane-bounded organelle; nucleoplasm; nuclear membrane; plasma membrane region; intracellular; microtubule organizing center attachment site; synaptic membrane; membrane-bounded organelle; organelle lumen; LINC complex; organelle envelope; n…	actin filament binding; RNA binding; lamin binding; protein dimerization activity; macromolecular complex binding; protein binding; heterocyclic compound binding; organic cyclic compound binding; cytoskeletal protein binding; identical protein binding; binding; protein homodimerization activity; nucleic acid binding; actin binding; enzyme binding; protein complex binding;	K19326			IPR012315; IPR001715;	KASH domain; Calponin homology domain;		Z	KOG0516	Dystonin, GAS (Growth-arrest-specific protein), and related proteins
Q01433	188	T	AMP deaminase 2	AMPD2	0.506	0.00401	Down	Q2	0.97043	5.8e-31	198.29	T(0.97)DS(0.029)DSDLQLYK	2	0.31435	mitochondria	regulation of biological quality; nucleoside metabolic process; purine nucleoside metabolic process; purine ribonucleoside monophosphate metabolic process; cellular developmental process; nucleotide metabolic process; single-organism process; biosynthetic process; ribonucleoside monophosphate biosynthetic process; IMP metabolic process; cellular metabolic process; multicellular organismal homeost…	cell part; intracellular; cytoplasm; intracellular part; cytosol; cell; cytoplasmic part;	adenosine-phosphate deaminase activity; hydrolase activity, acting on carbon-nitrogen (but not peptide) bonds, in cyclic amidines; catalytic activity; binding; ion binding; deaminase activity; cation binding; metal ion binding; protein binding; hydrolase activity; AMP deaminase activity; hydrolase activity, acting on carbon-nitrogen (but not peptide) bonds;	K01490	AMPD; AMP deaminase [EC:3.5.4.6]	hsa00230 Purine metabolism - Homo sapiens (human); hsa01100 Metabolic pathways - Homo sapiens (human);	IPR001365; IPR032466;	Adenosine/AMP deaminase domain; Metal-dependent hydrolase;		F	KOG1096	Adenosine monophosphate deaminase
Q92887	908	S	Canalicular multispecific organic anion transporter 1	ABCC2	0.506	0.0487	Down	Q2	1	0.0267	54.066	RENS(1)FRR	3	-1.2311	plasma membrane	hormone transport; modified amino acid transport; regulation of biological quality; reproductive process; cellular response to corticosteroid stimulus; cellular monovalent inorganic anion homeostasis; response to interleukin-1; response to arsenic-containing substance; cellular metabolic process; cellular response to cytokine stimulus; response to biotic stimulus; transition metal ion transport; …	membrane; cell projection; cluster of actin-based cell projections; intrinsic component of plasma membrane; brush border; apical plasma membrane; brush border membrane; intercellular canaliculus; cell junction; cell periphery; intrinsic component of membrane; integral component of plasma membrane; cell-cell junction; cell projection part; cell; integral component of membrane; plasma membrane; pla…	ATPase coupled ion transmembrane transporter activity; nucleoside phosphate binding; bilirubin transmembrane transporter activity; primary active transmembrane transporter activity; hydrolase activity, acting on acid anhydrides; substrate-specific transporter activity; hydrolase activity; protein binding; ATPase activity; substrate-specific transmembrane transporter activity; heterocyclic compoun…	K05666	ABCC2; ATP-binding cassette, subfamily C (CFTR/MRP), member 2	hsa01524 Platinum drug resistance - Homo sapiens (human); hsa01523 Antifolate resistance - Homo sapiens (human); hsa04976 Bile secretion - Homo sapiens (human); hsa02010 ABC transporters - Homo sapiens (human);	IPR003593; IPR003439; IPR027417; IPR011527;	AAA+ ATPase domain; ABC transporter-like; P-loop containing nucleoside triphosphate hydrolase; ABC transporter type 1, transmembrane domain;		Q	KOG0054	Multidrug resistance-associated protein/mitoxantrone resistance protein, ABC superfamily
P20700	534	S	Lamin-B1	LMNB1	0.508	0.00341	Down	Q2	1	1.32e-09	122.49	VILKNS(1)QGEEVAQR	3	-0.29486	nucleus		membrane; organelle membrane; supramolecular fiber; intracellular part; supramolecular complex; cell; organelle part; non-membrane-bounded organelle; nuclear lamina; cytoskeleton; membrane-enclosed lumen; nucleoplasm; nuclear membrane; intracellular organelle lumen; cell part; intracellular; organelle inner membrane; membrane-bounded organelle; nuclear inner membrane; organelle lumen; intracellul…	protein binding; phospholipase binding; structural molecule activity; binding; enzyme binding;	K07611	LMNB; lamin B	hsa04210 Apoptosis - Homo sapiens (human);	IPR001322;	Lamin Tail Domain;	Emerin complex 32; Emerin architectural complex; Emerin complex 52; Emerin complex 25; Emerin complex 24;	DY	KOG0977	Nuclear envelope protein lamin, intermediate filament superfamily
Q7KZF4	781	S	Staphylococcal nuclease domain-containing protein 1	SND1	0.508	0.0364	Down	Q2	0.999769	7.77e-06	130.19	LGTLS(1)PAFSTR	2	0.45395	cytoplasm	osteoblast differentiation; nucleic acid-templated transcription; cellular developmental process; single-organism process; biosynthetic process; multi-organism cellular process; cellular metabolic process; regulation of RNA biosynthetic process; metabolic process; organic cyclic compound catabolic process; macromolecule metabolic process; interspecies interaction between organisms; developmental …	intracellular vesicle; intracellular organelle; membrane; extracellular region part; cytoplasmic vesicle; melanosome; cytoplasm; vesicle; macromolecular complex; dense body; intracellular part; cytosol; cell; extracellular region; mitochondrion; pigment granule; extracellular exosome; intracellular membrane-bounded organelle; organelle; nucleus; intracellular; cell part; extracellular vesicle; RN…	RNA binding; hydrolase activity; protein binding; transcription cofactor activity; heterocyclic compound binding; organic cyclic compound binding; cell adhesion molecule binding; catalytic activity; binding; nucleic acid binding; cadherin binding; hydrolase activity, acting on ester bonds; nuclease activity; transcription factor activity, transcription factor binding; transcription factor activit…	K15979	SND1; staphylococcal nuclease domain-containing protein 1	hsa05169 Epstein-Barr virus infection - Homo sapiens (human); hsa05203 Viral carcinogenesis - Homo sapiens (human);	IPR016071; IPR002999;	Staphylococcal nuclease (SNase-like), OB-fold; Tudor domain;	STAT6-p100-RHA complex;	K	KOG2039	Transcriptional coactivator p100
Q8NC56	134	S	LEM domain-containing protein 2	LEMD2	0.509	0.00682	Down	Q2	1	0.000154	75.064	RAS(1)VRGS(1)S(1)EEDEDAR	3	0.10902	plasma membrane	regulation of protein kinase B signaling; reproductive process; chromosome attachment to the nuclear envelope; heart development; single organism reproductive process; nervous system development; regulation of phosphorylation; chromosome segregation; regulation of phosphorus metabolic process; regulation of primary metabolic process; muscle tissue development; meiotic telomere clustering; single-…	intracellular organelle; membrane; organelle membrane; nuclear envelope; intracellular organelle part; organelle envelope; intrinsic component of membrane; endomembrane system; intracellular part; cell; integral component of membrane; organelle part; organelle; intracellular membrane-bounded organelle; nuclear membrane; nucleus; intrinsic component of nuclear inner membrane; integral component of…	organic cyclic compound binding; heterocyclic compound binding; DNA binding; chromatin binding; chromatin DNA binding; binding; nucleic acid binding;				IPR011015; IPR003887; IPR018996;	LEM/LEM-like domain; LEM domain; Inner nuclear membrane protein MAN1;
Q8NC56	139	S	LEM domain-containing protein 2	LEMD2	0.51	8.99e-05	Down	Q2	1	1.13e-18	161.86	RAS(1)VRGS(1)S(1)EEDEDAR	3	0.10902	plasma membrane	regulation of protein kinase B signaling; reproductive process; chromosome attachment to the nuclear envelope; heart development; single organism reproductive process; nervous system development; regulation of phosphorylation; chromosome segregation; regulation of phosphorus metabolic process; regulation of primary metabolic process; muscle tissue development; meiotic telomere clustering; single-…	intracellular organelle; membrane; organelle membrane; nuclear envelope; intracellular organelle part; organelle envelope; intrinsic component of membrane; endomembrane system; intracellular part; cell; integral component of membrane; organelle part; organelle; intracellular membrane-bounded organelle; nuclear membrane; nucleus; intrinsic component of nuclear inner membrane; integral component of…	organic cyclic compound binding; heterocyclic compound binding; DNA binding; chromatin binding; chromatin DNA binding; binding; nucleic acid binding;				IPR011015; IPR003887; IPR018996;	LEM/LEM-like domain; LEM domain; Inner nuclear membrane protein MAN1;
Q9HBL0	1381	S	Tensin-1	TNS1	0.511	0.0437	Down	Q2	0.915127	0.000115	97.904	QGS(0.915)PT(0.085)PALPEKR	4	0.28928	nucleus	cellular component biogenesis; cell migration; cell-substrate junction assembly; cellular component organization; cell junction assembly; localization of cell; single-organism cellular process; single-organism process; cell motility; cell junction organization; cellular component assembly; ameboidal-type cell migration; fibroblast migration; movement of cell or subcellular component; locomotion; …	intracellular organelle; intracellular non-membrane-bounded organelle; cell junction; cytoplasm; anchoring junction; intracellular part; cell; non-membrane-bounded organelle; organelle; cytoskeleton; focal adhesion; intracellular; cell part; adherens junction; cell surface; cell-substrate junction; cell-substrate adherens junction;	actin binding; organic cyclic compound binding; heterocyclic compound binding; RNA binding; protein binding; cytoskeletal protein binding; binding; nucleic acid binding;	K18080			IPR013625; IPR029023; IPR033929; IPR003595; IPR006020; IPR029021; IPR000980; IPR011993; IPR014020; IPR000008;	Tensin/EPS8 phosphotyrosine-binding domain; Tensin phosphatase, lipid phosphatase domain; Tensin, phosphotyrosine-binding domain; Protein-tyrosine phosphatase, catalytic; PTB/PI domain; Protein-tyrosine phosphatase-like; SH2 domain; PH domain-like; Tensin phosphatase, C2 domain; C2 domain;		TR	KOG2283	Clathrin coat dissociation kinase GAK/PTEN/Auxilin and related tyrosine phosphatases
O15523	592	S	ATP-dependent RNA helicase DDX3Y	DDX3Y	0.513	0.00375	Down	Q2	1	5.09e-05	101.2	FS(1)GGFGAR	2	-0.81339	nucleus	peptide metabolic process; cellular aromatic compound metabolic process; regulation of macromolecule metabolic process; cellular protein metabolic process; biosynthetic process; organonitrogen compound biosynthetic process; cellular metabolic process; organic substance metabolic process; metabolic process; heterocycle metabolic process; nucleobase-containing compound metabolic process; translatio…	intracellular organelle; membrane; intracellular non-membrane-bounded organelle; cytoplasm; macromolecular complex; intracellular part; cell; cytosol; cytoplasmic ribonucleoprotein granule; non-membrane-bounded organelle; intracellular membrane-bounded organelle; organelle; nucleus; intracellular; cell part; ribonucleoprotein granule; ribonucleoprotein complex; membrane-bounded organelle; intrace…	nucleoside phosphate binding; ATP-dependent helicase activity; hydrolase activity, acting on acid anhydrides; hydrolase activity; ATPase activity; heterocyclic compound binding; organic cyclic compound binding; pyrophosphatase activity; catalytic activity; ribonucleotide binding; binding; purine ribonucleoside binding; ATP-dependent RNA helicase activity; anion binding; adenyl ribonucleotide bind…	K17642			IPR011545; IPR014014; IPR027417; IPR014001; IPR001650;	DEAD/DEAH box helicase domain; RNA helicase, DEAD-box type, Q motif; P-loop containing nucleoside triphosphate hydrolase; Helicase superfamily 1/2, ATP-binding domain; Helicase, C-terminal;		A	KOG0335	ATP-dependent RNA helicase
Q15154	537	S	Pericentriolar material 1 protein	PCM1	0.513	0.0438	Down	Q2	0.999859	8.23e-28	142.22	KDEETEESEYDS(1)EHENSEPVTNIR	4	-0.74457	nucleus	protein transport along microtubule; cellular component biogenesis; microtubule anchoring; brain development; nucleus localization; protein localization to microtubule organizing center; cilium assembly; protein transport; cilium organization; behavior; regulation of localization; cell cycle phase transition; protein localization to organelle; protein localization; single-organism transport; nerv…	membrane; microtubule organizing center part; organelle membrane; ciliary transition zone; cytoplasm; macromolecular complex; intracellular part; pericentriolar material; cell; organelle part; non-membrane-bounded organelle; cytoskeleton; nuclear membrane; microtubule organizing center; microtubule cytoskeleton; ciliary part; cell part; intracellular; membrane-bounded organelle; apical part of ce…	protein binding; identical protein binding; binding;	K16537			IPR031446;	Pericentriolar material 1 protein, C-terminal;
Q6IQ23	986	S	Pleckstrin homology domain-containing family A member 7	PLEKHA7	0.513	0.0464	Down	Q2	0.98046	2.32e-15	86.722	S(0.019)YVS(0.98)EPELATLSGDMAQPSLGLVGPESR	3	0.52028	nucleus	zonula adherens maintenance; epithelial cell-cell adhesion; cellular component organization; biological adhesion; cellular component maintenance; single organismal cell-cell adhesion; cell junction organization; cell-cell junction maintenance; single-organism cellular process; cell-cell junction organization; single organism cell adhesion; cell-cell adhesion; cell adhesion; single-organism proces…	extracellular region part; cell junction; cytoplasm; vesicle; intracellular part; cell-cell adherens junction; cell-cell junction; cell; organelle part; non-membrane-bounded organelle; extracellular exosome; cytoskeleton; microtubule organizing center; microtubule cytoskeleton; intracellular; cell part; adherens junction; extracellular vesicle; membrane-bounded organelle; intracellular organelle;…	protein binding; delta-catenin binding; binding;				IPR011993; IPR001202; IPR001849;	PH domain-like; WW domain; Pleckstrin homology domain;		O	KOG0940	Ubiquitin protein ligase RSP5/NEDD4
O14974	995	S	Protein phosphatase 1 regulatory subunit 12A	PPP1R12A	0.514	0.0101	Down	Q2	1	0.0018	62.088	RIS(1)EMEEELK	3	-0.77323	nucleus	single organism signaling; positive regulation of cellular protein metabolic process; mitotic nuclear division; positive regulation of biosynthetic process; single-organism process; cellular metabolic process; phosphate-containing compound metabolic process; regulation of RNA biosynthetic process; signal transduction; metabolic process; cell communication; positive regulation of metabolic process…	cell junction; myofibril; cytoplasm; macromolecular complex; protein serine/threonine phosphatase complex; supramolecular fiber; intracellular part; Z disc; PTW/PP1 phosphatase complex; supramolecular complex; cell; I band; phosphatase complex; organelle part; chromosomal part; non-membrane-bounded organelle; membrane-enclosed lumen; cytoskeleton; microtubule organizing center; nucleoplasm; catal…	enzyme regulator activity; phosphatase regulator activity; binding; protein kinase binding; 14-3-3 protein binding; protein binding; enzyme inhibitor activity; molecular function regulator; kinase binding; signal transducer activity; enzyme binding;	K06270	PPP1R12A; protein phosphatase 1 regulatory subunit 12A	hsa04611 Platelet activation - Homo sapiens (human); hsa04921 Oxytocin signaling pathway - Homo sapiens (human); hsa04024 cAMP signaling pathway - Homo sapiens (human); hsa05205 Proteoglycans in cancer - Homo sapiens (human); hsa04510 Focal adhesion - Homo sapiens (human); hsa04022 cGMP-PKG signaling pathway - Homo sapiens (human); hsa04810 Regulation of actin cytoskeleton - Homo sapiens (human);…	IPR020683; IPR031775;	Ankyrin repeat-containing domain; cGMP-dependent protein kinase, interacting domain;	MRIP-MBS-RHOA complex; MRIP-MBS complex;	OT	KOG0505	Myosin phosphatase, regulatory subunit
Q00341	667	S	Vigilin	HDLBP	0.516	0.0115	Down	Q2	0.999387	0.00276	63.473	LHNS(0.999)LIGT(0.001)K	3	0.27017	cytoplasm	cholesterol metabolic process; lipid transport; organic hydroxy compound metabolic process; secondary alcohol metabolic process; alcohol metabolic process; small molecule metabolic process; steroid metabolic process; organic cyclic compound metabolic process; single-organism process; organic substance transport; lipid localization; primary metabolic process; sterol metabolic process; lipoprotein …	intracellular organelle; membrane; extracellular region part; extracellular space; cell periphery; plasma lipoprotein particle; cytoplasm; macromolecular complex; intracellular part; high-density lipoprotein particle; cytosol; cell; extracellular region; plasma membrane; organelle; intracellular membrane-bounded organelle; nucleus; protein-lipid complex; intracellular; cell part; lipoprotein part…	organic cyclic compound binding; heterocyclic compound binding; cell adhesion molecule binding; RNA binding; binding; cadherin binding; nucleic acid binding; lipid binding; protein binding;				IPR004087; IPR004088;	K Homology domain; K Homology domain, type 1;	DHX9-ADAR-vigilin-DNA-PK-Ku antigen complex; Vigilin-DNA-PK-Ku antigen complex;	I	KOG2208	Vigilin
O60716	857	S	Catenin delta-1	CTNND1	0.517	0.0451	Down	Q2	1	1.19e-07	134.76	SDFQVNLNNAS(1)R	2	-2.1877	nucleus	single organism signaling; entry into host; negative regulation of signal transduction; cell surface receptor signaling pathway; nucleic acid-templated transcription; brain development; regulation of signaling; cell-cell junction organization; negative regulation of canonical Wnt signaling pathway; single-organism process; biosynthetic process; cellular metabolic process; biological adhesion; reg…	dendrite; membrane; extracellular region part; cell periphery; cell junction; vesicle; cytoplasm; growth cone; intracellular part; cell-cell adherens junction; cell-cell junction; cell; dendritic spine; extracellular exosome; neuron spine; intracellular; cell part; lamellipodium; adherens junction; extracellular vesicle; neuron projection; membrane-bounded organelle; neuron part; synapse part; ce…	cell adhesion molecule binding; receptor binding; binding; cadherin binding; protein kinase binding; protein binding; kinase binding; enzyme binding;	K05690	CTNND1; catenin (cadherin-associated protein), delta 1	hsa04670 Leukocyte transendothelial migration - Homo sapiens (human); hsa04015 Rap1 signaling pathway - Homo sapiens (human); hsa04520 Adherens junction - Homo sapiens (human);	IPR011989; IPR016024;	Armadillo-like helical; Armadillo-type fold;		TW	KOG1048	Neural adherens junction protein Plakophilin and related Armadillo repeat proteins
P30086	52	S	Phosphatidylethanolamine-binding protein 1	PEBP1	0.517	0.00363	Down	Q2	0.959573	1.45e-32	195.25	NRPT(0.04)S(0.96)ISWDGLDSGK	3	-0.65616	cytoplasm	single organism signaling; regulation of cellular process; phosphorylation; negative regulation of endopeptidase activity; regulation of macromolecule metabolic process; cellular protein metabolic process; single-organism process; negative regulation of cellular metabolic process; negative regulation of cellular process; negative regulation of biological process; response to stimulus; cellular me…	intracellular organelle; extracellular region part; vesicle; cytoplasm; intracellular part; cell; cytosol; extracellular region; intracellular membrane-bounded organelle; organelle; extracellular exosome; nucleus; intracellular; cell part; extracellular vesicle; membrane-bounded organelle; extracellular organelle; cytoplasmic part;	nucleoside phosphate binding; peptidase regulator activity; protein kinase binding; protein binding; enzyme inhibitor activity; molecular function regulator; heterocyclic compound binding; organic cyclic compound binding; ribonucleotide binding; binding; peptidase inhibitor activity; purine ribonucleoside binding; lipid binding; endopeptidase regulator activity; anion binding; phosphatidylethanol…							R	KOG3346	Phosphatidylethanolamine binding protein
Q02318	56	S	Sterol 26-hydroxylase, mitochondrial	CYP27A1	0.517	0.0256	Down	Q2	1	0.0012	91.085	S(1)LEEIPR	2	-0.74216	mitochondria	organic acid biosynthetic process; organic hydroxy compound metabolic process; single-organism process; biosynthetic process; cellular metabolic process; sterol metabolic process; lipid biosynthetic process; organic substance metabolic process; metabolic process; monocarboxylic acid metabolic process; cellular process; bile acid metabolic process; lipid metabolic process; single-organism biosynth…	mitochondrial matrix; intracellular organelle; membrane; mitochondrial part; organelle membrane; organelle envelope; cytoplasm; intracellular organelle part; intracellular part; cell; mitochondrion; organelle part; mitochondrial envelope; membrane-enclosed lumen; organelle; intracellular membrane-bounded organelle; intracellular organelle lumen; cell part; intracellular; envelope; organelle inner…	iron ion binding; ion binding; oxidoreductase activity, acting on paired donors, with incorporation or reduction of molecular oxygen; oxidoreductase activity; steroid hydroxylase activity; heterocyclic compound binding; organic cyclic compound binding; heme binding; transition metal ion binding; catalytic activity; binding; metal ion binding; cation binding; tetrapyrrole binding; monooxygenase ac…	K00488	CYP27A; cholestanetriol 26-monooxygenase [EC:1.14.15.15]	hsa00120 Primary bile acid biosynthesis - Homo sapiens (human); hsa03320 PPAR signaling pathway - Homo sapiens (human); hsa01100 Metabolic pathways - Homo sapiens (human);				Q	KOG0159	Cytochrome P450 CYP11/CYP12/CYP24/CYP27 subfamilies
Q6PL18	1302	S	ATPase family AAA domain-containing protein 2	ATAD2	0.517	0.0131	Down	Q2	1	6.65e-08	118.72	S(1)QVEQQQLITVEK	3	0.23247	nucleus	nucleic acid-templated transcription; negative regulation of cellular component organization; positive regulation of biosynthetic process; biosynthetic process; cellular metabolic process; regulation of RNA biosynthetic process; metabolic process; positive regulation of metabolic process; positive regulation of nitrogen compound metabolic process; positive regulation of transcription from RNA pol…	intracellular organelle; extracellular region part; intracellular organelle part; vesicle; nuclear lumen; intracellular part; cell; extracellular region; organelle part; membrane-enclosed lumen; organelle; extracellular exosome; intracellular membrane-bounded organelle; nucleoplasm; nucleus; intracellular organelle lumen; intracellular; cell part; extracellular vesicle; membrane-bounded organelle…	histone binding; ATP binding; nucleoside phosphate binding; nucleoside binding; ion binding; hydrolase activity, acting on acid anhydrides; hydrolase activity; protein binding; chromatin binding; nucleotide binding; nucleoside-triphosphatase activity; ATPase activity; organic cyclic compound binding; heterocyclic compound binding; ribonucleoside binding; carbohydrate derivative binding; pyrophosp…				IPR003959; IPR003593; IPR011989; IPR027417; IPR001487;	ATPase, AAA-type, core; AAA+ ATPase domain; Armadillo-like helical; P-loop containing nucleoside triphosphate hydrolase; Bromodomain;		O	KOG0732	AAA+-type ATPase containing the bromodomain
Q8NC56	138	S	LEM domain-containing protein 2	LEMD2	0.517	8.63e-05	Down	Q2	1	1.13e-18	161.86	RAS(1)VRGS(1)S(1)EEDEDAR	3	0.10902	plasma membrane	regulation of protein kinase B signaling; reproductive process; chromosome attachment to the nuclear envelope; heart development; single organism reproductive process; nervous system development; regulation of phosphorylation; chromosome segregation; regulation of phosphorus metabolic process; regulation of primary metabolic process; muscle tissue development; meiotic telomere clustering; single-…	intracellular organelle; membrane; organelle membrane; nuclear envelope; intracellular organelle part; organelle envelope; intrinsic component of membrane; endomembrane system; intracellular part; cell; integral component of membrane; organelle part; organelle; intracellular membrane-bounded organelle; nuclear membrane; nucleus; intrinsic component of nuclear inner membrane; integral component of…	organic cyclic compound binding; heterocyclic compound binding; DNA binding; chromatin binding; chromatin DNA binding; binding; nucleic acid binding;				IPR011015; IPR003887; IPR018996;	LEM/LEM-like domain; LEM domain; Inner nuclear membrane protein MAN1;
Q9Y490	1201	S	Talin-1	TLN1	0.517	0.0281	Down	Q2	1	0.00114	103.08	CVS(1)CLPGQR	3	-0.43873	cytoplasm,nucleus	cellular component biogenesis; single organism signaling; blood coagulation; muscle system process; regulation of biological quality; cell-cell junction organization; single-organism process; multi-organism cellular process; endoplasmic reticulum unfolded protein response; establishment of localization; response to wounding; biological adhesion; single organismal cell-cell adhesion; actin cytoske…	membrane; extracellular region part; cell periphery; cell junction; ruffle membrane; vesicle; cytoplasm; intracellular part; cell-cell junction; cell; non-membrane-bounded organelle; cytoskeleton; extracellular exosome; focal adhesion; plasma membrane region; leading edge membrane; intracellular; cell part; membrane part; adherens junction; extracellular vesicle; cell-substrate junction; membrane…	actin filament binding; receptor binding; macromolecular complex binding; LIM domain binding; integrin binding; protein binding; cell adhesion molecule binding; cytoskeletal protein binding; structural constituent of cytoskeleton; vinculin binding; binding; cadherin binding; actin binding; protein domain specific binding; structural molecule activity; protein complex binding;	K06271	TLN; talin	hsa04611 Platelet activation - Homo sapiens (human); hsa04015 Rap1 signaling pathway - Homo sapiens (human); hsa05166 HTLV-I infection - Homo sapiens (human); hsa04510 Focal adhesion - Homo sapiens (human);	IPR019748; IPR002558; IPR015224; IPR032425; IPR019749; IPR018979; IPR015009; IPR029071; IPR011993; IPR014352; IPR000299;	FERM central domain; I/LWEQ domain; Talin, central; Talin, N-terminal F0 domain; Band 4.1 domain; FERM, N-terminal; Vinculin-binding site-containing domain; Ubiquitin-related domain; PH domain-like; FERM/acyl-CoA-binding protein, 3-helical bundle; FERM domain;	ITGA2b-ITGB3-TLN1 complex; Polycystin-1 multiprotein complex (ACTN1, CDH1, SRC, JUP, VCL, CTNNB1, PXN, BCAR1, PKD1, PTK2, TLN1);	Z	KOG4261	Talin
P21439	666	S	Phosphatidylcholine translocator ABCB4	ABCB4	0.518	0.00268	Down	Q2	1	0.00049	103.26	LFRHS(1)T(1)QK	3	-0.042631	plasma membrane	regulation of cell death; hormone transport; regulation of biological quality; gland development; digestion; regulation of sterol transport; reproductive process; brain development; cellular response to corticosteroid stimulus; regulation of membrane lipid distribution; positive regulation of phospholipid transport; response to vitamin A; response to biotic stimulus; response to flavonoid; respon…	membrane; cluster of actin-based cell projections; extracellular region part; membrane microdomain; cytoplasm; integral component of plasma membrane; cell; organelle part; non-membrane-bounded organelle; extracellular exosome; nucleoplasm; plasma membrane region; focal adhesion; clathrin-coated vesicle; intracellular; membrane region; cell-substrate junction; membrane-bounded organelle; apical pa…	nucleoside phosphate binding; primary active transmembrane transporter activity; xenobiotic transporter activity; lipid transporter activity; substrate-specific transporter activity; hydrolase activity, acting on acid anhydrides; protein binding; hydrolase activity; ATPase activity; heterocyclic compound binding; organic cyclic compound binding; pyrophosphatase activity; ribonucleotide binding; c…	K05659	ABCB4; ATP-binding cassette, subfamily B (MDR/TAP), member 4 [EC:3.6.3.44]	hsa04976 Bile secretion - Homo sapiens (human); hsa02010 ABC transporters - Homo sapiens (human);	IPR003593; IPR003439; IPR011527; IPR027417;	AAA+ ATPase domain; ABC transporter-like; ABC transporter type 1, transmembrane domain; P-loop containing nucleoside triphosphate hydrolase;		Q	KOG0055	Multidrug/pheromone exporter, ABC superfamily
Q92945	193	S	Far upstream element-binding protein 2	KHSRP	0.518	0.0128	Down	Q2	0.789319	3.97e-06	105.58	S(0.16)VS(0.789)LT(0.051)GAPESVQK	3	-0.0108	cytoplasm	RNA transport; regulation of biological quality; regulation of nitric oxide biosynthetic process; nucleic acid-templated transcription; posttranscriptional regulation of gene expression; cellular metabolic process; cellular response to cytokine stimulus; metabolic process; nucleobase-containing compound transport; negative regulation of macromolecule biosynthetic process; macromolecule metabolic …	cytoplasmic stress granule; intracellular organelle; membrane; intracellular non-membrane-bounded organelle; intracellular organelle part; cytoplasm; nuclear lumen; macromolecular complex; intracellular part; cytosol; cell; organelle part; cytoplasmic ribonucleoprotein granule; non-membrane-bounded organelle; membrane-enclosed lumen; intracellular membrane-bounded organelle; organelle; nucleoplas…	organic cyclic compound binding; heterocyclic compound binding; mRNA binding; DNA binding; RNA binding; AU-rich element binding; mRNA 3'-UTR binding; binding; nucleic acid binding; protein binding; mRNA 3'-UTR AU-rich region binding;	K13210			IPR004087; IPR004088; IPR015096;	K Homology domain; K Homology domain, type 1; Domain of unknown function DUF1897;		A	KOG1676	K-homology type RNA binding proteins
Q9BX66	350	S	Sorbin and SH3 domain-containing protein 1	SORBS1	0.518	0.0181	Down	Q2	0.808631	5.53e-18	133.84	RVGEQDSAPTQEKPT(0.191)S(0.809)PGK	3	0.55466	nucleus	cellular component biogenesis; single organism signaling; regulation of polysaccharide biosynthetic process; cell surface receptor signaling pathway; positive regulation of biosynthetic process; contractile actin filament bundle assembly; regulation of lipid metabolic process; biological adhesion; regulation of plasma membrane organization; actin cytoskeleton organization; regulation of localizat…	membrane; cell periphery; membrane microdomain; cell junction; cytoplasm; intracellular part; cell-cell adherens junction; cell; cell-cell junction; organelle part; actin filament bundle; non-membrane-bounded organelle; membrane-enclosed lumen; cytoskeleton; microtubule organizing center; intracellular organelle lumen; focal adhesion; microtubule cytoskeleton; membrane part; intracellular; cell p…	SH3/SH2 adaptor activity; protein binding, bridging; cytoskeletal protein binding; signaling adaptor activity; receptor binding; binding; macromolecular complex binding; actin binding; protein binding; binding, bridging; protein complex binding; insulin receptor binding;	K06086	SORBS1; sorbin and SH3 domain containing 1	hsa03320 PPAR signaling pathway - Homo sapiens (human); hsa04520 Adherens junction - Homo sapiens (human); hsa04910 Insulin signaling pathway - Homo sapiens (human);	IPR011511; IPR001452; IPR003127;	Variant SH3 domain; SH3 domain; SoHo domain;		T	KOG4225	Sorbin and SH3 domain-containing protein
Q7Z2W4	386	S	Zinc finger CCCH-type antiviral protein 1	ZC3HAV1	0.519	0.00109	Down	Q2	0.793516	1.15e-31	192.22	S(0.794)S(0.206)LGSLQTPEAVTTR	3	-0.64718	cytoplasm	positive regulation of type I interferon production; regulation of biological quality; modulation of molecular function in other organism; regulation of interferon-alpha production; defense response to other organism; regulation of defense response; response to biotic stimulus; response to external stimulus; positive regulation of multicellular organismal process; regulation of I-kappaB kinase/NF…	intracellular vesicle; intracellular organelle; late endosome; cytoplasmic vesicle; cytoplasm; vesicle; endomembrane system; intracellular part; cytosol; cell; intracellular membrane-bounded organelle; organelle; nucleus; cell part; intracellular; lysosome; vacuole; endosome; membrane-bounded organelle; cytoplasmic part; lytic vacuole;	transferase activity, transferring pentosyl groups; RNA binding; NAD+ ADP-ribosyltransferase activity; ion binding; protein binding; heterocyclic compound binding; organic cyclic compound binding; cell adhesion molecule binding; catalytic activity; binding; nucleic acid binding; cadherin binding; cation binding; metal ion binding; transferase activity, transferring glycosyl groups; transferase ac…	K15259			IPR000571; IPR004170; IPR012317;	Zinc finger, CCCH-type; WWE domain; Poly(ADP-ribose) polymerase, catalytic domain;
Q09666	5448	S	Neuroblast differentiation-associated protein AHNAK	AHNAK	0.52	0.0163	Down	Q2	1	1.09e-23	173.21	IS(1)APNVDFNLEGPK	2	0.37527	nucleus	regulation of cellular process; cellular component biogenesis; cellular component organization; regulation of macromolecule metabolic process; regulation of nucleobase-containing compound metabolic process; protein oligomerization; cellular component assembly; regulation of calcium ion transmembrane transporter activity; regulation of localization; macromolecular complex assembly; regulation of c…	membrane; extracellular region part; organelle membrane; cell periphery; cell-cell contact zone; cell junction; myofibril; cytoplasm; vesicle; supramolecular fiber; intracellular part; supramolecular complex; cell-cell junction; cell; organelle part; non-membrane-bounded organelle; T-tubule; lysosomal membrane; extracellular exosome; cytoskeleton; focal adhesion; membrane part; intracellular; cel…	organic cyclic compound binding; heterocyclic compound binding; cell adhesion molecule binding; RNA binding; binding; cadherin binding; nucleic acid binding; S100 protein binding; protein binding; structural molecule activity; structural molecule activity conferring elasticity;				IPR001478;	PDZ domain;	DNA ligase IV-XRCC4-AHNK complex;
Q9Y2H5	842	S	Pleckstrin homology domain-containing family A member 6	PLEKHA6	0.52	0.0153	Down	Q2	0.999999	2.03e-18	159.26	S(1)LQLPASPAPDPSPR	2	0.016866	nucleus							IPR011993; IPR001849;	PH domain-like; Pleckstrin homology domain;		F	KOG1738	Membrane-associated guanylate kinase-interacting protein/connector enhancer of KSR-like
Q9H6T0	269	S	Epithelial splicing regulatory protein 2	ESRP2	0.521	0.000482	Down	Q2	0.806061	3.88e-11	150.37	GLPWQS(0.194)S(0.806)DQDVAR	2	1.2076	nucleus	single organism signaling; gland development; cell surface receptor signaling pathway; respiratory tube development; single-organism process; cellular response to growth factor stimulus; fibroblast growth factor receptor signaling pathway; cellular metabolic process; branching morphogenesis of an epithelial tube; signal transduction; metabolic process; tissue morphogenesis; cell communication; re…	intracellular organelle; intracellular organelle part; nuclear lumen; intracellular part; cell; organelle part; organelle; intracellular membrane-bounded organelle; membrane-enclosed lumen; nucleoplasm; nucleus; intracellular organelle lumen; cell part; intracellular; membrane-bounded organelle; organelle lumen; nuclear part;	organic cyclic compound binding; heterocyclic compound binding; mRNA binding; RNA binding; nucleoside phosphate binding; binding; nucleic acid binding; nucleotide binding; small molecule binding;	K14947			IPR000504; IPR012677; IPR012337;	RNA recognition motif domain; Nucleotide-binding alpha-beta plait domain; Ribonuclease H-like domain;		AR	KOG1365	RNA-binding protein Fusilli, contains RRM domain
O00571	594	S	ATP-dependent RNA helicase DDX3X	DDX3X	0.523	0.0154	Down	Q2	1	0.00704	71.221	FS(1)GGFGAR	2	-0.81339	nucleus	cellular component biogenesis; single organism signaling; regulation of cell death; posttranscriptional regulation of gene expression; positive regulation of biosynthetic process; regulation of cell cycle process; cellular metabolic process; response to biotic stimulus; positive regulation of growth; regulation of cell growth; negative regulation of peptidase activity; metabolic process; macromol…	secretory granule lumen; membrane; outer membrane; extracellular region part; organelle membrane; cytoplasmic vesicle; vesicle; cytoplasm; cytoplasmic vesicle part; macromolecular complex; intracellular part; nuclear body; cell; ficolin-1-rich granule lumen; cytoplasmic ribonucleoprotein granule; organelle part; non-membrane-bounded organelle; mitochondrial envelope; extracellular exosome; membra…	mRNA 5'-UTR binding; nucleoside phosphate binding; ATP-dependent helicase activity; hydrolase activity, acting on acid anhydrides; protein binding; hydrolase activity; CTPase activity; ATPase activity; heterocyclic compound binding; organic cyclic compound binding; mRNA binding; pyrophosphatase activity; ribonucleotide binding; catalytic activity; ribosomal small subunit binding; translation init…	K11594	DDX3X; ATP-dependent RNA helicase DDX3X [EC:3.6.4.13]	hsa04622 RIG-I-like receptor signaling pathway - Homo sapiens (human); hsa05161 Hepatitis B - Homo sapiens (human); hsa05203 Viral carcinogenesis - Homo sapiens (human);	IPR014014; IPR011545; IPR014001; IPR027417; IPR001650;	RNA helicase, DEAD-box type, Q motif; DEAD/DEAH box helicase domain; Helicase superfamily 1/2, ATP-binding domain; P-loop containing nucleoside triphosphate hydrolase; Helicase, C-terminal;	Large Drosha complex; TNF-alpha/Nf-kappa B signaling complex (RPL6, RPL30, RPS13, CHUK, DDX3X, NFKB2, NFKBIB, REL, IKBKG, NFKB1, MAP3K8, RELB, GLG1, NFKBIA, RELA, TNIP2, GTF2I); Spliceosome;	A	KOG0335	ATP-dependent RNA helicase
Q92608	1706	S	Dedicator of cytokinesis protein 2	DOCK2	0.523	0.00138	Down	Q2	0.750568	0.000187	108.23	RS(0.249)S(0.751)VVFADEK	3	-1.0421	plasma membrane	single organism signaling; regulation of vesicle-mediated transport; leukocyte activation; regulation of defense response; T cell activation; response to external stimulus; actin cytoskeleton organization; regulation of defense response to virus by virus; regulation of localization; positive regulation of molecular function; negative T cell selection; single-organism transport; secretion; cellula…	secretory granule lumen; membrane; extracellular region part; cytoplasmic vesicle; vesicle; cytoplasm; cytoplasmic vesicle part; intracellular part; cell; organelle part; non-membrane-bounded organelle; membrane-enclosed lumen; cytoskeleton; extracellular exosome; vesicle lumen; intracellular organelle lumen; intracellular; cell part; secretory vesicle; extracellular vesicle; secretory granule; m…	receptor binding; guanyl-nucleotide exchange factor activity; nucleoside-triphosphatase regulator activity; GTPase regulator activity; T cell receptor binding; macromolecular complex binding; protein binding; molecular function regulator; Rac guanyl-nucleotide exchange factor activity; enzyme regulator activity; binding; Ras guanyl-nucleotide exchange factor activity; enzyme activator activity; G…	K12367	DOCK2; dedicator of cytokinesis protein 2	hsa04666 Fc gamma R-mediated phagocytosis - Homo sapiens (human); hsa04062 Chemokine signaling pathway - Homo sapiens (human);	IPR001452; IPR027357; IPR010703; IPR027007; IPR016024; IPR032376;	SH3 domain; DHR-2 domain; Dedicator of cytokinesis, C-terminal; DHR-1 domain; Armadillo-type fold; Dedicator of cytokinesis, N-terminal domain;	ELMO1-DOCK2 complex;	T	KOG1998	Signaling protein DOCK180
Q92667	592	S	A-kinase anchor protein 1, mitochondrial	AKAP1	0.523	0.0312	Down	Q2	0.83098	9.06e-13	127.32	KT(0.169)ES(0.831)FQNAQAGSNPK	4	-0.26597	mitochondria	regulation of cellular process; single-multicellular organism process; blood coagulation; regulation of biological quality; regulation of body fluid levels; regulation of intracellular signal transduction; response to stress; regulation of signaling; single-organism process; response to stimulus; multicellular organismal process; hemostasis; response to wounding; regulation of protein kinase A si…	intracellular organelle; membrane; outer membrane; mitochondrial part; bounding membrane of organelle; organelle membrane; mitochondrial outer membrane; cytoplasm; intracellular organelle part; organelle envelope; intrinsic component of membrane; intracellular part; cytosol; cell; integral component of membrane; organelle part; mitochondrion; organelle; intracellular membrane-bounded organelle; m…	organic cyclic compound binding; heterocyclic compound binding; protein kinase A binding; RNA binding; protein kinase A regulatory subunit binding; binding; nucleic acid binding; protein binding;	K16518			IPR004087; IPR004088; IPR002999;	K Homology domain; K Homology domain, type 1; Tudor domain;	AMY-1-S-AKAP84-RII-beta complex;	T	KOG2279	Kinase anchor protein AKAP149, contains KH and Tudor RNA-binding domains
Q99959	313	S	Plakophilin-2	PKP2	0.523	0.00699	Down	Q2	0.959486	2.11e-24	178.34	EAGPSVAVDS(0.041)S(0.959)GRR	3	0.91314	nucleus	single organism signaling; cellular component biogenesis; regulation of biological quality; keratinization; muscle tissue morphogenesis; establishment of protein localization to plasma membrane; negative regulation of cell proliferation; biological adhesion; bundle of His cell-Purkinje myocyte adhesion involved in cell communication; cardiac conduction; epidermal cell differentiation; regulation …	membrane; cell periphery; cell-cell contact zone; cell junction; intrinsic component of membrane; supramolecular fiber; intracellular part; supramolecular complex; cell; cell-cell junction; organelle part; intercalated disc; non-membrane-bounded organelle; cytoskeleton; membrane-enclosed lumen; nucleoplasm; intracellular organelle lumen; membrane part; intracellular; cell part; adherens junction;…	protein kinase binding; macromolecular complex binding; cell adhesive protein binding involved in bundle of His cell-Purkinje myocyte communication; protein binding; sodium channel regulator activity; kinase binding; alpha-catenin binding; protein binding involved in cell-cell adhesion; molecular function regulator; protein binding involved in heterotypic cell-cell adhesion; protein complex scaff…	K12642	PKP2; plakophilin 2	hsa05412 Arrhythmogenic right ventricular cardiomyopathy (ARVC) - Homo sapiens (human);	IPR011989; IPR016024;	Armadillo-like helical; Armadillo-type fold;		TW	KOG1048	Neural adherens junction protein Plakophilin and related Armadillo repeat proteins
Q9C0I1	564	S	Myotubularin-related protein 12	MTMR12	0.524	0.0412	Down	Q2	0.996159	0.000132	115.34	QLS(0.996)LPLT(0.004)QSK	3	0.30172	cytoplasm	transport; regulation of catalytic activity; regulation of molecular function; toxin transport; localization; establishment of localization; biological regulation;	intracellular part; cell; cell part; intracellular; cytoplasm;	protein binding; molecular function regulator; enzyme regulator activity; phosphatase regulator activity; binding;	K18085			IPR029021; IPR022587; IPR011993; IPR010569;	Protein-tyrosine phosphatase-like; Myotubularin-related 12-like C-terminal domain; PH domain-like; Myotubularin-like phosphatase domain;		R	KOG1089	Myotubularin-related phosphatidylinositol 3-phosphate 3-phosphatase MTM6
P22087	124	S	rRNA 2'-O-methyltransferase fibrillarin	FBL	0.525	0.0278	Down	Q2	0.9029	0.00415	47.726	RVS(0.903)IS(0.093)EGDDKIEY(0.004)R	3	1.0112	nucleus	cellular component biogenesis; osteoblast differentiation; ribonucleoprotein complex biogenesis; cellular developmental process; single-organism process; peptidyl-glutamine methylation; RNA modification; cellular metabolic process; methylation; histone glutamine methylation; ncRNA 3'-end processing; protein alkylation; metabolic process; rRNA processing; protein metabolic process; macromolecule m…	membrane; extracellular region part; vesicle; macromolecular complex; intracellular part; nuclear body; cell; Cajal body; organelle part; preribosome; non-membrane-bounded organelle; extracellular exosome; membrane-enclosed lumen; nucleoplasm; intracellular organelle lumen; cell part; intracellular; chromosome; extracellular vesicle; granular component; small-subunit processome; membrane-bounded …	histone-glutamine methyltransferase activity; RNA binding; S-adenosylmethionine-dependent methyltransferase activity; basal RNA polymerase II transcription machinery binding; methyltransferase activity; ATPase binding; transferase activity, transferring one-carbon groups; protein binding; protein-glutamine N-methyltransferase activity; heterocyclic compound binding; organic cyclic compound bindin…	K14563	NOP1; rRNA 2'-O-methyltransferase fibrillarin [EC:2.1.1.-]	hsa03008 Ribosome biogenesis in eukaryotes - Homo sapiens (human);	IPR029063;	S-adenosyl-L-methionine-dependent methyltransferase;	TNF-alpha/NF-kappa B signaling complex 6; FIB-associated protein complex; CEN complex; Nop56p-associated pre-rRNA complex;	A	KOG1596	Fibrillarin and related nucleolar RNA-binding proteins
Q09666	5519	S	Neuroblast differentiation-associated protein AHNAK	AHNAK	0.525	0.0284	Down	Q2	0.999979	4.63e-06	109.1	LPTGQIS(1)GPEIK	3	-0.40229	nucleus	regulation of cellular process; cellular component biogenesis; cellular component organization; regulation of macromolecule metabolic process; regulation of nucleobase-containing compound metabolic process; protein oligomerization; cellular component assembly; regulation of calcium ion transmembrane transporter activity; regulation of localization; macromolecular complex assembly; regulation of c…	membrane; extracellular region part; organelle membrane; cell periphery; cell-cell contact zone; cell junction; myofibril; cytoplasm; vesicle; supramolecular fiber; intracellular part; supramolecular complex; cell-cell junction; cell; organelle part; non-membrane-bounded organelle; T-tubule; lysosomal membrane; extracellular exosome; cytoskeleton; focal adhesion; membrane part; intracellular; cel…	organic cyclic compound binding; heterocyclic compound binding; cell adhesion molecule binding; RNA binding; binding; cadherin binding; nucleic acid binding; S100 protein binding; protein binding; structural molecule activity; structural molecule activity conferring elasticity;				IPR001478;	PDZ domain;	DNA ligase IV-XRCC4-AHNK complex;
Q9NSK0	590	S	Kinesin light chain 4	KLC4	0.525	0.0195	Down	Q2	0.999285	1.18e-17	133.53	AAS(0.999)LNY(0.001)LNQPSAAPLQVSR	3	-0.76684	nucleus		intracellular organelle; polymeric cytoskeletal fiber; microtubule; intracellular non-membrane-bounded organelle; cytoskeletal part; cytoplasm; intracellular organelle part; macromolecular complex; supramolecular fiber; intracellular part; microtubule associated complex; supramolecular complex; cell; organelle part; supramolecular polymer; kinesin complex; non-membrane-bounded organelle; organell…	pyrophosphatase activity; motor activity; catalytic activity; binding; hydrolase activity, acting on acid anhydrides; protein binding; hydrolase activity; nucleoside-triphosphatase activity; hydrolase activity, acting on acid anhydrides, in phosphorus-containing anhydrides; microtubule motor activity;	K10407	KLC; kinesin light chain	hsa05132 Salmonella infection - Homo sapiens (human);	IPR011990; IPR013026;	Tetratricopeptide-like helical domain; Tetratricopeptide repeat-containing domain;		Z	KOG1840	Kinesin light chain
Q08211	449	S	ATP-dependent RNA helicase A	DHX9	0.528	0.0096	Down	Q2	0.999895	0.000206	91.712	RIS(1)AVSVAER	3	0.17657	nucleus	osteoblast differentiation; positive regulation of type I interferon production; regulation of biological quality; protein localization to cytoplasmic stress granule; posttranscriptional regulation of gene expression; RNA stabilization; cellular developmental process; DNA geometric change; single-organism process; cellular metabolic process; metabolic process; positive regulation of multicellular…	membrane; cytoplasm; macromolecular complex; intracellular part; cell; cytoplasmic ribonucleoprotein granule; organelle part; non-membrane-bounded organelle; cytoskeleton; membrane-enclosed lumen; microtubule organizing center; nucleoplasm; intracellular organelle lumen; microtubule cytoskeleton; cell part; intracellular; membrane-bounded organelle; organelle lumen; intracellular organelle; nucle…	nucleoside phosphate binding; ATP-dependent helicase activity; hydrolase activity, acting on acid anhydrides; protein binding; hydrolase activity; ATPase activity; heterocyclic compound binding; organic cyclic compound binding; pyrophosphatase activity; catalytic activity; ribonucleotide binding; RNA polymerase II transcription factor binding; binding; ATP-dependent DNA helicase activity; purine …	K13184			IPR007502; IPR011545; IPR011709; IPR014720; IPR014001; IPR027417; IPR001650;	Helicase-associated domain; DEAD/DEAH box helicase domain; Domain of unknown function DUF1605; Double-stranded RNA-binding domain; Helicase superfamily 1/2, ATP-binding domain; P-loop containing nucleoside triphosphate hydrolase; Helicase, C-terminal;	Nop56p-associated pre-rRNA complex; STAT6-p100-RHA complex; Spliceosome; SMN-PolII-RHA complex; PCNA complex; DHX9-ADAR-vigilin-DNA-PK-Ku antigen complex; GammaH2AFX-NDHII-Ku70-DNA complex; Toposome; DGCR8 multiprotein complex;	K	KOG0921	Dosage compensation complex, subunit MLE
Q15149	4626	S	Plectin	PLEC	0.528	0.00133	Down	Q2	0.988273	1.28e-29	177.09	GYYSPYSVSGS(0.009)GS(0.287)T(0.715)AGS(0.988)R	3	0.018406	cytoplasm,nucleus	cellular component biogenesis; cellular component organization; cell junction assembly; cell-substrate junction assembly; cell junction organization; cellular component assembly; hemidesmosome assembly; single-organism cellular process; single-organism process; cellular process; cellular component organization or biogenesis;	membrane; extracellular region part; cluster of actin-based cell projections; brush border; cell periphery; cell junction; myofibril; vesicle; cytoplasm; supramolecular fiber; intracellular part; supramolecular complex; sarcoplasm; cell; organelle part; non-membrane-bounded organelle; cytoskeleton; extracellular exosome; focal adhesion; cell part; intracellular; contractile fiber; adherens juncti…	organic cyclic compound binding; heterocyclic compound binding; cell adhesion molecule binding; RNA binding; cytoskeletal protein binding; binding; cadherin binding; nucleic acid binding; actin binding; protein binding; structural constituent of muscle; ankyrin binding; structural molecule activity;	K10388			IPR001715; IPR005326;	Calponin homology domain; Plectin/S10, N-terminal;		J	KOG3344	40s ribosomal protein s10
Q68EM7	162	S	Rho GTPase-activating protein 17	ARHGAP17	0.528	0.0184	Down	Q2	0.976984	6.18e-15	166.9	S(0.023)S(0.977)GTNFQGLPSK	2	0.17743	nucleus	regulation of cellular process; single organism signaling; cellular response to stimulus; regulation of intracellular signal transduction; positive regulation of GTPase activity; regulation of signaling; single-organism process; signaling; response to stimulus; positive regulation of catalytic activity; signal transduction; regulation of cell communication; regulation of biological process; cell …	intracellular organelle; membrane; cell periphery; cell junction; cytoplasm; intracellular part; cell-cell junction; cytosol; cell; bicellular tight junction; apical junction complex; plasma membrane; intracellular membrane-bounded organelle; organelle; nucleus; occluding junction; intracellular; cell part; membrane-bounded organelle; cytoplasmic part;	enzyme regulator activity; nucleoside-triphosphatase regulator activity; binding; GTPase regulator activity; protein binding; protein domain specific binding; molecular function regulator; SH3 domain binding; enzyme activator activity; GTPase activator activity;	K20638	ARHGAP17; Rho GTPase-activating protein 17	hsa04530 Tight junction - Homo sapiens (human);	IPR027267; IPR004148; IPR008936; IPR000198;	Arfaptin homology (AH) domain/BAR domain; BAR domain; Rho GTPase activation protein; Rho GTPase-activating protein domain;	RICH1/AMOT polarity complex, Flag-Rich1 precipitated; RICH1-PAR3-aPKC polarity complex; RICH1/AMOT polarity complex, Flag-Amot precipitated;	T	KOG4270	GTPase-activator protein
Q96RT1	872	S	Erbin	ERBIN	0.529	0.0253	Down	Q2	0.958558	8.86e-09	129.01	S(0.018)HS(0.959)IT(0.024)NMEIGGLK	3	-0.56149	mitochondria	single organism signaling; negative regulation of sequence-specific DNA binding transcription factor activity; negative regulation of signal transduction; cell surface receptor signaling pathway; establishment or maintenance of apical/basal cell polarity; regulation of signaling; negative regulation of multicellular organismal process; single-organism process; negative regulation of nucleotide-bi…	basolateral plasma membrane; membrane; extracellular region part; organelle membrane; cell junction; cell periphery; cytoplasm; intracellular part; nuclear body; cell; extracellular matrix component; organelle part; basement membrane; membrane-enclosed lumen; nucleoplasm; nuclear membrane; intracellular organelle lumen; plasma membrane region; nuclear speck; cell part; membrane part; intracellula…	ErbB-2 class receptor binding; cell adhesion molecule binding; structural constituent of cytoskeleton; receptor binding; binding; macromolecular complex binding; protein binding; integrin binding; structural molecule activity; protein complex binding;	K12796	ERBB2IP; erbb2-interacting protein	hsa04621 NOD-like receptor signaling pathway - Homo sapiens (human);	IPR001478; IPR032675;	PDZ domain; Leucine-rich repeat domain, L domain-like;		R	KOG0619	FOG: Leucine rich repeat
O15438	908	S	Canalicular multispecific organic anion transporter 2	ABCC3	0.53	0.0204	Down	Q2	0.933899	2.25e-16	129.85	QLS(0.934)ALS(0.066)SDGEGQGRPVPR	3	-0.14247	plasma membrane	inorganic anion transmembrane transport; organic hydroxy compound transport; ion transmembrane transport; bile acid and bile salt transport; ATP hydrolysis coupled transmembrane transport; single-organism process; response to stimulus; anion transmembrane transport; establishment of localization; response to drug; single-organism localization; monocarboxylic acid transport; macromolecule localiza…	basolateral plasma membrane; membrane; intrinsic component of plasma membrane; plasma membrane region; plasma membrane part; membrane part; cell part; cell periphery; intrinsic component of membrane; integral component of plasma membrane; cell; integral component of membrane; plasma membrane;	ATPase coupled ion transmembrane transporter activity; nucleoside phosphate binding; primary active transmembrane transporter activity; xenobiotic transporter activity; lipid transporter activity; substrate-specific transporter activity; hydrolase activity, acting on acid anhydrides; hydrolase activity; substrate-specific transmembrane transporter activity; ATPase activity; organic cyclic compoun…	K05667	ABCC3; ATP-binding cassette, subfamily C (CFTR/MRP), member 3	hsa01523 Antifolate resistance - Homo sapiens (human); hsa04976 Bile secretion - Homo sapiens (human); hsa02010 ABC transporters - Homo sapiens (human);	IPR003593; IPR003439; IPR027417; IPR011527;	AAA+ ATPase domain; ABC transporter-like; P-loop containing nucleoside triphosphate hydrolase; ABC transporter type 1, transmembrane domain;		Q	KOG0054	Multidrug resistance-associated protein/mitoxantrone resistance protein, ABC superfamily
O14639	452	S	Actin-binding LIM protein 1	ABLIM1	0.531	0.00904	Down	Q2	0.982391	1.78e-31	193.19	S(0.001)T(0.016)S(0.982)QGS(0.001)INSPVYSR	2	1.895	nucleus	cellular component biogenesis; single-multicellular organism process; cellular component organization; lamellipodium organization; visual perception; cilium assembly; single-organism process; cilium organization; neurological system process; anatomical structure morphogenesis; organelle assembly; cellular component assembly; multicellular organism development; cytoskeleton organization; cellular …	cell leading edge; intracellular organelle; cell projection; intracellular non-membrane-bounded organelle; cytoskeletal part; intracellular organelle part; cytoplasm; contractile actin filament bundle; intracellular part; cell; actin cytoskeleton; organelle part; actin filament bundle; non-membrane-bounded organelle; organelle; cytoskeleton; intracellular; cell part; lamellipodium; stress fiber; …	cytoskeletal protein binding; transition metal ion binding; binding; ion binding; actin binding; cation binding; metal ion binding; protein binding; zinc ion binding;	K07520	ABLIM; actin-binding LIM protein	hsa04360 Axon guidance - Homo sapiens (human);	IPR001781; IPR003128; IPR032402;	Zinc finger, LIM-type; Villin headpiece; Putative adherens-junction anchoring domain;		TZ	KOG1044	Actin-binding LIM Zn-finger protein Limatin involved in axon guidance
P04792	82	S	Heat shock protein beta-1	HSPB1	0.533	0.0326	Down	Q2	0.9878	7.45e-06	137.93	QLS(0.988)S(0.94)GVS(0.072)EIR	2	0.26756	nucleus	single organism signaling; protein transport along microtubule; blood coagulation; regulation of biological quality; positive regulation of cell migration; regulation of cell death; regulation of tumor necrosis factor production; positive regulation of cytokine biosynthetic process; cell surface receptor signaling pathway; posttranscriptional regulation of gene expression; positive regulation of …	membrane; extracellular space; extracellular region part; cell periphery; cell junction; myofibril; cytoplasmic region; vesicle; cytoplasm; cell projection cytoplasm; macromolecular complex; supramolecular fiber; intracellular part; Z disc; supramolecular complex; cell; I band; organelle part; endopeptidase complex; non-membrane-bounded organelle; cytoskeleton; extracellular exosome; catalytic co…	protein serine/threonine kinase inhibitor activity; RNA binding; protein kinase binding; protein kinase inhibitor activity; protein kinase C inhibitor activity; protein binding; kinase regulator activity; protein kinase regulator activity; enzyme inhibitor activity; molecular function regulator; kinase binding; ubiquitin-like protein binding; protein binding involved in protein folding; heterocyc…	K04455	HSPB1; heat shock protein beta-1	hsa04010 MAPK signaling pathway - Homo sapiens (human); hsa05169 Epstein-Barr virus infection - Homo sapiens (human); hsa04370 VEGF signaling pathway - Homo sapiens (human); hsa05146 Amoebiasis - Homo sapiens (human);	IPR002068; IPR008978;	Alpha crystallin/Hsp20 domain; HSP20-like chaperone;		O	KOG3591	Alpha crystallins
Q12955	1459	S	Ankyrin-3	ANK3	0.533	0.00524	Down	Q2	0.999955	6.52e-11	157.09	RQS(1)FASLALR	3	-0.23971	nucleus	cellular component biogenesis; single organism signaling; cellular response to magnesium ion; regulation of biological quality; magnesium ion homeostasis; regulation of protein targeting; negative regulation of potassium ion transmembrane transporter activity; cellular component morphogenesis; establishment of protein localization to plasma membrane; positive regulation of membrane depolarization…	membrane; dendrite; cytoplasm; sarcoplasm; supramolecular complex; cell; I band; intercalated disc; organelle part; non-membrane-bounded organelle; T-tubule; plasma membrane region; intracellular; lysosome; synaptic membrane; neuron projection; membrane-bounded organelle; neuron part; lytic vacuole; cell projection; axon initial segment; lateral plasma membrane; axon part; plasma membrane; supram…	cell adhesion molecule binding; protein binding, bridging; cytoskeletal protein binding; structural constituent of cytoskeleton; binding; cadherin binding; ion channel binding; protein binding; binding, bridging; structural molecule activity; spectrin binding;	K10380	ANK; ankyrin	hsa05205 Proteoglycans in cancer - Homo sapiens (human);	IPR000488; IPR000906; IPR020683; IPR011029;	Death domain; ZU5 domain; Ankyrin repeat-containing domain; Death-like domain;		M	KOG4177	Ankyrin
Q96LL9	39	S	DnaJ homolog subfamily C member 30	DNAJC30	0.534	0.00254	Down	Q2	0.999847	1.18e-06	138.73	TYS(1)QGDCSYSR	2	0.18628	mitochondria		organelle; intracellular membrane-bounded organelle; intracellular organelle; cell part; intracellular; cytoplasm; intracellular part; membrane-bounded organelle; cytosol; cell; mitochondrion; cytoplasmic part;		K19374			IPR001623;	DnaJ domain;		O	KOG0691	Molecular chaperone (DnaJ superfamily)
P16949	63	S	Stathmin	STMN1	0.535	0.0493	Down	Q2	1	6.29e-06	132.97	RKS(1)HEAEVLK	4	-0.060848	nucleus	single organism signaling; negative regulation of microtubule polymerization or depolymerization; microtubule polymerization or depolymerization; brain development; mitotic nuclear division; negative regulation of cellular component organization; neuron development; cellular developmental process; cellular component morphogenesis; neurogenesis; single-organism process; multi-organism cellular pro…	intracellular organelle; membrane; cell projection; extracellular region part; polymeric cytoskeletal fiber; microtubule; intracellular non-membrane-bounded organelle; cytoskeletal part; vesicle; cytoplasm; intracellular organelle part; intracellular part; supramolecular fiber; cytosol; cell; supramolecular complex; extracellular region; organelle part; supramolecular polymer; non-membrane-bounde…	tubulin binding; protein binding; cytoskeletal protein binding; signal transducer activity; binding;	K04381	STMN1; stathmin	hsa04010 MAPK signaling pathway - Homo sapiens (human); hsa05206 MicroRNAs in cancer - Homo sapiens (human);
P42167	66	S	Lamina-associated polypeptide 2, isoforms beta/gamma	TMPO	0.536	0.00863	Down	Q2	1	1.42e-60	189.24	GPPDFS(1)S(1)DEEREPTPVLGSGAAAAGR	3	0.46408	cytoplasm		intracellular organelle; membrane; organelle membrane; nuclear envelope; cytoplasm; intracellular organelle part; organelle envelope; intrinsic component of membrane; endomembrane system; intracellular part; cell; integral component of membrane; organelle part; organelle; intracellular membrane-bounded organelle; nuclear membrane; nucleus; membrane part; cell part; intracellular; envelope; organe…	organic cyclic compound binding; heterocyclic compound binding; DNA binding; lamin binding; binding; nucleic acid binding; protein binding;				IPR013146; IPR003887; IPR011015;	LEM-like domain; LEM domain; LEM/LEM-like domain;
Q14839	703	T	Chromodomain-helicase-DNA-binding protein 4	CHD4	0.536	0.00222	Down	Q2	0.984386	3.99e-13	131.54	KLERPPET(0.984)PT(0.016)VDPTVK	4	0.59242	nucleus	cellular component biogenesis; nucleic acid-templated transcription; regulation of signaling; DNA geometric change; single-organism process; biosynthetic process; negative regulation of RNA metabolic process; cellular metabolic process; regulation of RNA biosynthetic process; metabolic process; regulation of cell communication; spindle assembly; cellular component assembly; negative regulation of…	membrane; cytoplasm; macromolecular complex; transcriptional repressor complex; intracellular part; SWI/SNF superfamily-type complex; cell; histone deacetylase complex; organelle part; nuclear transcriptional repressor complex; chromosomal part; non-membrane-bounded organelle; membrane-enclosed lumen; cytoskeleton; catalytic complex; microtubule organizing center; nucleoplasm; intracellular organ…	nucleoside phosphate binding; ATP-dependent helicase activity; hydrolase activity, acting on acid anhydrides; protein binding; hydrolase activity; ATPase activity; organic cyclic compound binding; heterocyclic compound binding; cytoskeletal protein binding; pyrophosphatase activity; histone deacetylase binding; repressing transcription factor binding; ribonucleotide binding; catalytic activity; R…	K11643	CHD4; chromodomain-helicase-DNA-binding protein 4 [EC:3.6.4.12]	hsa05203 Viral carcinogenesis - Homo sapiens (human);	IPR009463; IPR001965; IPR027417; IPR009462; IPR000953; IPR012958; IPR000330; IPR023780; IPR013083; IPR014001; IPR016197; IPR011011; IPR001650; IPR012957; IPR019787;	Domain of unknown function DUF1087; Zinc finger, PHD-type; P-loop containing nucleoside triphosphate hydrolase; Domain of unknown function DUF1086; Chromo/chromo shadow domain; CHD, N-terminal; SNF2-related, N-terminal domain; Chromo domain; Zinc finger, RING/FYVE/PHD-type; Helicase superfamily 1/2, ATP-binding domain; Chromo domain-like; Zinc finger, FYVE/PHD-type; Helicase, C-terminal; CHD, C-t…	Mi2/NuRD complex; Emerin complex 32; PID complex; LARC complex (LCR-associated remodeling complex); NuRD.1 complex; Anti-HDAC2 complex; MTA2 complex; MeCP1 complex; NRD complex (Nucleosome remodeling and deacetylation complex); Mi2/NuRD-BCL6-MTA3 complex; ATR-HDAC2-CHD4 complex;	R	KOG0383	Predicted helicase
Q9BTC0	1456	S	Death-inducer obliterator 1	DIDO1	0.536	0.00163	Down	Q2	1	8.57e-45	169.13	RNS(1)VERPAEPVAGAATPSLVEQQK	4	0.15755	nucleus	regulation of cellular process; single organism signaling; apoptotic signaling pathway; cellular aromatic compound metabolic process; nucleic acid-templated transcription; single-organism process; biosynthetic process; response to stimulus; cellular metabolic process; organic substance metabolic process; metabolic process; signal transduction; heterocycle metabolic process; cell communication; nu…	intracellular organelle; intracellular non-membrane-bounded organelle; cytoskeletal part; intracellular organelle part; cytoplasm; intracellular part; cell; spindle; organelle part; non-membrane-bounded organelle; organelle; cytoskeleton; intracellular membrane-bounded organelle; nucleus; microtubule cytoskeleton; intracellular; cell part; membrane-bounded organelle;	organic cyclic compound binding; heterocyclic compound binding; RNA binding; transition metal ion binding; binding; ion binding; nucleic acid binding; cation binding; metal ion binding; protein binding; zinc ion binding;				IPR012921; IPR013083; IPR001965; IPR003618; IPR011011; IPR019787;	Spen paralogue and orthologue SPOC, C-terminal; Zinc finger, RING/FYVE/PHD-type; Zinc finger, PHD-type; Transcription elongation factor S-II, central domain; Zinc finger, FYVE/PHD-type; Zinc finger, PHD-finger;		R	KOG1632	Uncharacterized PHD Zn-finger protein
Q9H4M7	575	S	Pleckstrin homology domain-containing family A member 4	PLEKHA4	0.536	0.00407	Down	Q2	0.999723	0.00439	54.772	HLPS(1)PQLGTK	3	-0.20769	mitochondria	glycerolipid metabolic process; single-organism biosynthetic process; phosphatidylinositol biosynthetic process; phospholipid biosynthetic process; single-organism cellular process; single-organism process; biosynthetic process; cellular lipid metabolic process; primary metabolic process; cellular metabolic process; organic substance biosynthetic process; phosphate-containing compound metabolic p…	membrane; cell periphery; cell part; intracellular; cytoplasm; intracellular part; cell; plasma membrane;	1-phosphatidylinositol binding; binding; phospholipid binding; phosphatidylinositol binding; ion binding; lipid binding; anion binding;				IPR011993; IPR001849;	PH domain-like; Pleckstrin homology domain;		F	KOG1738	Membrane-associated guanylate kinase-interacting protein/connector enhancer of KSR-like
P38159	208	S	RNA-binding motif protein, X chromosome	RBMX	0.537	0.0328	Down	Q2	1	3.31e-09	126.19	RDVYLS(1)PR	3	0.13296	nucleus	cellular component biogenesis; osteoblast differentiation; ribonucleoprotein complex biogenesis; regulation of alternative mRNA splicing, via spliceosome; ribonucleoprotein complex assembly; nucleic acid-templated transcription; positive regulation of biosynthetic process; negative regulation of mRNA processing; response to interleukin-1; cellular response to cytokine stimulus; cellular metabolic…	membrane; extracellular space; extracellular region part; vesicle; macromolecular complex; intracellular part; cell; organelle part; chromosomal part; non-membrane-bounded organelle; membrane-enclosed lumen; extracellular exosome; catalytic complex; nucleoplasm; intracellular organelle lumen; nuclear chromosome part; intracellular; cell part; chromosome; nuclear chromatin; extracellular vesicle; …	RNA binding; DNA binding; nucleoside phosphate binding; protein binding; nucleotide binding; chromatin binding; single-stranded RNA binding; core promoter binding; heterocyclic compound binding; regulatory region DNA binding; organic cyclic compound binding; mRNA binding; regulatory region nucleic acid binding; identical protein binding; binding; transcription regulatory region DNA binding; nucle…	K12885	RBMX; heterogeneous nuclear ribonucleoprotein G	hsa03040 Spliceosome - Homo sapiens (human);	IPR000504; IPR012604; IPR012677; IPR003954;	RNA recognition motif domain; RBM1CTR; Nucleotide-binding alpha-beta plait domain; RNA recognition motif domain, eukaryote;	CDC5L complex; C complex spliceosome;	R	KOG0118	FOG: RRM domain
Q96CV9	525	T	Optineurin	OPTN	0.538	0.00375	Down	Q2	0.921253	5.45e-56	226.7	T(0.921)S(0.079)DSDQQAYLVQR	2	0.51304	cytoplasm	single organism signaling; defense response to other organism; establishment of protein localization to plasma membrane; regulation of defense response; autophagy; cellular metabolic process; regulation of mitochondrion organization; protein transport; response to biotic stimulus; response to external stimulus; metabolic process; regulation of I-kappaB kinase/NF-kappaB signaling; cell cycle phase…	membrane; organelle membrane; cytoplasmic vesicle; cytoplasm; vesicle; cytoplasmic vesicle part; recycling endosome membrane; intracellular part; cell; organelle part; autophagosome; recycling endosome; membrane-enclosed lumen; nucleoplasm; intracellular organelle lumen; intracellular; cell part; whole membrane; Golgi subcompartment; Golgi apparatus part; perinuclear region of cytoplasm; endosome…	small GTPase binding; polyubiquitin binding; protein binding, bridging; ion binding; protein binding; ubiquitin-like protein binding; Rab GTPase binding; identical protein binding; Ras GTPase binding; binding; K63-linked polyubiquitin binding; metal ion binding; cation binding; ubiquitin binding; protein C-terminus binding; binding, bridging; GTPase binding; enzyme binding;	K19946			IPR021063; IPR032419;	NF-kappa-B essential modulator NEMO, N-terminal; NF-kappa-B essential modulator NEMO, CC2-LZ domain;	HD-RAB8A-OPTN complex;
P15924	173	T	Desmoplakin	DSP	0.539	0.0195	Down	Q2	0.804111	6.01e-10	80.554	RAS(0.215)S(0.615)KGGGGY(0.005)T(0.804)CQS(0.359)GS(0.002)GWDEFTK	4	1.0232	nucleus	single organism signaling; regulation of biological quality; leukocyte activation; protein localization to adherens junction; keratinization; muscle tissue morphogenesis; cellular metabolic process; biological adhesion; bundle of His cell-Purkinje myocyte adhesion involved in cell communication; cardiac conduction; epidermal cell differentiation; metabolic process; regulation of action potential;…	basolateral plasma membrane; membrane; extracellular region part; organelle membrane; cytoplasmic vesicle; cell-cell contact zone; cell junction; cell periphery; vesicle; cytoplasm; cytoplasmic vesicle part; supramolecular fiber; intracellular part; cell-cell adherens junction; supramolecular complex; cell-cell junction; cell; organelle part; intercalated disc; non-membrane-bounded organelle; cyt…	RNA binding; protein binding, bridging; protein kinase binding; scaffold protein binding; cell adhesive protein binding involved in bundle of His cell-Purkinje myocyte communication; protein binding; kinase binding; protein binding involved in cell-cell adhesion; protein binding involved in heterotypic cell-cell adhesion; heterocyclic compound binding; organic cyclic compound binding; cell adhesi…	K10381	DSP; desmoplakin	hsa05412 Arrhythmogenic right ventricular cardiomyopathy (ARVC) - Homo sapiens (human);				Z	KOG0516	Dystonin, GAS (Growth-arrest-specific protein), and related proteins
Q8WXI9	135	S	Transcriptional repressor p66-beta	GATAD2B	0.539	0.00538	Down	Q2	0.887472	6.38e-10	111.24	LTPSPDIIVLSDNEAS(0.112)S(0.887)PR	3	-0.59239	cytoplasm	regulation of cellular process; cellular component organization; chromatin remodeling; cellular aromatic compound metabolic process; nucleic acid-templated transcription; regulation of macromolecule metabolic process; regulation of nucleobase-containing compound metabolic process; biosynthetic process; cellular metabolic process; organic substance metabolic process; regulation of RNA biosynthetic…	intracellular organelle; intracellular non-membrane-bounded organelle; intracellular organelle part; macromolecular complex; nuclear lumen; intracellular part; nuclear body; cell; organelle part; chromosomal part; non-membrane-bounded organelle; organelle; intracellular membrane-bounded organelle; membrane-enclosed lumen; nucleoplasm; nucleus; intracellular organelle lumen; chromatin; nuclear chr…	organic cyclic compound binding; heterocyclic compound binding; DNA binding; transition metal ion binding; binding; nucleic acid binding transcription factor activity; nucleic acid binding; ion binding; cation binding; metal ion binding; protein binding; zinc ion binding; sequence-specific DNA binding; transcription factor activity, sequence-specific DNA binding;				IPR013088; IPR032346; IPR000679;	Zinc finger, NHR/GATA-type; Transcriptional repressor p66, coiled-coil MBD2-interaction domain; Zinc finger, GATA-type;	HDAC2-asscociated core complex; MeCP1 complex; LARC complex (LCR-associated remodeling complex); HDAC1-associated core complex cII;	S	KOG3740	Uncharacterized conserved protein
Q9UHQ9	150	S	NADH-cytochrome b5 reductase 1	CYB5R1	0.539	0.00129	Down	Q2	0.999985	8.87e-06	128.76	GPS(1)GLLTYTGK	2	1.0306	extracellular	positive regulation of protein targeting to mitochondrion; regulation of protein targeting; single-organism process; biosynthetic process; regulation of mitochondrion organization; positive regulation of establishment of protein localization to mitochondrion; lipid biosynthetic process; establishment of localization; positive regulation of cellular component organization; metabolic process; regul…	membrane; endoplasmic reticulum; nuclear outer membrane-endoplasmic reticulum membrane network; extracellular region part; organelle membrane; cytoplasmic vesicle; cell periphery; vesicle; cytoplasm; cytoplasmic vesicle part; intrinsic component of membrane; intracellular part; cell; organelle part; extracellular exosome; membrane part; intracellular; cell part; whole membrane; secretory vesicle;…	oxidoreductase activity, acting on NAD(P)H; oxidoreductase activity, acting on NAD(P)H, heme protein as acceptor; catalytic activity; binding; cytochrome-b5 reductase activity, acting on NAD(P)H; protein binding; oxidoreductase activity;	K00326	E1.6.2.2; cytochrome-b5 reductase [EC:1.6.2.2]	hsa00520 Amino sugar and nucleotide sugar metabolism - Homo sapiens (human);	IPR017927; IPR001433; IPR008333; IPR017938; IPR001709;	Ferredoxin reductase-type FAD-binding domain; Oxidoreductase FAD/NAD(P)-binding; Oxidoreductase, FAD-binding domain; Riboflavin synthase-like beta-barrel; Flavoprotein pyridine nucleotide cytochrome reductase;		HC	KOG0534	NADH-cytochrome b-5 reductase
Q9UDY2	1159	S	Tight junction protein ZO-2	TJP2	0.54	0.0431	Down	Q2	0.999924	4.09e-52	200.98	GSYGS(1)DAEEEEYR	2	0.14571	nucleus	single organism signaling; GDP metabolic process; negative regulation of developmental process; regulation of biological quality; nucleoside metabolic process; purine nucleoside metabolic process; digestion; purine ribonucleoside monophosphate metabolic process; cell surface receptor signaling pathway; negative regulation of myeloid leukocyte differentiation; intestinal absorption; cellular devel…	intracellular organelle; membrane; cell periphery; cell junction; intracellular organelle part; cytoplasm; anchoring junction; nuclear lumen; intracellular part; cell-cell junction; cytosol; cell; bicellular tight junction; organelle part; apical junction complex; plasma membrane; membrane-enclosed lumen; organelle; intracellular membrane-bounded organelle; nucleoplasm; nucleus; occluding junctio…	protein binding, bridging; nucleobase-containing compound kinase activity; protein binding; phosphotransferase activity, phosphate group as acceptor; nucleotide kinase activity; cell adhesion molecule binding; kinase activity; catalytic activity; binding; guanylate kinase activity; cadherin binding; protein domain specific binding; binding, bridging; protein C-terminus binding; transferase activi…	K06098	TJP2; tight junction protein 2	hsa05110 Vibrio cholerae infection - Homo sapiens (human); hsa04530 Tight junction - Homo sapiens (human);	IPR011511; IPR001452; IPR008144; IPR008145; IPR027417; IPR001478;	Variant SH3 domain; SH3 domain; Guanylate kinase-like domain; Guanylate kinase/L-type calcium channel beta subunit; P-loop containing nucleoside triphosphate hydrolase; PDZ domain;		T	KOG3580	Tight junction proteins
P06733	79	S	Alpha-enolase	ENO1	0.542	0.000223	Down	Q2	0.999936	0.000894	86.772	TIAPALVS(1)K	3	-0.46379	cytoplasm	nucleoside metabolic process; nucleoside diphosphate phosphorylation; pyridine nucleotide metabolic process; glycolytic process; nucleic acid-templated transcription; ribonucleoside diphosphate metabolic process; cellular metabolic process; response to biotic stimulus; regulation of cell growth; glucose metabolic process; response to external stimulus; metabolic process; gluconeogenesis; generati…	membrane; extracellular space; extracellular region part; cell periphery; myofibril; vesicle; cytoplasm; macromolecular complex; supramolecular fiber; intracellular part; supramolecular complex; cell; organelle part; non-membrane-bounded organelle; extracellular exosome; catalytic complex; intracellular; cell part; contractile fiber; extracellular vesicle; cytosolic part; M band; membrane-bounded…	magnesium ion binding; DNA binding; RNA binding; phosphopyruvate hydratase activity; ion binding; lyase activity; protein binding; hydro-lyase activity; carbon-oxygen lyase activity; heterocyclic compound binding; organic cyclic compound binding; cell adhesion molecule binding; catalytic activity; binding; cadherin binding; nucleic acid binding; cation binding; metal ion binding; GTPase binding; …	K01689	ENO; enolase [EC:4.2.1.11]	hsa03018 RNA degradation - Homo sapiens (human); hsa04066 HIF-1 signaling pathway - Homo sapiens (human); hsa01100 Metabolic pathways - Homo sapiens (human); hsa00010 Glycolysis / Gluconeogenesis - Homo sapiens (human); hsa01230 Biosynthesis of amino acids - Homo sapiens (human); hsa01200 Carbon metabolism - Homo sapiens (human);	IPR029065; IPR029017; IPR020810; IPR020811;	Enolase C-terminal domain-like; Enolase N-terminal domain-like; Enolase, C-terminal TIM barrel domain; Enolase, N-terminal;		G	KOG2670	Enolase
Q53SF7	242	S	Cordon-bleu protein-like 1	COBLL1	0.544	0.0241	Down	Q2	1	0.000937	101.57	S(1)LNDLGLR	2	-1.1884	nucleus	cellular component biogenesis; cellular macromolecular complex assembly; cellular component organization; protein complex subunit organization; single-organism cellular process; actin polymerization or depolymerization; single-organism process; actin filament organization; actin filament polymerization; macromolecular complex subunit organization; single-organism organelle organization; actin fil…	extracellular exosome; organelle; extracellular region part; vesicle; extracellular vesicle; membrane-bounded organelle; extracellular region; extracellular organelle;	actin binding; cell adhesion molecule binding; protein binding; cytoskeletal protein binding; actin monomer binding; binding; cadherin binding;				IPR019025; IPR003124;	Cordon-bleu, ubiquitin-like domain; WH2 domain;	CEN complex;
P05783	34	S	Keratin, type I cytoskeletal 18	KRT18	0.545	0.00385	Down	Q2	0.999782	1.66e-21	152.13	PVSSAAS(1)VYAGAGGSGSR	2	0.045108	mitochondria	single organism signaling; regulation of cell death; endomembrane system organization; keratinization; cell surface receptor signaling pathway; cellular developmental process; establishment of protein localization to plasma membrane; single-organism process; multi-organism cellular process; cellular response to cytokine stimulus; protein transport; establishment of localization; biological adhesi…	extracellular region part; microtubule organizing center part; cell junction; cell periphery; vesicle; cytoplasm; supramolecular fiber; intracellular part; cell-cell adherens junction; supramolecular complex; cell-cell junction; cell; organelle part; non-membrane-bounded organelle; extracellular exosome; membrane-enclosed lumen; cytoskeleton; microtubule organizing center; intracellular organelle…	organic cyclic compound binding; heterocyclic compound binding; cadherin binding involved in cell-cell adhesion; cell adhesion molecule binding; RNA binding; protein binding involved in cell adhesion; binding; cadherin binding; nucleic acid binding; scaffold protein binding; protein binding; protein binding involved in cell-cell adhesion; structural molecule activity;	K07604	KRT1; type I keratin, acidic	hsa05150 Staphylococcus aureus infection - Homo sapiens (human); hsa05130 Pathogenic Escherichia coli infection - Homo sapiens (human);				R	KOG0508	Ankyrin repeat protein
Q01814	1160	S	Plasma membrane calcium-transporting ATPase 2	ATP2B2	0.545	0.0101	Down	Q2	0.999995	0.00116	58.98	SSLYEGLEKPES(1)R	3	1.9195	plasma membrane	regulation of biological quality; gland development; brain development; cellular component morphogenesis; cellular metabolic process; neurological system process; behavior; hair cell differentiation; response to external stimulus; epidermal cell differentiation; metabolic process; embryonic organ morphogenesis; regulation of localization; detection of stimulus; regulation of cellular component si…	membrane; extracellular region part; endoplasmic reticulum; apical plasma membrane; cell junction; cell periphery; vesicle; cytoplasm; neuronal cell body; intrinsic component of membrane; intracellular part; integral component of plasma membrane; cell; extracellular exosome; plasma membrane region; membrane part; intracellular; cell part; extracellular vesicle; membrane-bounded organelle; neuron …	ATPase coupled ion transmembrane transporter activity; nucleoside phosphate binding; primary active transmembrane transporter activity; substrate-specific transporter activity; hydrolase activity, acting on acid anhydrides; hydrolase activity; protein binding; substrate-specific transmembrane transporter activity; ATPase activity; heterocyclic compound binding; organic cyclic compound binding; me…	K05850	ATP2B; Ca2+ transporting ATPase, plasma membrane [EC:3.6.3.8]	hsa04024 cAMP signaling pathway - Homo sapiens (human); hsa04978 Mineral absorption - Homo sapiens (human); hsa04261 Adrenergic signaling in cardiomyocytes - Homo sapiens (human); hsa04972 Pancreatic secretion - Homo sapiens (human); hsa04970 Salivary secretion - Homo sapiens (human); hsa04961 Endocrine and other factor-regulated calcium reabsorption - Homo sapiens (human); hsa04022 cGMP-PKG sign…	IPR023298; IPR004014; IPR022141; IPR008250; IPR023299; IPR023214; IPR006068;	P-type ATPase, transmembrane domain; Cation-transporting P-type ATPase, N-terminal; Plasma membrane calcium transporting P-type ATPase, C-terminal; P-type ATPase, A domain; P-type ATPase, cytoplasmic domain N; HAD-like domain; Cation-transporting P-type ATPase, C-terminal;		P	KOG0204	Calcium transporting ATPase
Q6P4E1	366	S	Protein CASC4	CASC4	0.545	0.0457	Down	Q2	1	5.44e-17	151.96	FFDENES(1)PVDPQHGSK	3	-0.33803	extracellular		intracellular organelle; membrane; cytoplasm; intrinsic component of membrane; endomembrane system; intracellular part; cell; integral component of membrane; intracellular membrane-bounded organelle; organelle; intracellular; cell part; membrane part; Golgi apparatus; membrane-bounded organelle; cytoplasmic part;
P08670	73	S	Vimentin	VIM	0.546	0.00669	Down	Q2	1	2.44e-05	134.2	LRS(1)S(1)VPGVR	3	0.22789	nucleus	single organism signaling; actin filament-based movement; negative regulation of developmental process; actin-mediated cell contraction; muscle system process; intermediate filament organization; cell surface receptor signaling pathway; negative regulation of cellular component organization; cellular developmental process; lens fiber cell differentiation; negative regulation of multicellular orga…	membrane; extracellular region part; cell periphery; cell junction; vesicle; cytoplasm; supramolecular fiber; intracellular part; supramolecular complex; cell; organelle part; non-membrane-bounded organelle; extracellular exosome; cytoskeleton; focal adhesion; intracellular; cell part; microbody; adherens junction; extracellular vesicle; neuron projection; cell-substrate junction; membrane-bounde…	structural constituent of eye lens; RNA binding; double-stranded RNA binding; macromolecular complex binding; scaffold protein binding; protein binding; heterocyclic compound binding; organic cyclic compound binding; carbohydrate derivative binding; identical protein binding; structural constituent of cytoskeleton; intermediate filament binding; binding; nucleic acid binding; protein C-terminus b…	K07606	VIM; vimentin	hsa05206 MicroRNAs in cancer - Homo sapiens (human); hsa05169 Epstein-Barr virus infection - Homo sapiens (human);	IPR006821;	Intermediate filament head, DNA-binding domain;		DY	KOG0977	Nuclear envelope protein lamin, intermediate filament superfamily
Q14103	190	S	Heterogeneous nuclear ribonucleoprotein D0	HNRNPD	0.546	0.00357	Down	Q2	0.997401	7.16e-10	123.29	IFVGGLS(0.997)PDT(0.003)PEEK	3	0.32542	nucleus	regulation of biological quality; gland development; positive regulation of cellular protein metabolic process; positive regulation of telomerase activity; RNA stabilization; nucleic acid-templated transcription; posttranscriptional regulation of gene expression; brain development; positive regulation of biosynthetic process; regulation of telomere maintenance; cellular metabolic process; metabol…	intracellular organelle; extracellular region part; intracellular organelle part; vesicle; cytoplasm; macromolecular complex; nuclear lumen; intracellular part; cytosol; cell; extracellular region; organelle part; membrane-enclosed lumen; intracellular membrane-bounded organelle; organelle; extracellular exosome; nucleus; nucleoplasm; intracellular organelle lumen; intracellular; cell part; extra…	RNA binding; DNA binding; AU-rich element binding; nucleoside phosphate binding; double-stranded DNA binding; mRNA 3'-UTR binding; sequence-specific double-stranded DNA binding; telomeric DNA binding; protein binding; nucleotide binding; chromatin binding; mRNA 3'-UTR AU-rich region binding; sequence-specific DNA binding; heterocyclic compound binding; organic cyclic compound binding; mRNA bindin…	K13044			IPR000504; IPR012677; IPR012956;	RNA recognition motif domain; Nucleotide-binding alpha-beta plait domain; CARG-binding factor, N-terminal;	PIN1-AUF1 complex; PABPC1-HSPA8-HNRPD-EIF4G1 complex; Multiprotein complex (mRNA turnover);	R	KOG0118	FOG: RRM domain
Q6DN90	262	S	IQ motif and SEC7 domain-containing protein 1	IQSEC1	0.546	0.0384	Down	Q2	0.975522	2.33e-24	176.42	S(0.976)LHT(0.024)EEAPALDAAR	2	-0.25753	cytoplasm	regulation of cellular process; cellular component organization; regulation of intracellular signal transduction; positive regulation of GTPase activity; regulation of signaling; single-organism cellular process; single-organism process; regulation of Ras protein signal transduction; positive regulation of catalytic activity; single-organism organelle organization; actin cytoskeleton organization…	membrane; intracellular organelle; intracellular non-membrane-bounded organelle; intracellular organelle part; cytoplasm; nuclear lumen; intracellular part; nucleolus; cell; organelle part; non-membrane-bounded organelle; organelle; intracellular membrane-bounded organelle; membrane-enclosed lumen; nucleus; intracellular organelle lumen; intracellular; cell part; membrane-bounded organelle; organ…	lipid binding; protein binding; molecular function regulator; ARF guanyl-nucleotide exchange factor activity; guanyl-nucleotide exchange factor activity; binding;	K12495	IQSEC; IQ motif and SEC7 domain-containing protein	hsa04144 Endocytosis - Homo sapiens (human);	IPR023394; IPR033742; IPR011993; IPR000904; IPR001849;	Sec7 domain, alpha orthogonal bundle; IQ motif and SEC7 domain-containing protein, PH domain; PH domain-like; Sec7 domain; Pleckstrin homology domain;		U	KOG0931	Predicted guanine nucleotide exchange factor, contains Sec7 domain
Q9Y6N7	1240	T	Roundabout homolog 1	ROBO1	0.546	0.0133	Down	Q2	1	2.94e-20	130.15	MYLQQDELEEEEDERGPT(1)PPVR	4	-0.14873	extracellular	single organism signaling; regulation of cell death; tissue migration; positive regulation of cellular protein metabolic process; cell surface receptor signaling pathway; brain development; olfactory bulb development; cellular component morphogenesis; cerebral cortex tangential migration using cell-cell interactions; cerebral cortex development; negative regulation of cell proliferation; telencep…	membrane; intrinsic component of plasma membrane; cell projection; cell periphery; cytoplasm; intrinsic component of membrane; intracellular part; integral component of plasma membrane; cell; integral component of membrane; plasma membrane; axon; plasma membrane part; cell part; intracellular; membrane part; neuron projection; cell surface; neuron part;	signaling receptor activity; molecular transducer activity; receptor activity; identical protein binding; LRR domain binding; axon guidance receptor activity; binding; protein binding; protein domain specific binding; transmembrane signaling receptor activity; signal transducer activity; transmembrane receptor activity;	K06753	ROBO1; roundabout, axon guidance receptor 1	hsa04360 Axon guidance - Homo sapiens (human);	IPR003598; IPR007110; IPR013783; IPR003599; IPR013106; IPR003961; IPR013098;	Immunoglobulin subtype 2; Immunoglobulin-like domain; Immunoglobulin-like fold; Immunoglobulin subtype; Immunoglobulin V-set domain; Fibronectin type III; Immunoglobulin I-set;		T	KOG4222	Axon guidance receptor Dscam
O95255	492	S	Multidrug resistance-associated protein 6	ABCC6	0.547	0.0178	Down	Q2	0.878082	0.00147	88.921	LT(0.061)S(0.878)S(0.061)ILR	2	0.085637	plasma membrane	inorganic anion transmembrane transport; sensory perception; ion transmembrane transport; system process; inorganic ion transmembrane transport; visual perception; ATP hydrolysis coupled transmembrane transport; sensory perception of light stimulus; response to stimulus; multicellular organismal process; anion transmembrane transport; neurological system process; establishment of localization; an…	intracellular organelle; basolateral plasma membrane; membrane; nuclear outer membrane-endoplasmic reticulum membrane network; endoplasmic reticulum; apical plasma membrane; cell periphery; intracellular organelle part; cytoplasm; intrinsic component of membrane; endomembrane system; intracellular part; cell; integral component of membrane; organelle part; lateral plasma membrane; plasma membrane…	ATPase coupled ion transmembrane transporter activity; nucleoside phosphate binding; primary active transmembrane transporter activity; substrate-specific transporter activity; hydrolase activity, acting on acid anhydrides; hydrolase activity; substrate-specific transmembrane transporter activity; ATPase activity; organic cyclic compound binding; heterocyclic compound binding; pyrophosphatase act…	K05669	ABCC6; ATP-binding cassette, subfamily C (CFTR/MRP), member 6	hsa02010 ABC transporters - Homo sapiens (human);	IPR003593; IPR003439; IPR011527; IPR027417;	AAA+ ATPase domain; ABC transporter-like; ABC transporter type 1, transmembrane domain; P-loop containing nucleoside triphosphate hydrolase;		Q	KOG0054	Multidrug resistance-associated protein/mitoxantrone resistance protein, ABC superfamily
Q9HCD5	151	S	Nuclear receptor coactivator 5	NCOA5	0.547	0.00436	Down	Q2	0.999999	0.000363	97.734	YRDS(1)FDGR	3	-0.44229	nucleus	regulation of biological quality; negative regulation of signal transduction; nucleic acid-templated transcription; regulation of signaling; glucose homeostasis; biosynthetic process; cellular metabolic process; regulation of RNA biosynthetic process; metabolic process; regulation of cell communication; macromolecule metabolic process; regulation of gene expression; heterocycle biosynthetic proce…	intracellular organelle; extracellular space; extracellular region part; intracellular non-membrane-bounded organelle; intracellular part; cell; actin cytoskeleton; extracellular region; non-membrane-bounded organelle; intracellular membrane-bounded organelle; organelle; cytoskeleton; nucleus; intracellular; cell part; membrane-bounded organelle;	organic cyclic compound binding; heterocyclic compound binding; RNA binding; protein binding; chromatin binding; binding; nucleic acid binding;				IPR004154;	Anticodon-binding;		YU	KOG0845	Nuclear pore complex, Nup98 component (sc Nup145/Nup100/Nup116)
Q9UBW5	410	T	Bridging integrator 2	BIN2	0.547	0.00206	Down	Q2	0.906277	1.3e-06	117.2	T(0.906)S(0.094)APPSRPPPPR	3	0.54992	nucleus	cellular component biogenesis; endomembrane system organization; leukocyte activation; localization of cell; single-organism process; establishment of localization; phagocytosis; response to external stimulus; cellular component assembly; macromolecular complex assembly; cellular response to chemical stimulus; myeloid leukocyte activation; secretion; single-organism transport; phagocytosis, engul…	membrane; secretory granule lumen; cell cortex; cytoplasmic vesicle; cell junction; cell periphery; cytoplasmic region; vesicle; cytoplasm; cytoplasmic vesicle part; macromolecular complex; intracellular part; cell; ficolin-1-rich granule lumen; organelle part; non-membrane-bounded organelle; ficolin-1-rich granule; cytoskeleton; membrane-enclosed lumen; vesicle lumen; intracellular organelle lum…	lipid binding; anion binding; protein binding; binding; phospholipid binding; ion binding;	K20119			IPR027267; IPR004148;	Arfaptin homology (AH) domain/BAR domain; BAR domain;		U	KOG3771	Amphiphysin
O00763	91	S	Acetyl-CoA carboxylase 2	ACACB	0.549	0.000726	Down	Q2	1	1.5e-09	137.91	RNS(1)LPPSHQKPPR	4	-0.13901	plasma membrane	cellular component biogenesis; regulation of biological quality; cellular lipid metabolic process; regulation of lipid metabolic process; cellular metabolic process; sulfur compound biosynthetic process; positive regulation of growth; lipid biosynthetic process; response to external stimulus; metabolic process; monocarboxylic acid transport; positive regulation of multicellular organismal process…	intracellular organelle; membrane; outer membrane; mitochondrial part; bounding membrane of organelle; organelle membrane; mitochondrial outer membrane; cytoplasm; intracellular organelle part; organelle envelope; endomembrane system; intracellular part; cytosol; cell; organelle part; mitochondrion; organelle; intracellular membrane-bounded organelle; mitochondrial envelope; nucleus; intracellula…	nucleoside phosphate binding; ligase activity, forming carbon-carbon bonds; ligase activity; protein binding; acetyl-CoA carboxylase activity; organic cyclic compound binding; heterocyclic compound binding; carboxylic acid binding; ribonucleotide binding; catalytic activity; binding; purine ribonucleoside binding; cation binding; anion binding; adenyl ribonucleotide binding; adenyl nucleotide bin…	K01946	ACACB; acetyl-CoA carboxylase / biotin carboxylase 2 [EC:6.4.1.2 6.3.4.14]	hsa00061 Fatty acid biosynthesis - Homo sapiens (human); hsa04920 Adipocytokine signaling pathway - Homo sapiens (human); hsa00640 Propanoate metabolism - Homo sapiens (human); hsa00620 Pyruvate metabolism - Homo sapiens (human); hsa01100 Metabolic pathways - Homo sapiens (human); hsa04922 Glucagon signaling pathway - Homo sapiens (human); hsa04910 Insulin signaling pathway - Homo sapiens (human)…	IPR011762; IPR000022; IPR029045; IPR005481; IPR000089; IPR016185; IPR011761; IPR005482; IPR011053; IPR005479; IPR013815; IPR013537; IPR011764; IPR013816; IPR011763; IPR011054;	Acetyl-coenzyme A carboxyltransferase, N-terminal; Carboxyl transferase; ClpP/crotonase-like domain; Biotin carboxylase-like, N-terminal domain; Biotin/lipoyl attachment; Pre-ATP-grasp domain; ATP-grasp fold; Biotin carboxylase, C-terminal; Single hybrid motif; Carbamoyl-phosphate synthetase large subunit-like, ATP-binding domain; ATP-grasp fold, subdomain 1; Acetyl-CoA carboxylase, central domai…		I	KOG0368	Acetyl-CoA carboxylase
Q8WWI1	926	S	LIM domain only protein 7	LMO7	0.549	0.0465	Down	Q2	0.957892	0.000952	93.166	GIS(0.042)S(0.958)LPR	2	0.6293	nucleus	protein ubiquitination; regulation of signaling; cellular protein metabolic process; protein modification by small protein conjugation or removal; primary metabolic process; cellular metabolic process; regulation of cell adhesion; protein polyubiquitination; organic substance metabolic process; metabolic process; regulation of biological process; protein modification by small protein conjugation;…	intracellular organelle; cell junction; cytoplasm; anchoring junction; macromolecular complex; intracellular part; transferase complex; cytosol; cell; intracellular membrane-bounded organelle; organelle; catalytic complex; nucleus; focal adhesion; intracellular; cell part; adherens junction; cell-substrate junction; ubiquitin ligase complex; membrane-bounded organelle; cytoplasmic part; cell-subs…	transition metal ion binding; ubiquitin-like protein transferase activity; catalytic activity; binding; ion binding; ubiquitin-protein transferase activity; cation binding; metal ion binding; protein binding; zinc ion binding; transferase activity;	K06084	LMO7; F-box protein 20	hsa04520 Adherens junction - Homo sapiens (human);	IPR001781; IPR031865; IPR001715; IPR001478;	Zinc finger, LIM-type; Domain of unknown function DUF4757; Calponin homology domain; PDZ domain;	Emerin regulatory complex; Emerin complex 1;	TZR	KOG1704	FOG: LIM domain
O75369	2531	S	Filamin-B	FLNB	0.55	0.0422	Down	Q2	0.908467	0.000305	124.21	S(0.908)S(0.092)FLVDCSK	2	0.37548	cytoplasm,nucleus	single organism signaling; regulation of biological quality; cellular developmental process; cellular component morphogenesis; single-organism process; epidermal cell differentiation; signal transduction; actin cytoskeleton organization; cell communication; epidermis development; maintenance of location in cell; protein localization; macromolecule localization; skeletal muscle tissue development;…	membrane; extracellular region part; cluster of actin-based cell projections; brush border; cell cortex; cell junction; cell periphery; myofibril; vesicle; cytoplasm; cytoplasmic region; intrinsic component of membrane; supramolecular fiber; intracellular part; Z disc; supramolecular complex; cell; I band; actin filament bundle; organelle part; non-membrane-bounded organelle; extracellular exosom…	organic cyclic compound binding; heterocyclic compound binding; cell adhesion molecule binding; RNA binding; cytoskeletal protein binding; identical protein binding; binding; cadherin binding; nucleic acid binding; actin binding; protein binding;	K04437	FLNA; filamin	hsa05132 Salmonella infection - Homo sapiens (human); hsa05205 Proteoglycans in cancer - Homo sapiens (human); hsa04010 MAPK signaling pathway - Homo sapiens (human); hsa04510 Focal adhesion - Homo sapiens (human);	IPR013783; IPR014756; IPR001715;	Immunoglobulin-like fold; Immunoglobulin E-set; Calponin homology domain;		Z	KOG0518	Actin-binding cytoskeleton protein, filamin
O14639	435	S	Actin-binding LIM protein 1	ABLIM1	0.551	0.000266	Down	Q2	0.998256	2.49e-12	131.25	T(0.013)LS(0.315)PT(0.673)PS(0.998)AEGYQDVR	3	0.95342	nucleus	cellular component biogenesis; single-multicellular organism process; cellular component organization; lamellipodium organization; visual perception; cilium assembly; single-organism process; cilium organization; neurological system process; anatomical structure morphogenesis; organelle assembly; cellular component assembly; multicellular organism development; cytoskeleton organization; cellular …	cell leading edge; intracellular organelle; cell projection; intracellular non-membrane-bounded organelle; cytoskeletal part; intracellular organelle part; cytoplasm; contractile actin filament bundle; intracellular part; cell; actin cytoskeleton; organelle part; actin filament bundle; non-membrane-bounded organelle; organelle; cytoskeleton; intracellular; cell part; lamellipodium; stress fiber; …	cytoskeletal protein binding; transition metal ion binding; binding; ion binding; actin binding; cation binding; metal ion binding; protein binding; zinc ion binding;	K07520	ABLIM; actin-binding LIM protein	hsa04360 Axon guidance - Homo sapiens (human);	IPR001781; IPR003128; IPR032402;	Zinc finger, LIM-type; Villin headpiece; Putative adherens-junction anchoring domain;		TZ	KOG1044	Actin-binding LIM Zn-finger protein Limatin involved in axon guidance
P00747	45	S	Plasminogen	PLG	0.551	0.00629	Down	Q2	1	3.03e-12	127.97	KQLGAGS(1)IEECAAK	3	0.41487	extracellular	blood coagulation; regulation of biological quality; negative regulation of multicellular organismal process; single-organism process; cellular metabolic process; negative regulation of cell proliferation; establishment of localization; fibrinolysis; response to wounding; metabolic process; positive regulation of multicellular organismal process; negative regulation of response to external stimul…	secretory granule lumen; membrane; extracellular space; extracellular region part; external side of plasma membrane; cytoplasmic vesicle; extrinsic component of membrane; cell periphery; cytoplasm; vesicle; cytoplasmic vesicle part; intracellular part; cell; organelle part; membrane-enclosed lumen; extracellular exosome; vesicle lumen; intracellular organelle lumen; intracellular; cell part; memb…	serine-type endopeptidase activity; endopeptidase activity; peptidase activity; apolipoprotein binding; serine hydrolase activity; receptor binding; catalytic activity; binding; serine-type peptidase activity; peptidase activity, acting on L-amino acid peptides; protein domain specific binding; hydrolase activity; protein binding;	K01315	PLG; plasminogen [EC:3.4.21.7]	hsa04610 Complement and coagulation cascades - Homo sapiens (human); hsa05150 Staphylococcus aureus infection - Homo sapiens (human); hsa05164 Influenza A - Homo sapiens (human); hsa04080 Neuroactive ligand-receptor interaction - Homo sapiens (human);	IPR009003; IPR003609; IPR000001; IPR001254; IPR013806;	Peptidase S1, PA clan; PAN/Apple domain; Kringle; Serine proteases, trypsin domain; Kringle-like fold;		T	KOG1217	Fibrillins and related proteins containing Ca2+-binding EGF-like domains
[truncated: 266 more rows]
